# Supplementary material
Source: PubMed Central journal article supplement (PMC5363285)
Supplement: NIHMS832231-supplement-1.pdf [file NIHMS832231-supplement-1.pdf]

# Supplemental Data

## A

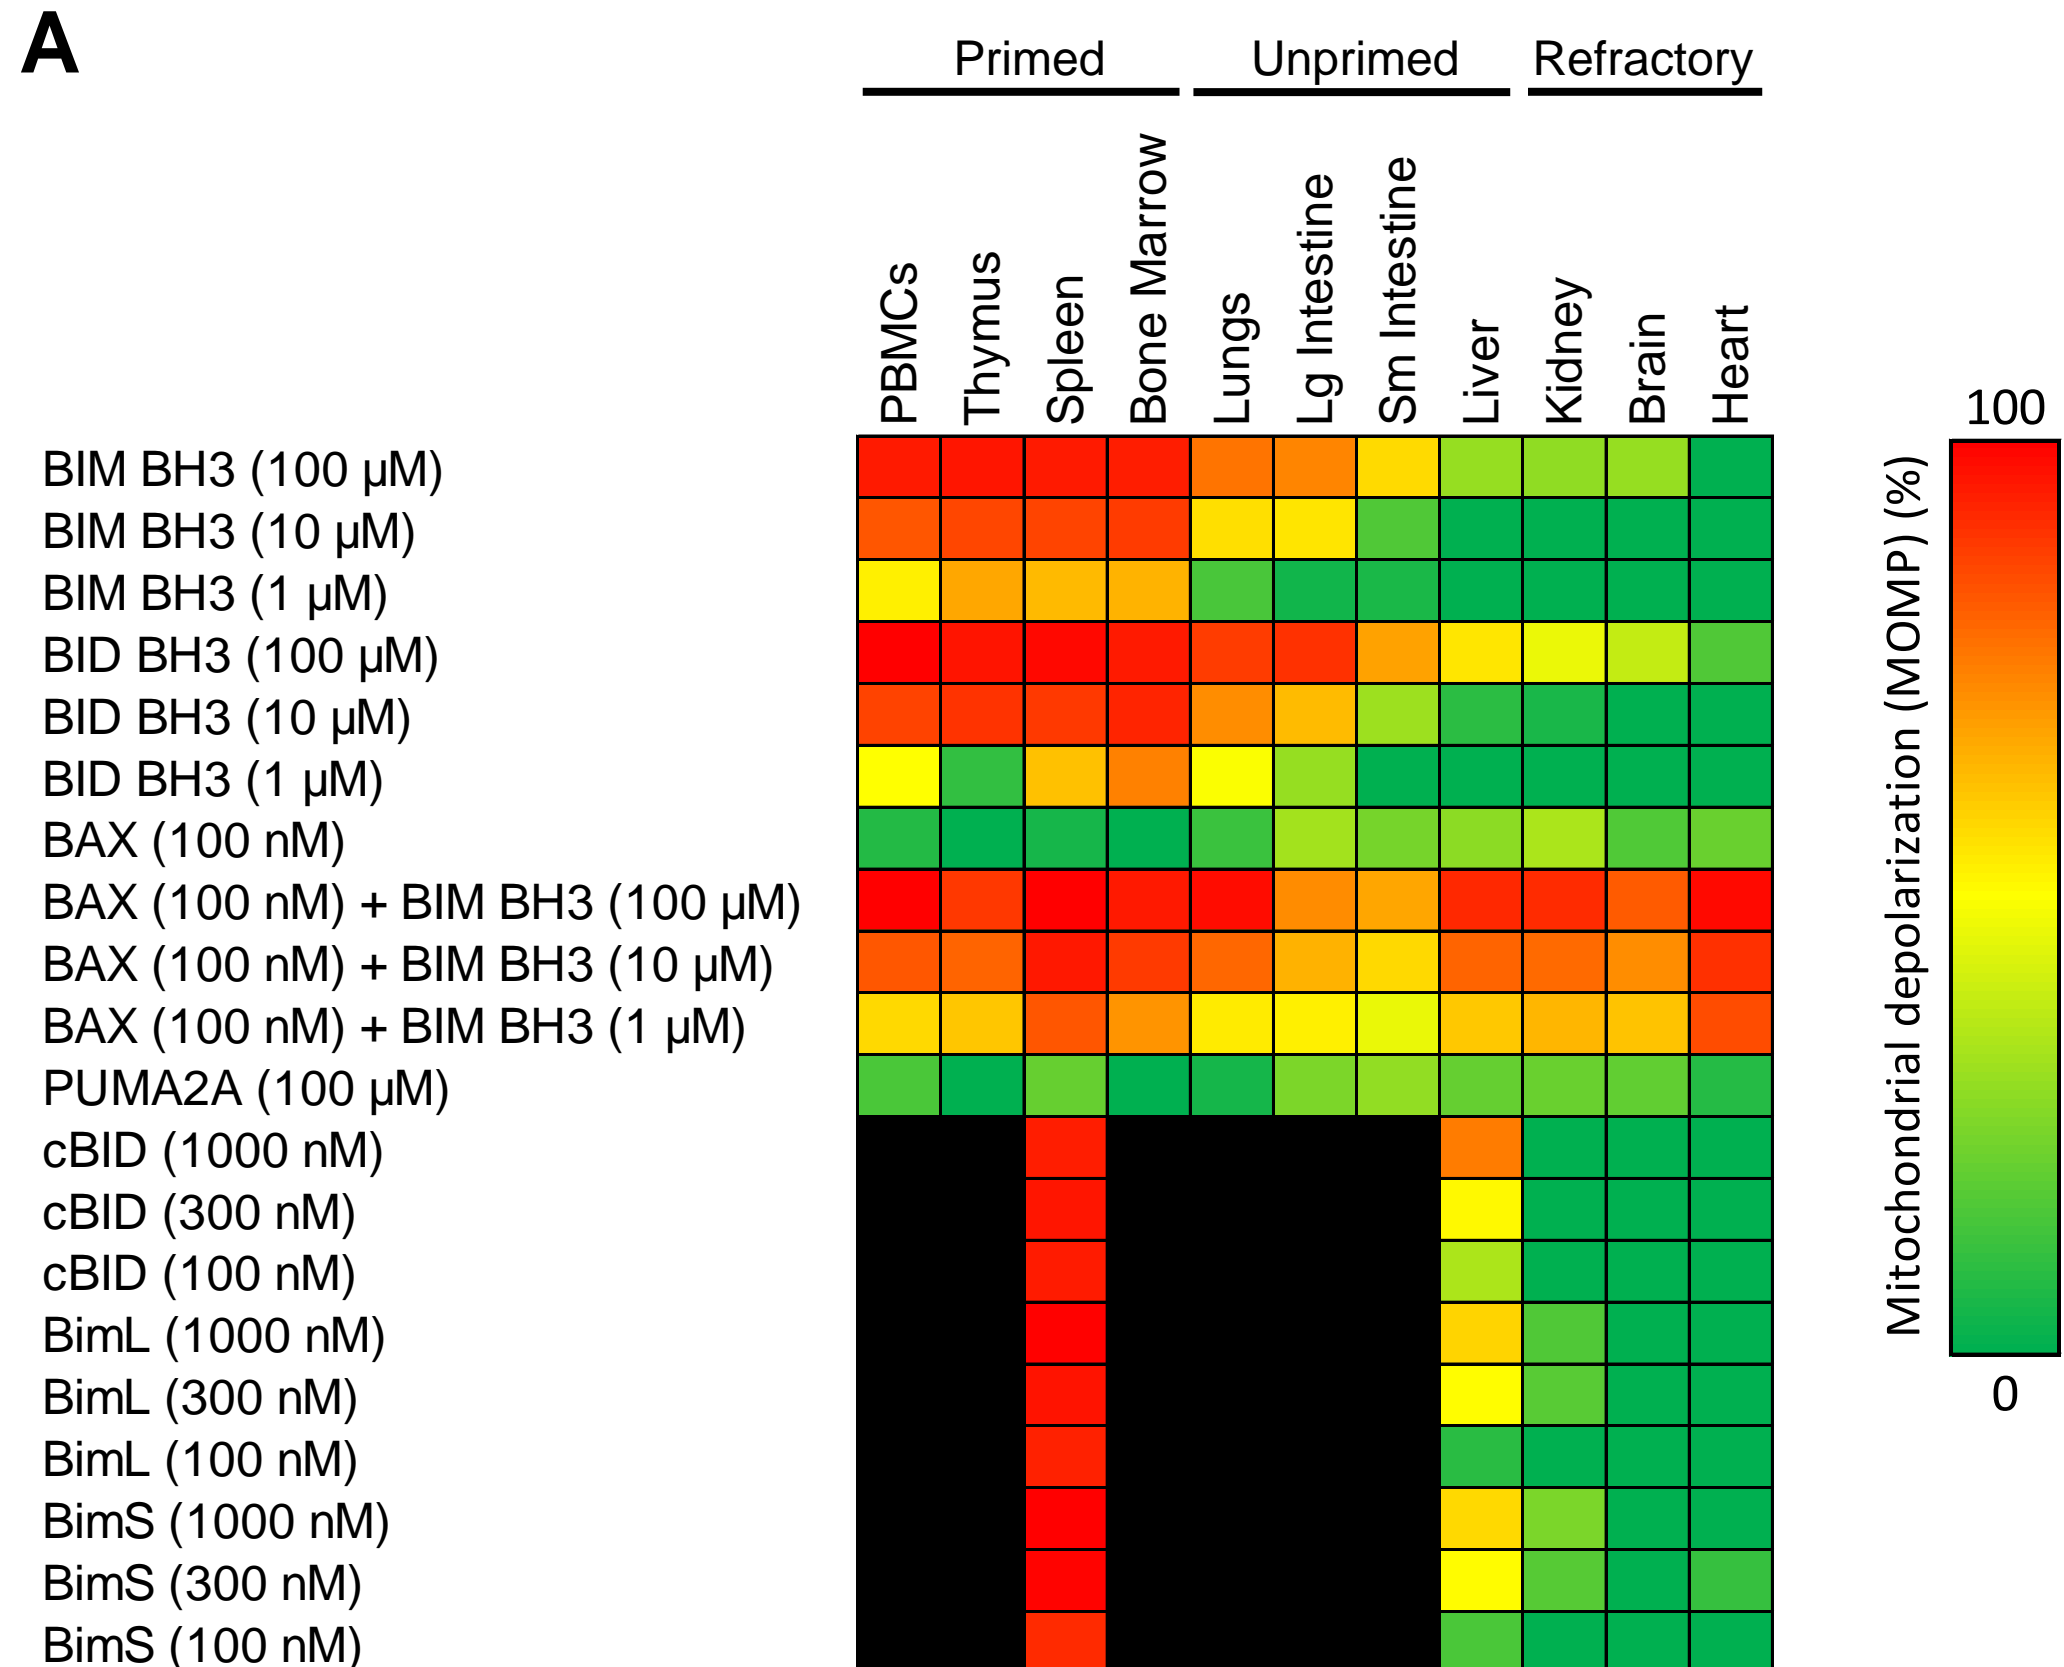

## B

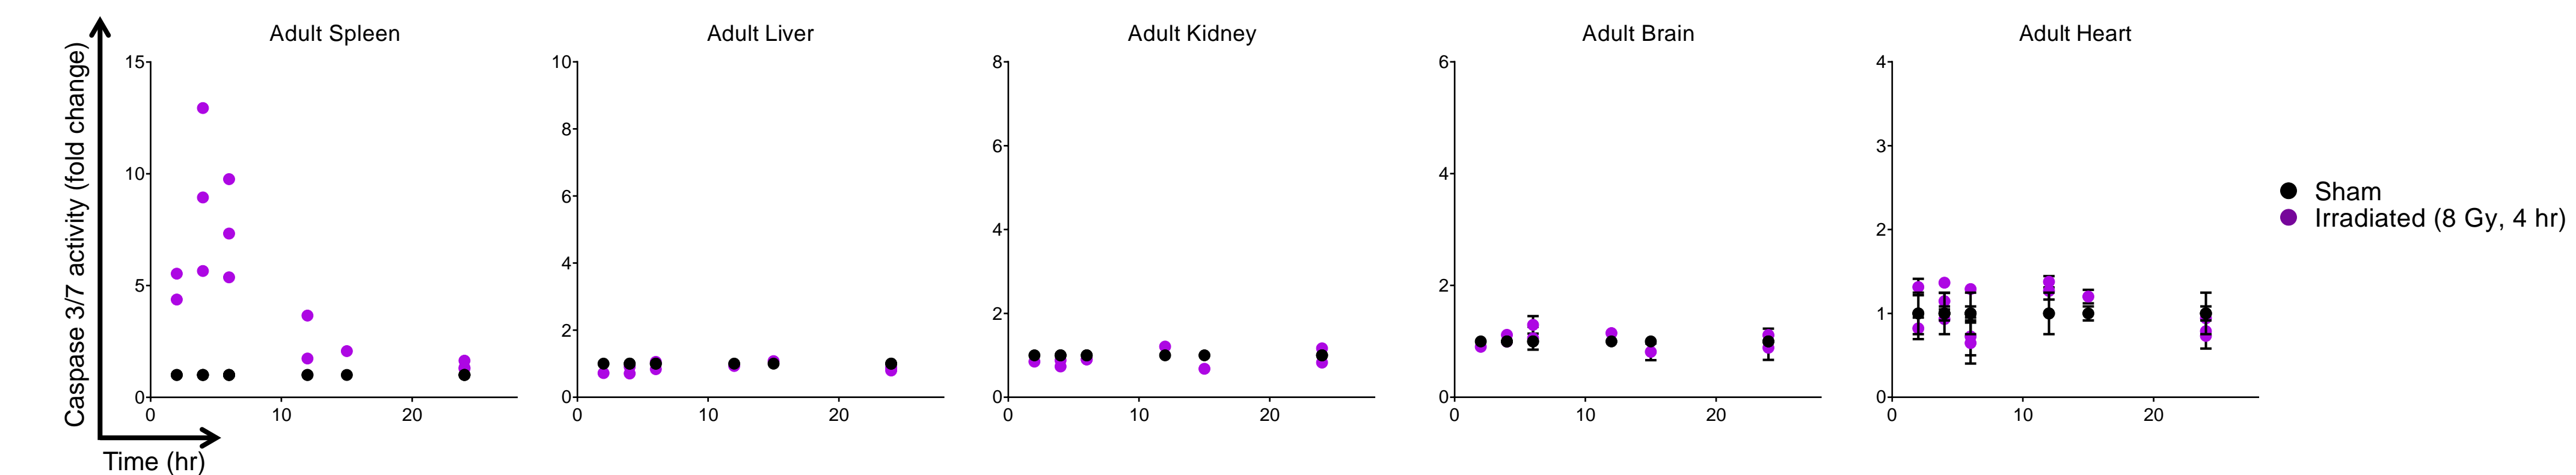

## C

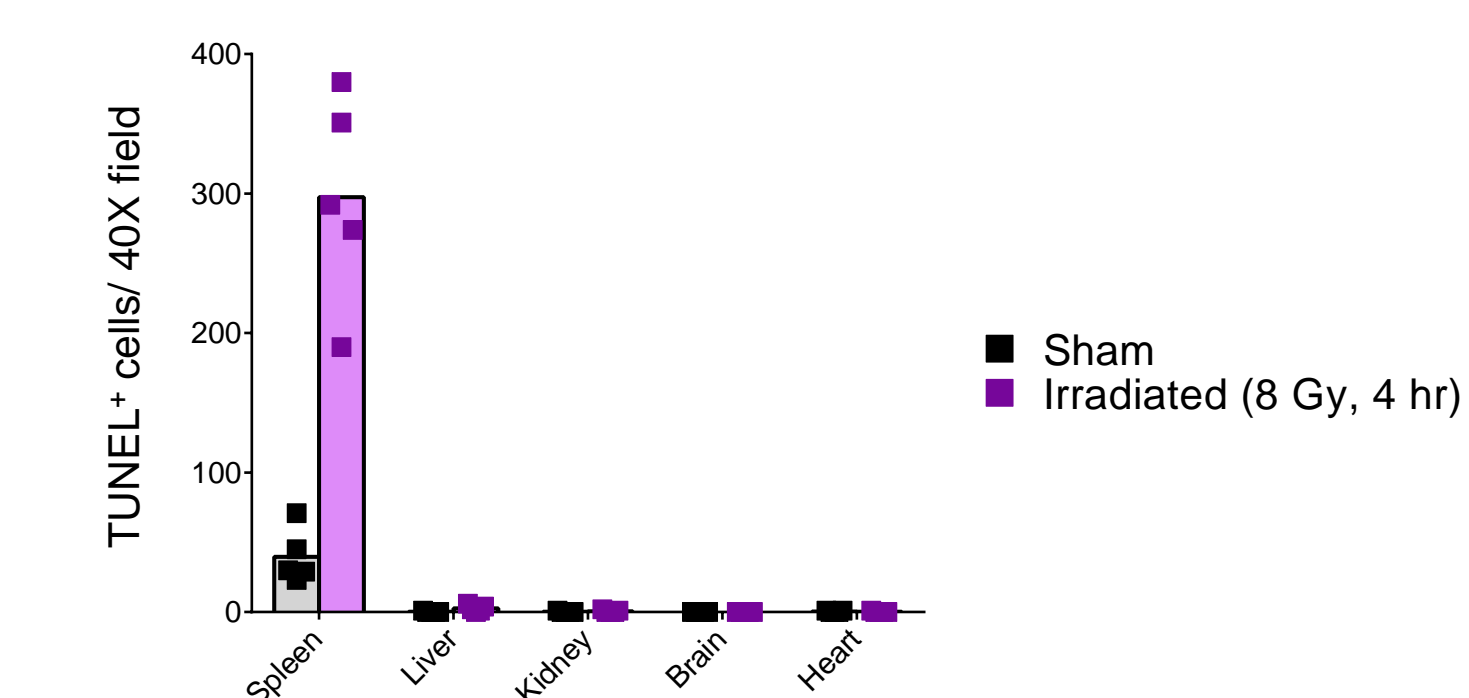

**Figure S1: Measuring apoptotic priming with full-length proteins across adult mouse tissues (Related to Figure 1).** (A) Summary BH3 Profiling data across healthy adult mouse tissues. Data were compiled from three independent experiments. (B) Mice were irradiated and tissues were collected at the indicated time points and caspase 3/7 activity was measured. Data shown are mean  $\pm$  SD, 2 independent experiments (IEs). (C) Mice were irradiated and tissues were collected after four hours and processed for TUNEL staining. Each point represents the total TUNEL<sup>+</sup> cells counted within a 40X field of view (FOV) in each tissue in one experiment. Bars represent means.

**Table S1: Peptide-level mass spectrometry data for human protein expression (Related to Figure 1).**

| Protein                  | Peptide                           | Length           | Protein Accession       | Gene Symbol              | Genespecific | IsoformSpecific | Shared      |
|--------------------------|-----------------------------------|------------------|-------------------------|--------------------------|--------------|-----------------|-------------|
| BAX                      | GGGPTSSEQIMK                      | 12               | gi 242117893 ref        | BAX                      | True         | False           | True        |
|                          | IGDELDNMEQLR                      | 13               | gi 242117893 ref        | BAX                      | True         | False           | True        |
|                          | KLSECLK                           | 7                | gi 242117893 ref        | BAX                      | True         | False           | True        |
|                          | KLSECLKR                          | 8                | gi 242117893 ref        | BAX                      | True         | False           | True        |
|                          | LLKPPHPHHR                        | 10               | gi 4757838 ref          | BAX                      | True         | True            | False       |
|                          | LSECLK                            | 6                | gi 242117893 ref        | BAX                      | True         | False           | True        |
|                          | LSECLKR                           | 7                | gi 242117893 ref        | BAX                      | True         | False           | True        |
|                          | MDGSGEQPRGGGPTSSEQIMK             | 21               | gi 242117893 ref        | BAX                      | True         | False           | True        |
|                          | MDGSGEQPR                         | 9                | gi 242117893 ref        | BAX                      | True         | False           | True        |
|                          | MGGEAPELALDPVPQDASTK              | 20               | gi 242117893 ref        | BAX                      | True         | False           | True        |
|                          | MGGEAPELALDPVPQDASTKK             | 21               | gi 242117893 ref        | BAX                      | True         | False           | True        |
|                          | MIAAVDTDSPREFFR                   | 16               | gi 242117893 ref        | BAX                      | True         | False           | True        |
|                          | MIAAVDTDSPR                       | 11               | gi 242117893 ref        | BAX                      | True         | False           | True        |
|                          | RIGDELDNMEQLR                     | 14               | gi 242117893 ref        | BAX                      | True         | False           | True        |
|                          | TGALLLQGFIQDR                     | 13               | gi 242117893 ref        | BAX                      | True         | False           | True        |
|                          | TIMGWTLDFLR                       | 11               | gi 242117893 ref        | BAX                      | True         | False           | True        |
|                          | VAADMFSGDGNFNWGR                  | 15               | gi 242117893 ref        | BAX                      | True         | False           | True        |
|                          | VVALFYFASK                        | 10               | gi 242117893 ref        | BAX                      | True         | False           | True        |
|                          | <b>VPELIR</b>                     | <b>6</b>         | <b>gi 4502053 ref </b>  | <b>ALOX12B;BAX;CLIP4</b> | <b>False</b> | <b>False</b>    | <b>True</b> |
| BAK                      | ASGQGPGR                          | 10               | gi 4502363 ref          | BAK1                     | True         | True            | False       |
|                          | FVDFMLHHCIAK                      | 13               | gi 4502363 ref          | BAK1                     | True         | True            | False       |
|                          | HQQEQEAEGVAAPADPEMVTLPQPSSTMGC    | 34               | gi 4502363 ref          | BAK1                     | True         | True            | False       |
|                          | IATSLFESGINWGR                    | 14               | gi 4502363 ref          | BAK1                     | True         | True            | False       |
|                          | LALHVYQHGLTGFLGQVTR               | 19               | gi 4502363 ref          | BAK1                     | True         | True            | False       |
|                          | MASGQGPGR                         | 11               | gi 4502363 ref          | BAK1                     | True         | True            | False       |
|                          | QECGEPALPSASEEQVAQDTEEVFR         | 25               | gi 4502363 ref          | BAK1                     | True         | True            | False       |
|                          | QLAIIGDDINR                       | 11               | gi 4502363 ref          | BAK1                     | True         | True            | False       |
|                          | QLAIIGDDINRR                      | 12               | gi 4502363 ref          | BAK1                     | True         | True            | False       |
|                          | SYVFYR                            | 6                | gi 4502363 ref          | BAK1                     | True         | True            | False       |
|                          | VVALLGFGYR                        | 10               | gi 4502363 ref          | BAK1                     | True         | True            | False       |
| YDFEQTMLQHLQPTAENAYEYFTK | 25                                | gi 4502363 ref   | BAK1                    | True                     | True         | False           |             |
| BCL-2                    | DFAEMSSQLHLTPFTAR                 | 17               | gi 72198189 ref         | BCL2                     | True         | False           | True        |
|                          | FATVVEELFR                        | 10               | gi 72198189 ref         | BCL2                     | True         | False           | True        |
|                          | GYEWDAGDVGAAPPGAAPAPGIFSSQPGHTP   | 42               | gi 72198189 ref         | BCL2                     | True         | False           | True        |
|                          | GYEWDAGDVGAAPPGAAPAPGIFSSQPGHTP   | 37               | gi 72198189 ref         | BCL2                     | True         | False           | True        |
|                          | QAGDDFSR                          | 8                | gi 72198189 ref         | BCL2                     | True         | False           | True        |
|                          | TSPLQTPAAPGAAAGPALSPPVPPVHLLTR    | 30               | gi 72198189 ref         | BCL2                     | True         | False           | True        |
| BCL-XL                   | AFSDLTSQLHITPGTAYQSFEQVVNELFR     | 29               | gi 20336335 ref         | BCL2L1                   | True         | True            | False       |
|                          | EAGDEFELR                         | 9                | gi 4502381 ref          | BCL2L1                   | True         | False           | True        |
|                          | ELVVDFLSYK                        | 10               | gi 4502381 ref          | BCL2L1                   | True         | False           | True        |
|                          | EMQVLVSR                          | 8                | gi 20336335 ref         | BCL2L1                   | True         | True            | False       |
|                          | EVIPMAAVK                         | 9                | gi 4502381 ref          | BCL2L1                   | True         | False           | True        |
|                          | GYSWSQFSDVEENR                    | 14               | gi 4502381 ref          | BCL2L1                   | True         | False           | True        |
| QALREAGDEFELR            | 13                                | gi 4502381 ref   | BCL2L1                  | True                     | False        | True            |             |
| BCL-2/BCL-XL             | <b>DGVNWGR</b>                    | <b>7</b>         | <b>gi 72198189 ref </b> | <b>BCL2L1;BCL2</b>       | <b>False</b> | <b>False</b>    | <b>True</b> |
| MCL-1                    | LLFFAPTR                          | 8                | gi 11386165 ref         | MCL1                     | True         | False           | True        |
|                          | NHETAFQGMLR                       | 11               | gi 11386165 ref         | MCL1                     | True         | False           | True        |
|                          | TINQESCIEPLAESITDVLVR             | 21               | gi 11386165 ref         | MCL1                     | True         | False           | True        |
|                          | VARPPPIGAEVPDVTATPAR              | 20               | gi 11386165 ref         | MCL1                     | True         | False           | True        |
|                          | <b>KALETLR</b>                    | <b>7</b>         | <b>gi 19924129 ref </b> | <b>MCL1;RAD50</b>        | <b>False</b> | <b>False</b>    | <b>True</b> |
|                          | <b>ALETLR</b>                     | <b>6</b>         | <b>gi 54792138 ref </b> | <b>RAD50;MCL1;HELZ</b>   | <b>False</b> | <b>False</b>    | <b>True</b> |
| BIM                      | IGDEFNAYYAR                       | 11               | gi 5729740 ref          | BCL2L11                  | True         | False           | True        |
|                          | QAEPADMRIWIAQELR                  | 18               | gi 5729740 ref          | BCL2L11                  | True         | False           | True        |
|                          | QLQPAERPPQLRPGAPTSLQTEPQDRSPAPMSG | 63               | gi 323362973 ref        | BCL2L11                  | True         | True            | False       |
|                          | QPSDVSSECDR                       | 11               | gi 5729740 ref          | BCL2L11                  | True         | False           | True        |
|                          | VFLNNYQAAEDHPR                    | 14               | gi 5729740 ref          | BCL2L11                  | True         | False           | True        |
| BID                      | DLATALEQLLQAYPRDMEKEK             | 21               | gi 347300410 ref        | BID                      | True         | False           | True        |
|                          | DLATALEQLLQAYPR                   | 15               | gi 347300410 ref        | BID                      | True         | False           | True        |
|                          | DVFHTTVNFNQNLK                    | 15               | gi 347300410 ref        | BID                      | True         | False           | True        |
|                          | ELDALGHELPLVLAQWEGYDELQTDGNR      | 28               | gi 347300410 ref        | BID                      | True         | False           | True        |
|                          | HLAQVGDSDMR                       | 11               | gi 347300410 ref        | BID                      | True         | False           | True        |
|                          | IEADSESQEDIIR                     | 13               | gi 347300410 ref        | BID                      | True         | False           | True        |
|                          | KVASHTPSLLR                       | 11               | gi 347300410 ref        | BID                      | True         | False           | True        |
|                          | LGRIEADSESQEDIIR                  | 16               | gi 347300410 ref        | BID                      | True         | False           | True        |
|                          | RELDALGHELPLVLAQWEGYDELQTDGNR     | 29               | gi 347300410 ref        | BID                      | True         | False           | True        |
|                          | SIPPGLVNGLALQLR                   | 15               | gi 347300410 ref        | BID                      | True         | False           | True        |
|                          | TMLVLALLAK                        | 11               | gi 347300410 ref        | BID                      | True         | False           | True        |
| VASHTPSLLR               | 10                                | gi 347300410 ref | BID                     | True                     | False        | True            |             |



| Protein                     | Peptide                           | Length          | Protein Accession | Gene Symbol             | Genespecific | IsoformSpecific | Shared |
|-----------------------------|-----------------------------------|-----------------|-------------------|-------------------------|--------------|-----------------|--------|
| Caspase 3                   | DGSWFIQSLCAMLK                    | 14              | gi 14790119 ref   | CASP3                   | True         | False           | True   |
|                             | EEIVELMR                          | 8               | gi 14790119 ref   | CASP3                   | True         | False           | True   |
|                             | ELYFYH                            | 6               | gi 14790119 ref   | CASP3                   | True         | False           | True   |
|                             | GTELDCGIETDSGVDDDMACHK            | 22              | gi 14790119 ref   | CASP3                   | True         | False           | True   |
|                             | GTELDCGIETDSGVDDDMACHKIPVEADFLYAY | 43              | gi 14790119 ref   | CASP3                   | True         | False           | True   |
|                             | IHGSESMDSGISLDNSYK                | 19              | gi 14790119 ref   | CASP3                   | True         | False           | True   |
|                             | IPVEADFLYAYSTAPGYYSWR             | 21              | gi 14790119 ref   | CASP3                   | True         | False           | True   |
|                             | ITNFFR                            | 6               | gi 14790119 ref   | CASP3                   | True         | False           | True   |
|                             | KITNFFR                           | 7               | gi 14790119 ref   | CASP3                   | True         | False           | True   |
|                             | LEFMHILTR                         | 9               | gi 14790119 ref   | CASP3                   | True         | False           | True   |
|                             | LFIIQACR                          | 8               | gi 14790119 ref   | CASP3                   | True         | False           | True   |
|                             | MDYPEMGLCIINNK                    | 15              | gi 14790119 ref   | CASP3                   | True         | False           | True   |
|                             | MENTENSVDSK                       | 11              | gi 14790119 ref   | CASP3                   | True         | False           | True   |
|                             | NKNDLTREEIVELMR                   | 15              | gi 14790119 ref   | CASP3                   | True         | False           | True   |
|                             | NKNDLTR                           | 7               | gi 14790119 ref   | CASP3                   | True         | False           | True   |
|                             | NLKEYVR                           | 7               | gi 14790119 ref   | CASP3                   | True         | False           | True   |
|                             | QIPCIVSM LTK                      | 11              | gi 14790119 ref   | CASP3                   | True         | False           | True   |
|                             | QYADKLEFMHILTR                    | 14              | gi 14790119 ref   | CASP3                   | True         | False           | True   |
|                             | SGTDVDAANLR                       | 11              | gi 14790119 ref   | CASP3                   | True         | False           | True   |
|                             | SLTGKPK                           | 7               | gi 14790119 ref   | CASP3                   | True         | False           | True   |
| SSFVCVLLSHGEEGIIFGTNGPVDLKK | 27                                | gi 14790119 ref | CASP3             | True                    | False        | True            |        |
| STGMTSR                     | 7                                 | gi 14790119 ref | CASP3             | True                    | False        | True            |        |
| VATEFESFSFDATFHAK           | 17                                | gi 14790119 ref | CASP3             | True                    | False        | True            |        |
| XIAP                        | AGFLYTGE GDTV R                   | 13              | gi 32528299 ref   | XIAP                    | True         | False           | True   |
|                             | AGFYALGEGDKVK                     | 13              | gi 32528299 ref   | XIAP                    | True         | False           | True   |
|                             | DHFALDRPSETHADYLLR                | 18              | gi 32528299 ref   | XIAP                    | True         | False           | True   |
|                             | DSMQDESSQTS LQK                   | 14              | gi 32528299 ref   | XIAP                    | True         | False           | True   |
|                             | EEEFVEEFNR                        | 10              | gi 32528299 ref   | XIAP                    | True         | False           | True   |
|                             | EISTEEQLR                         | 9               | gi 32528299 ref   | XIAP                    | True         | False           | True   |
|                             | GQEYINNIHLTHSLEECLVR              | 20              | gi 32528299 ref   | XIAP                    | True         | False           | True   |
|                             | IQISGSNYK                         | 9               | gi 32528299 ref   | XIAP                    | True         | False           | True   |
|                             | NPAMYSEEAR                        | 10              | gi 32528299 ref   | XIAP                    | True         | False           | True   |
|                             | NPSMADYEAR                        | 10              | gi 32528299 ref   | XIAP                    | True         | False           | True   |
|                             | SESDAVSSDR                        | 10              | gi 32528299 ref   | XIAP                    | True         | False           | True   |
|                             | SFQNWPDYAH LTPR                   | 14              | gi 32528299 ref   | XIAP                    | True         | False           | True   |
|                             | SLEVLVADLVNAQK                    | 14              | gi 32528299 ref   | XIAP                    | True         | False           | True   |
|                             | TCVPADINKEEEFVEEFNR               | 19              | gi 32528299 ref   | XIAP                    | True         | False           | True   |
|                             | TCVPADINKEEEFVEEFNRLK             | 21              | gi 32528299 ref   | XIAP                    | True         | False           | True   |
|                             | TFANFPGSPVSASTLAR                 | 18              | gi 32528299 ref   | XIAP                    | True         | False           | True   |
|                             | TGQVVDISDTIYPR                    | 14              | gi 32528299 ref   | XIAP                    | True         | False           | True   |
| TPSLTR                      | 6                                 | gi 32528299 ref | XIAP              | True                    | False        | True            |        |
| VENYLGSR                    | 8                                 | gi 32528299 ref | XIAP              | True                    | False        | True            |        |
| WQYGDSAVGR                  | 10                                | gi 32528299 ref | XIAP              | True                    | False        | True            |        |
| APAF-1                      | HILDEK                            | 6               | gi 22749293 ref   | FANCB;APAF1             | False        | False           | True   |
|                             | SVMGPK                            | 6               | gi 7108333 ref    | HDLBP;APAF1             | False        | False           | True   |
|                             | GHL LGR                           | 6               | gi 13994259 ref   | AF5;RPL13A;MRP55;AGPS;A | False        | False           | True   |
|                             | FSPDDK                            | 6               | gi 8922301 ref    | VDR70;FER1L5;APAF1;NOP1 | False        | False           | True   |
|                             | ADLPEQAHSI IK                     | 12              | gi 7108333 ref    | APAF1                   | True         | False           | True   |
|                             | AFDSQCQILLTTR                     | 13              | gi 7108333 ref    | APAF1                   | True         | False           | True   |
|                             | AHEDEVLCCAFSTDDR                  | 16              | gi 7108333 ref    | APAF1                   | True         | False           | True   |
|                             | DFVCHQGTVLSCDISHDATK              | 20              | gi 7108333 ref    | APAF1                   | True         | False           | True   |
|                             | DKSVTDSVMGPK                      | 12              | gi 7108333 ref    | APAF1                   | True         | False           | True   |
|                             | DLAALLHDGIPVSSSSGK                | 19              | gi 32483359 ref   | APAF1                   | True         | False           | True   |
|                             | DNDSYVSFY NALLHEGYK               | 18              | gi 7108333 ref    | APAF1                   | True         | False           | True   |
|                             | DSVSGITSYVR                       | 11              | gi 32483359 ref   | APAF1                   | True         | False           | True   |
|                             | DYYTDL SILQK                      | 11              | gi 7108333 ref    | APAF1                   | True         | False           | True   |
|                             | ECKVVER                           | 7               | gi 32483363 ref   | APAF1                   | True         | True            | False  |
|                             | EDIKDYTTDLSILQK                   | 15              | gi 7108333 ref    | APAF1                   | True         | False           | True   |
|                             | FIATCSVDK                         | 9               | gi 7108333 ref    | APAF1                   | True         | False           | True   |
|                             | FIATCSVDKK                        | 10              | gi 7108333 ref    | APAF1                   | True         | False           | True   |
|                             | GHQETVKDFR                        | 10              | gi 7108333 ref    | APAF1                   | True         | False           | True   |
|                             | GSPLVSLIGALLR                     | 14              | gi 7108333 ref    | APAF1                   | True         | False           | True   |
|                             | HILDEKDCAVSENFQEFSLNGLHLLGR       | 27              | gi 7108333 ref    | APAF1                   | True         | False           | True   |
|                             | IHVSPDFK                          | 8               | gi 7108333 ref    | APAF1                   | True         | False           | True   |
|                             | IITQFQR                           | 7               | gi 7108333 ref    | APAF1                   | True         | False           | True   |
|                             | IWSFDLLLPLHEL R                   | 14              | gi 7108333 ref    | APAF1                   | True         | False           | True   |
|                             | KADLPEQAHSI IK                    | 13              | gi 7108333 ref    | APAF1                   | True         | False           | True   |
|                             | KIHVSPDFK                         | 9               | gi 7108333 ref    | APAF1                   | True         | False           | True   |
|                             | KLVNAIQQK                         | 9               | gi 7108333 ref    | APAF1                   | True         | False           | True   |
|                             | LDQDESFSQR                        | 10              | gi 7108333 ref    | APAF1                   | True         | False           | True   |
|                             | LLASCSADGTLK                      | 12              | gi 7108333 ref    | APAF1                   | True         | False           | True   |
|                             | LLSWSFDGTVK                       | 11              | gi 7108333 ref    | APAF1                   | True         | False           | True   |
|                             | LPLNIEEAKDR                       | 11              | gi 7108333 ref    | APAF1                   | True         | False           | True   |
|                             | LPLNIEEAK                         | 9               | gi 7108333 ref    | APAF1                   | True         | False           | True   |
|                             | LQNLCTR                           | 7               | gi 7108333 ref    | APAF1                   | True         | False           | True   |
|                             | LVNAIQQK                          | 8               | gi 7108333 ref    | APAF1                   | True         | False           | True   |
|                             | LVVRPHTDAVYHACFSE DGQR            | 21              | gi 7108333 ref    | APAF1                   | True         | False           | True   |
|                             | LWDATSANER                        | 10              | gi 7108333 ref    | APAF1                   | True         | False           | True   |
|                             | LWDLNQK                           | 7               | gi 7108333 ref    | APAF1                   | True         | False           | True   |
|                             | NCLLQHR                           | 7               | gi 7108333 ref    | APAF1                   | True         | False           | True   |
|                             | NCSQLQDLHK                        | 10              | gi 7108333 ref    | APAF1                   | True         | False           | True   |
|                             | NEPTQQQR                          | 8               | gi 7108333 ref    | APAF1                   | True         | False           | True   |
|                             | NITNLSR                           | 7               | gi 7108333 ref    | APAF1                   | True         | False           | True   |
| NTMFGHTNSVNHCR              | 14                                | gi 7108333 ref  | APAF1             | True                    | False        | True            |        |
| QFFLNLEDPQEDMEVIVK          | 18                                | gi 7108333 ref  | APAF1             | True                    | False        | True            |        |
| QFFPNIVQLGLCEPETSEVYQQA K   | 24                                | gi 7108333 ref  | APAF1             | True                    | False        | True            |        |
| SLLFCDR                     | 7                                 | gi 7108333 ref  | APAF1             | True                    | False        | True            |        |
| SVLAAEAVR                   | 9                                 | gi 7108333 ref  | APAF1             | True                    | False        | True            |        |
| SVTDSVMGPK                  | 10                                | gi 7108333 ref  | APAF1             | True                    | False        | True            |        |
| TELVGPAHLIHEFVEYR           | 17                                | gi 7108333 ref  | APAF1             | True                    | False        | True            |        |
| TLQVFK                      | 6                                 | gi 7108333 ref  | APAF1             | True                    | False        | True            |        |
| TVLCEGGVPQRPVVFVTR          | 18                                | gi 7108333 ref  | APAF1             | True                    | False        | True            |        |
| VWNIITGNK                   | 9                                 | gi 7108333 ref  | APAF1             | True                    | False        | True            |        |
| WEYYLK                      | 6                                 | gi 7108333 ref  | APAF1             | True                    | False        | True            |        |
| YVVPVSSLGKEK                | 13                                | gi 7108333 ref  | APAF1             | True                    | False        | True            |        |
| YVVPVSSLGK                  | 11                                | gi 7108333 ref  | APAF1             | True                    | False        | True            |        |
| YYLHDLQVDFLTEK              | 14                                | gi 7108333 ref  | APAF1             | True                    | False        | True            |        |



| Protein                         | Peptide                         | Length          | Protein Accession | Gene Symbol | Genespecific | IsoformSpecific | Shared |
|---------------------------------|---------------------------------|-----------------|-------------------|-------------|--------------|-----------------|--------|
| CIAP                            | ILTTGENYK                       | 9               | gi 4502141 ref    | BIRC2       | True         | True            | False  |
|                                 | LGDSPIQK                        | 8               | gi 4502141 ref    | BIRC2       | True         | True            | False  |
|                                 | QAEEMASDDLIR                    | 14              | gi 4502141 ref    | BIRC2       | True         | True            | False  |
|                                 | TNPYSYAMSTEEAR                  | 14              | gi 4502141 ref    | BIRC2       | True         | True            | False  |
|                                 | YDFSCELYR                       | 9               | gi 4502141 ref    | BIRC2       | True         | True            | False  |
|                                 | YIPTEDVSGLSLEEQLR               | 17              | gi 4502141 ref    | BIRC2       | True         | True            | False  |
|                                 | STEEAR                          | 6               | gi 4502141 ref    | BIRC2;GPI   | False        | False           | True   |
|                                 | AGFYIIGPGDR                     | 11              | gi 4502141 ref    | BIRC3;BIRC2 | False        | False           | True   |
|                                 | ELIDTILVK                       | 9               | gi 4502141 ref    | BIRC3;BIRC2 | False        | False           | True   |
|                                 | MSTYSTFPAGVVPVSR                | 16              | gi 4502141 ref    | BIRC3;BIRC2 | False        | False           | True   |
| VACFACGGK                       | 9                               | gi 4502141 ref  | BIRC3;BIRC2       | False       | False        | True            |        |
| VDAC1                           | AVPPTYADLGLK                    | 11              | gi 4507879 ref    | VDAC1       | True         | True            | False  |
|                                 | AVPPTYADLGKSARDVFTK             | 19              | gi 4507879 ref    | VDAC1       | True         | True            | False  |
|                                 | AVPPTYADLGKSAR                  | 14              | gi 4507879 ref    | VDAC1       | True         | True            | False  |
|                                 | EHINLGCDMDFDIAGPSIR             | 19              | gi 4507879 ref    | VDAC1       | True         | True            | False  |
|                                 | GALVLGYEGWLAGYQMNFTAK           | 22              | gi 4507879 ref    | VDAC1       | True         | True            | False  |
|                                 | GLKLTDFSSFPNTGKK                | 17              | gi 4507879 ref    | VDAC1       | True         | True            | False  |
|                                 | GYGFGLIK                        | 8               | gi 4507879 ref    | VDAC1       | True         | True            | False  |
|                                 | GYGFGLIKLDLK                    | 12              | gi 4507879 ref    | VDAC1       | True         | True            | False  |
|                                 | IKTGYK                          | 6               | gi 4507879 ref    | VDAC1       | True         | True            | False  |
|                                 | IKTGYKR                         | 7               | gi 4507879 ref    | VDAC1       | True         | True            | False  |
|                                 | KLETAVNLAWTAGNSNTR              | 18              | gi 4507879 ref    | VDAC1       | True         | True            | False  |
|                                 | LETAVNLAWTAGNSNTR               | 17              | gi 4507879 ref    | VDAC1       | True         | True            | False  |
|                                 | LTFDSSFPNTGK                    | 13              | gi 4507879 ref    | VDAC1       | True         | True            | False  |
|                                 | LTFDSSFPNTGKK                   | 14              | gi 4507879 ref    | VDAC1       | True         | True            | False  |
|                                 | LTLALLDGK                       | 10              | gi 4507879 ref    | VDAC1       | True         | True            | False  |
|                                 | LTLALLDGKNNVAGGHK               | 18              | gi 4507879 ref    | VDAC1       | True         | True            | False  |
|                                 | NVNAGGHK                        | 8               | gi 4507879 ref    | VDAC1       | True         | True            | False  |
|                                 | NVNAGGHKGLGLEFQA                | 17              | gi 4507879 ref    | VDAC1       | True         | True            | False  |
|                                 | REHINLGCDMDFDIAGPSIR            | 20              | gi 4507879 ref    | VDAC1       | True         | True            | False  |
|                                 | SENGLEFTSSGSANTETTK             | 19              | gi 4507879 ref    | VDAC1       | True         | True            | False  |
|                                 | SENGLEFTSSGSANTETTKVTSLETK      | 27              | gi 4507879 ref    | VDAC1       | True         | True            | False  |
|                                 | SRVTQSNFAVGYK                   | 13              | gi 4507879 ref    | VDAC1       | True         | True            | False  |
|                                 | SRVTQSNFAVGYKDEFQLHTNVNDGTEFGGS | 36              | gi 4507879 ref    | VDAC1       | True         | True            | False  |
|                                 | TDEFQLHTNVNDGTEFGGSYQK          | 23              | gi 4507879 ref    | VDAC1       | True         | True            | False  |
|                                 | TDEFQLHTNVNDGTEFGGSYQKVNK       | 26              | gi 4507879 ref    | VDAC1       | True         | True            | False  |
|                                 | TKSENGLEFTSSGSANTETTK           | 21              | gi 4507879 ref    | VDAC1       | True         | True            | False  |
|                                 | TKSENGLEFTSSGSANTETTKVTSLETK    | 29              | gi 4507879 ref    | VDAC1       | True         | True            | False  |
|                                 | VNNSLIGLGYTQLKPGIK              | 20              | gi 4507879 ref    | VDAC1       | True         | True            | False  |
|                                 | VTGSLETK                        | 8               | gi 4507879 ref    | VDAC1       | True         | True            | False  |
|                                 | VTGSLETKYR                      | 10              | gi 4507879 ref    | VDAC1       | True         | True            | False  |
| VTQSNFAVGYK                     | 11                              | gi 4507879 ref  | VDAC1             | True        | True         | False           |        |
| VTQSNFAVGYKDEFQLHTNVNDGTEFGGSYK | 34                              | gi 4507879 ref  | VDAC1             | True        | True         | False           |        |
| VTQSNFAVGYKDEFQLHTNVNDGTEFGGSYK | 37                              | gi 4507879 ref  | VDAC1             | True        | True         | False           |        |
| WNTDNTLGTETVEDQLAR              | 19                              | gi 4507879 ref  | VDAC1             | True        | True         | False           |        |
| WTEYGLTFTEK                     | 11                              | gi 4507879 ref  | VDAC1             | True        | True         | False           |        |
| WTEYGLTFTEKWNTDNTLGTETVEDQLAR   | 30                              | gi 4507879 ref  | VDAC1             | True        | True         | False           |        |
| YQIDPDACFSAK                    | 12                              | gi 4507879 ref  | VDAC1             | True        | True         | False           |        |
| YRWTEYGLTFTEK                   | 13                              | gi 4507879 ref  | VDAC1             | True        | True         | False           |        |
| FGIAAK                          | 6                               | gi 42476281 ref | VDAC3;VDAC2;VDAC1 | False       | False        | True            |        |
| Caspase 9                       | DHGFEVASTPEDESPPSNPEPDATPFQEGLR | 32              | gi 14790124 ref   | CASP9       | True         | False           | True   |
|                                 | ELFRPHMIEDIQR                   | 13              | gi 14790124 ref   | CASP9       | True         | True            | False  |
|                                 | GNADLAYILSMPECGHCLINNVNFCR      | 27              | gi 14790124 ref   | CASP9       | True         | False           | True   |
|                                 | KPEVLRPETPRPVDIGSGGFGDVGALESLR  | 30              | gi 14790124 ref   | CASP9       | True         | False           | True   |
|                                 | LFYIACGGGEQK                    | 12              | gi 14790124 ref   | CASP9       | True         | False           | True   |
|                                 | LSKPTLENLTPVLRPEIR              | 19              | gi 14790124 ref   | CASP9       | True         | False           | True   |
|                                 | QLIIDLETR                       | 9               | gi 14790124 ref   | CASP9       | True         | True            | False  |
|                                 | VANAVSVK                        | 8               | gi 14790124 ref   | CASP9       | True         | False           | True   |
| Caspase 8                       | AQISAYR                         | 7               | gi 15718704 ref   | CASP8       | True         | False           | True   |
|                                 | CKLDDMNLLDIFIEMEK               | 18              | gi 15718704 ref   | CASP8       | True         | False           | True   |
|                                 | CPSLAGKPK                       | 9               | gi 15718704 ref   | CASP8       | True         | False           | True   |
|                                 | DALMLFQR                        | 8               | gi 15718704 ref   | CASP8       | True         | False           | True   |
|                                 | EQDSESQTLDK                     | 11              | gi 15718704 ref   | CASP8       | True         | False           | True   |
|                                 | FLLQEEISK                       | 9               | gi 15718704 ref   | CASP8       | True         | False           | True   |
|                                 | FLSLDYIPQR                      | 10              | gi 15718704 ref   | CASP8       | True         | False           | True   |
|                                 | GDDILTILTEVNYEVSNDKDKK          | 22              | gi 15718704 ref   | CASP8       | True         | False           | True   |
|                                 | GDDILTILTEVNYEVSNK              | 18              | gi 15718704 ref   | CASP8       | True         | False           | True   |
|                                 | GIYGTGQGEAPIYELTSQFTGLK         | 24              | gi 15718704 ref   | CASP8       | True         | False           | True   |
|                                 | GIPVETDSEEQPYLEMDLSSPQTR        | 24              | gi 15718704 ref   | CASP8       | True         | False           | True   |
|                                 | GYCLINHNHFAK                    | 13              | gi 15718704 ref   | CASP8       | True         | False           | True   |
|                                 | IINDYEEFSKER                    | 12              | gi 15718706 ref   | CASP8       | True         | False           | True   |
|                                 | IINDYEEFSK                      | 10              | gi 15718704 ref   | CASP8       | True         | False           | True   |
|                                 | INRLDLLITYLNTR                  | 14              | gi 15718704 ref   | CASP8       | True         | False           | True   |
|                                 | KQEPKDALMLFQR                   | 14              | gi 15718704 ref   | CASP8       | True         | False           | True   |
|                                 | LDDDMNLLDIFIEMEK                | 16              | gi 15718704 ref   | CASP8       | True         | False           | True   |
|                                 | LGDSETAMVPGK                    | 12              | gi 122056476 ref  | CASP8       | True         | True            | False  |
|                                 | MLEESNLSFLK                     | 11              | gi 15718704 ref   | CASP8       | True         | False           | True   |
|                                 | NLYDIGEQDSEDLASLK               | 18              | gi 15718704 ref   | CASP8       | True         | False           | True   |
|                                 | NPAEGTWYIQLCQSLR                | 17              | gi 15718704 ref   | CASP8       | True         | False           | True   |
|                                 | QEPKDALMLFQR                    | 13              | gi 15718704 ref   | CASP8       | True         | False           | True   |
|                                 | QMPQPTFTLR                      | 10              | gi 15718704 ref   | CASP8       | True         | False           | True   |
|                                 | QTSGLSDHQSSQFCK                 | 16              | gi 15718712 ref   | CASP8       | True         | True            | False  |
| VCAQINK                         | 7                               | gi 15718704 ref | CASP8             | True        | False        | True            |        |
| VFFIQACQGDNYQK                  | 14                              | gi 15718704 ref | CASP8             | True        | False        | True            |        |
| VILGEGK                         | 7                               | gi 15718704 ref | CASP8             | True        | False        | True            |        |
| VMLYQISEEVS                     | 12                              | gi 15718704 ref | CASP8             | True        | False        | True            |        |

Footnote: peptides marked in red were excluded from analysis due to insufficient specificity.



**Table S2: Mass spectrometry peptide details (Related to Figure 1).**

| Protein   | Total peptides analyzed | Total gene-specific peptides analyzed | Total gene-specific peptides detected (all tissues) | Total gene-specific peptides detected (Adult B Cells) |
|-----------|-------------------------|---------------------------------------|-----------------------------------------------------|-------------------------------------------------------|
| BAX       | 19                      | 18                                    | 17                                                  | 12                                                    |
| BAK       | 12                      | 12                                    | 9                                                   | 6                                                     |
| BCL-2     | 7                       | 6                                     | 6                                                   | 5                                                     |
| BCL-XL    | 8                       | 7                                     | 4                                                   | 0                                                     |
| MCL-1     | 6                       | 4                                     | 4                                                   | 0                                                     |
| BIM       | 5                       | 5                                     | 4                                                   | 3                                                     |
| BID       | 12                      | 12                                    | 12                                                  | 9                                                     |
| APAF-1    | 54                      | 50                                    | 38                                                  | 16                                                    |
| Caspase 3 | 23                      | 23                                    | 20                                                  | 7                                                     |
| XIAP      | 20                      | 20                                    | 14                                                  | 2                                                     |
| CIAP      | 11                      | 6                                     | 3                                                   | 0                                                     |
| VDAC1     | 39                      | 38                                    | 35                                                  | 16                                                    |
| Caspase 9 | 8                       | 8                                     | 4                                                   | 3                                                     |
| Caspase 8 | 28                      | 28                                    | 26                                                  | 18                                                    |



**A**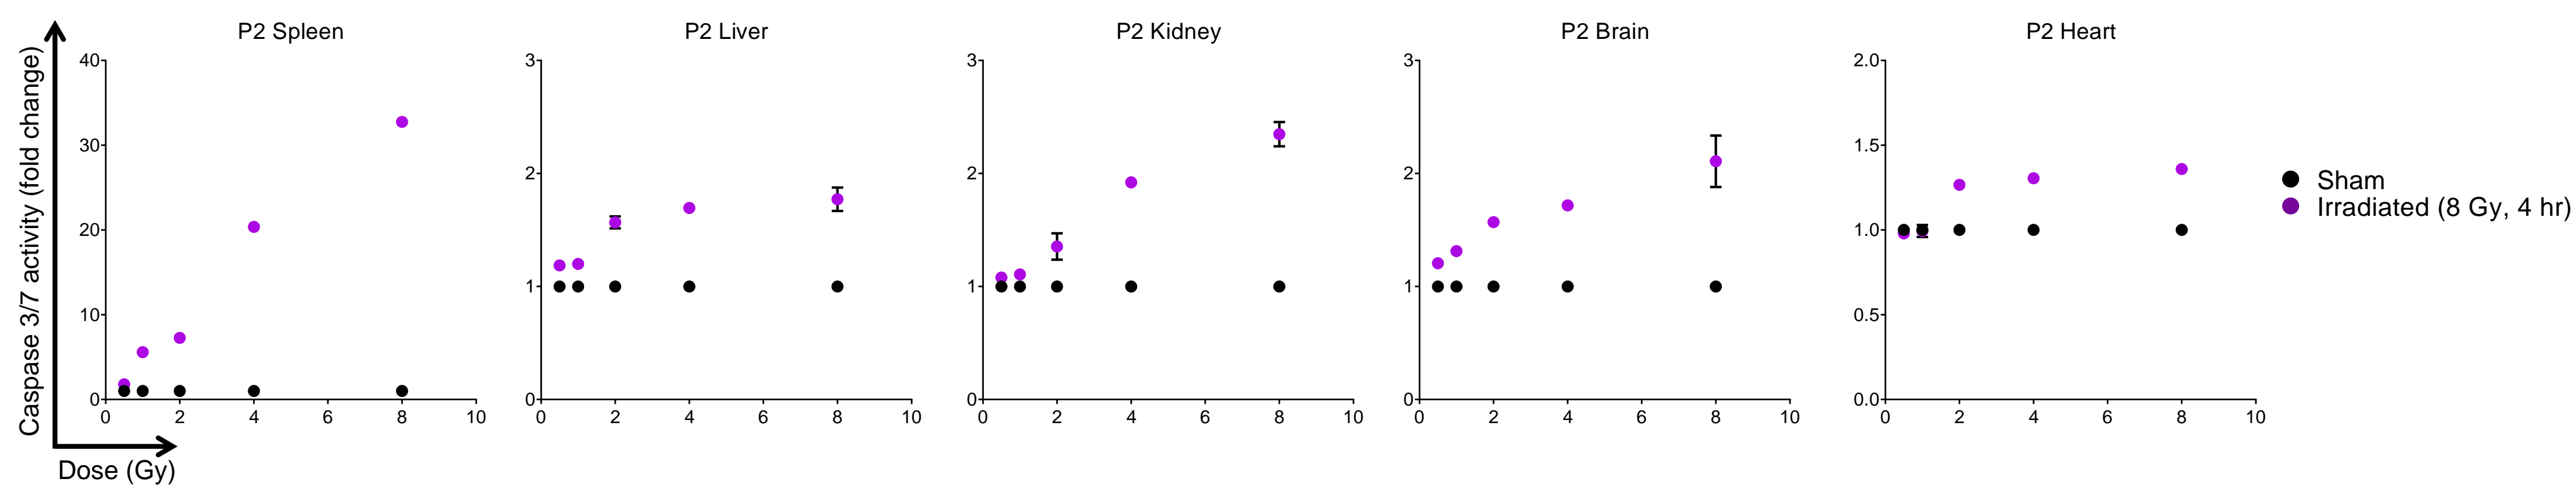**B**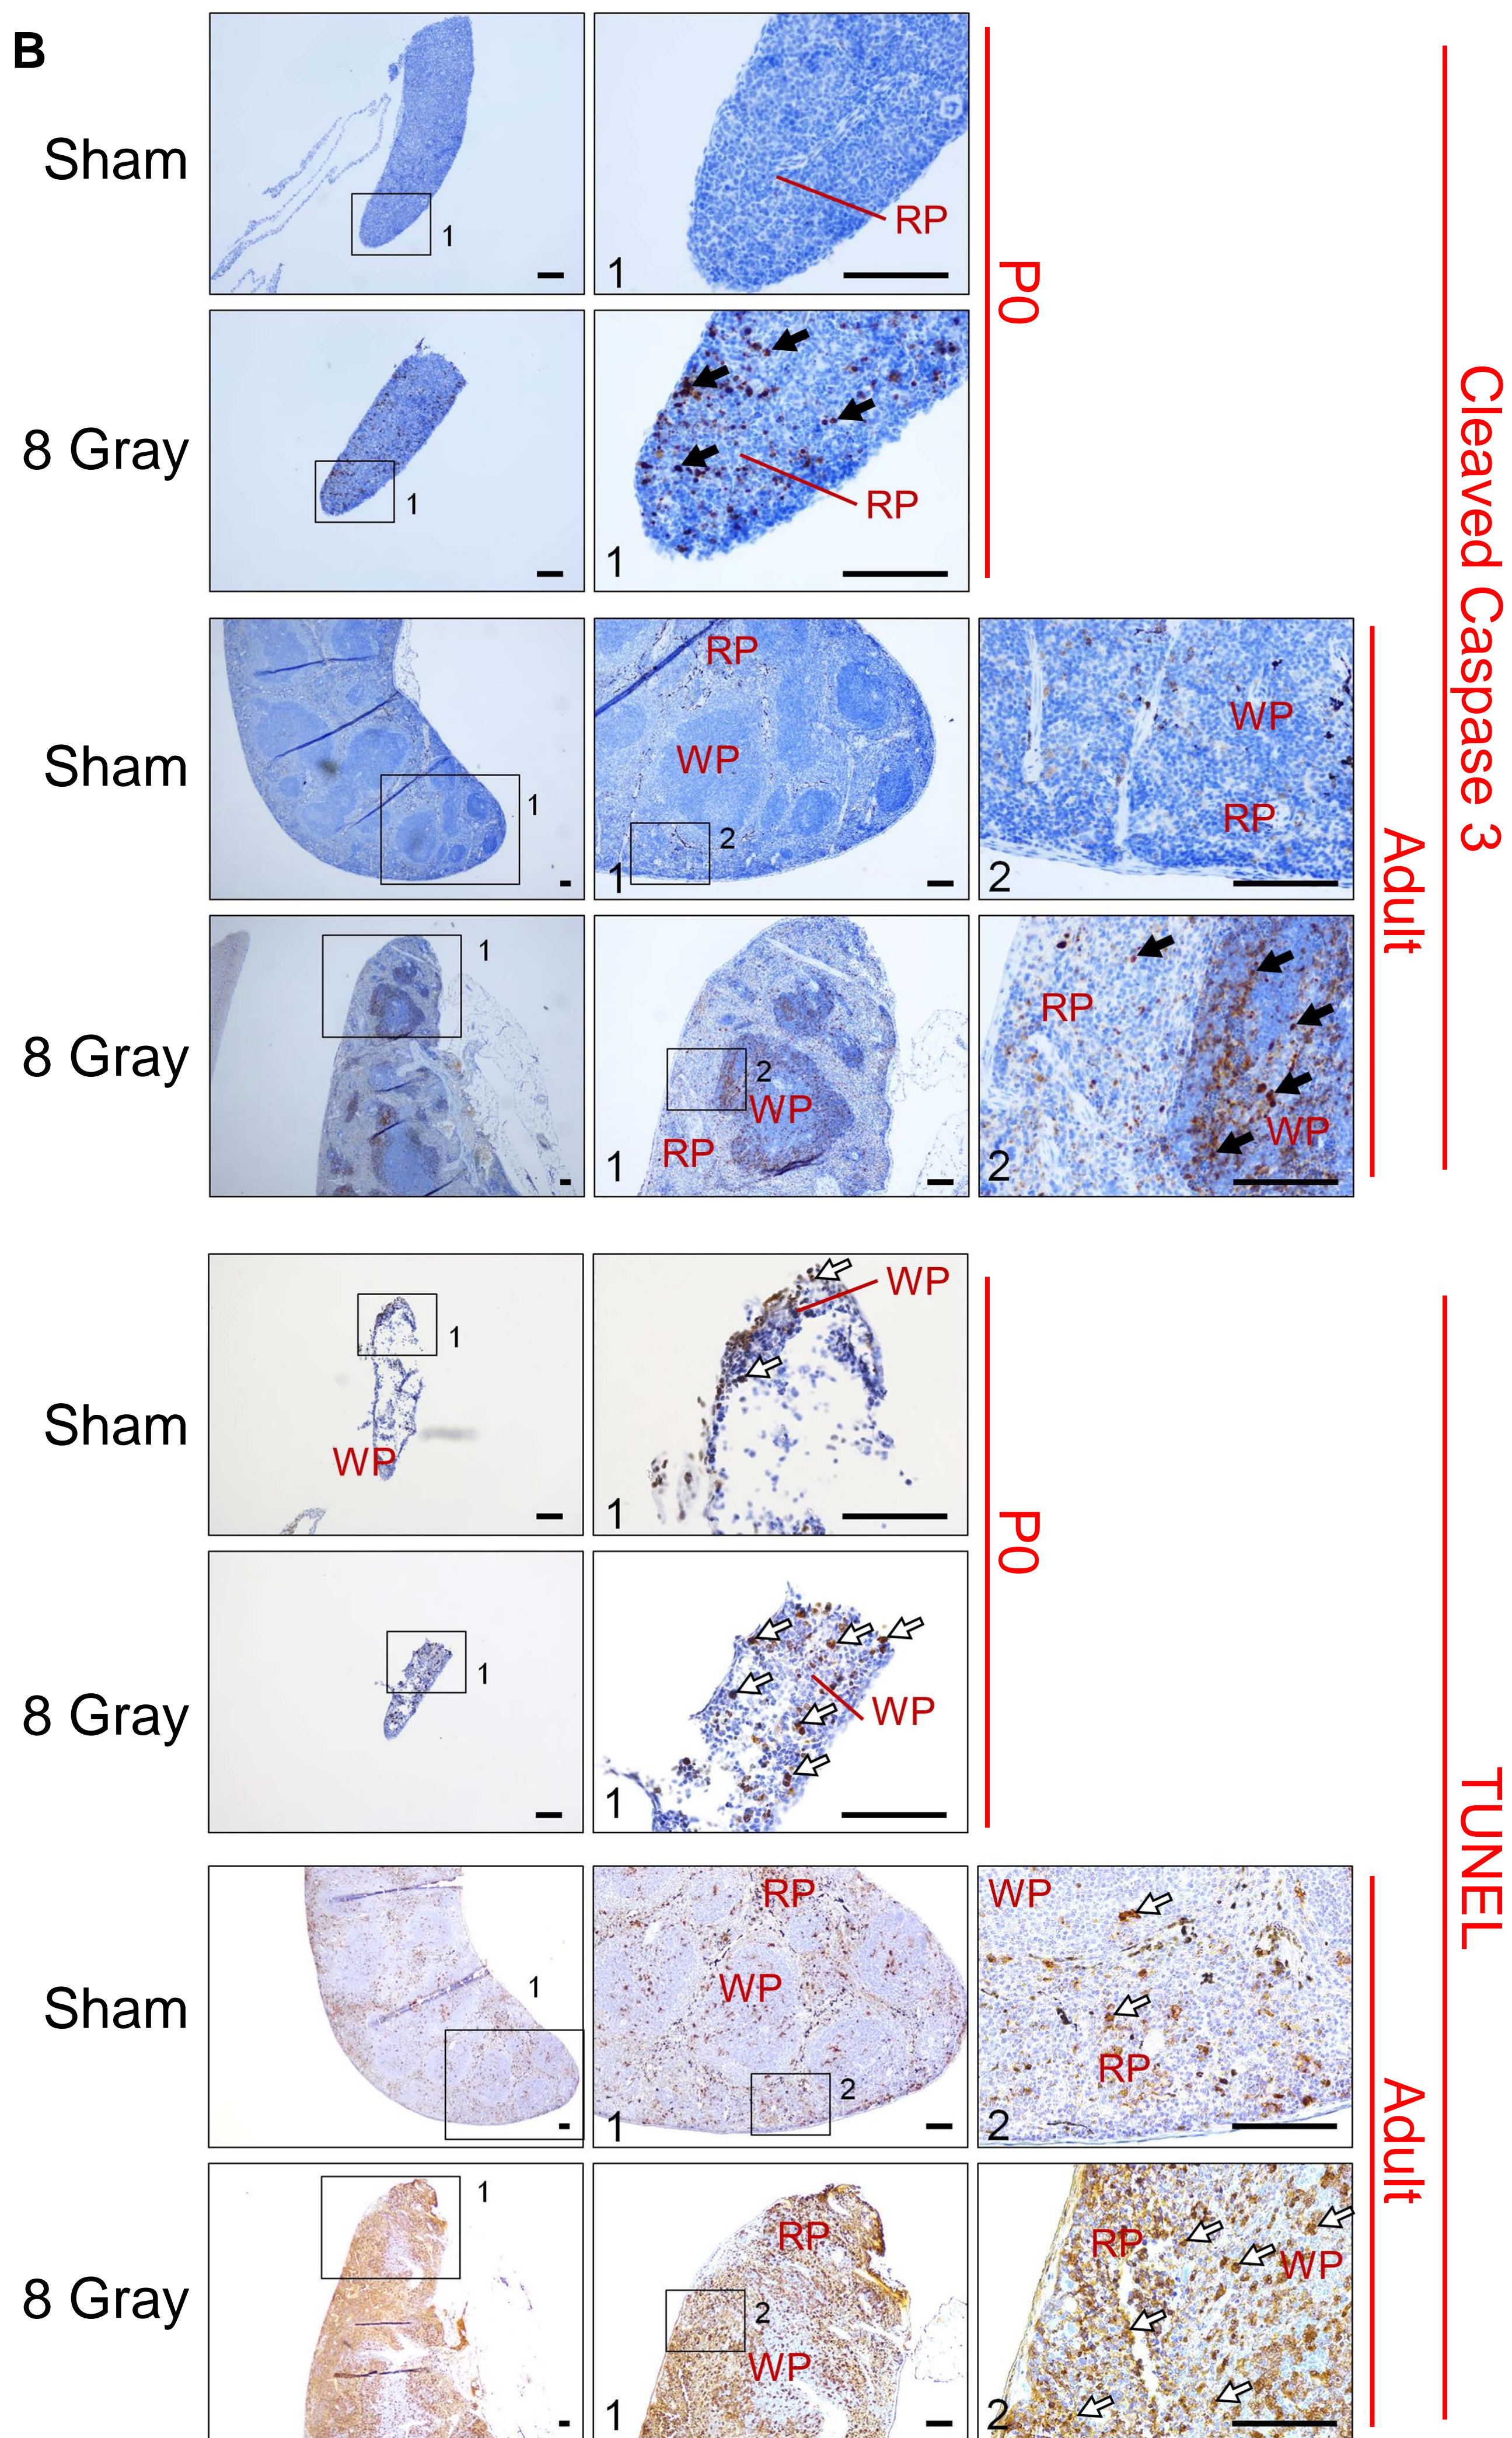







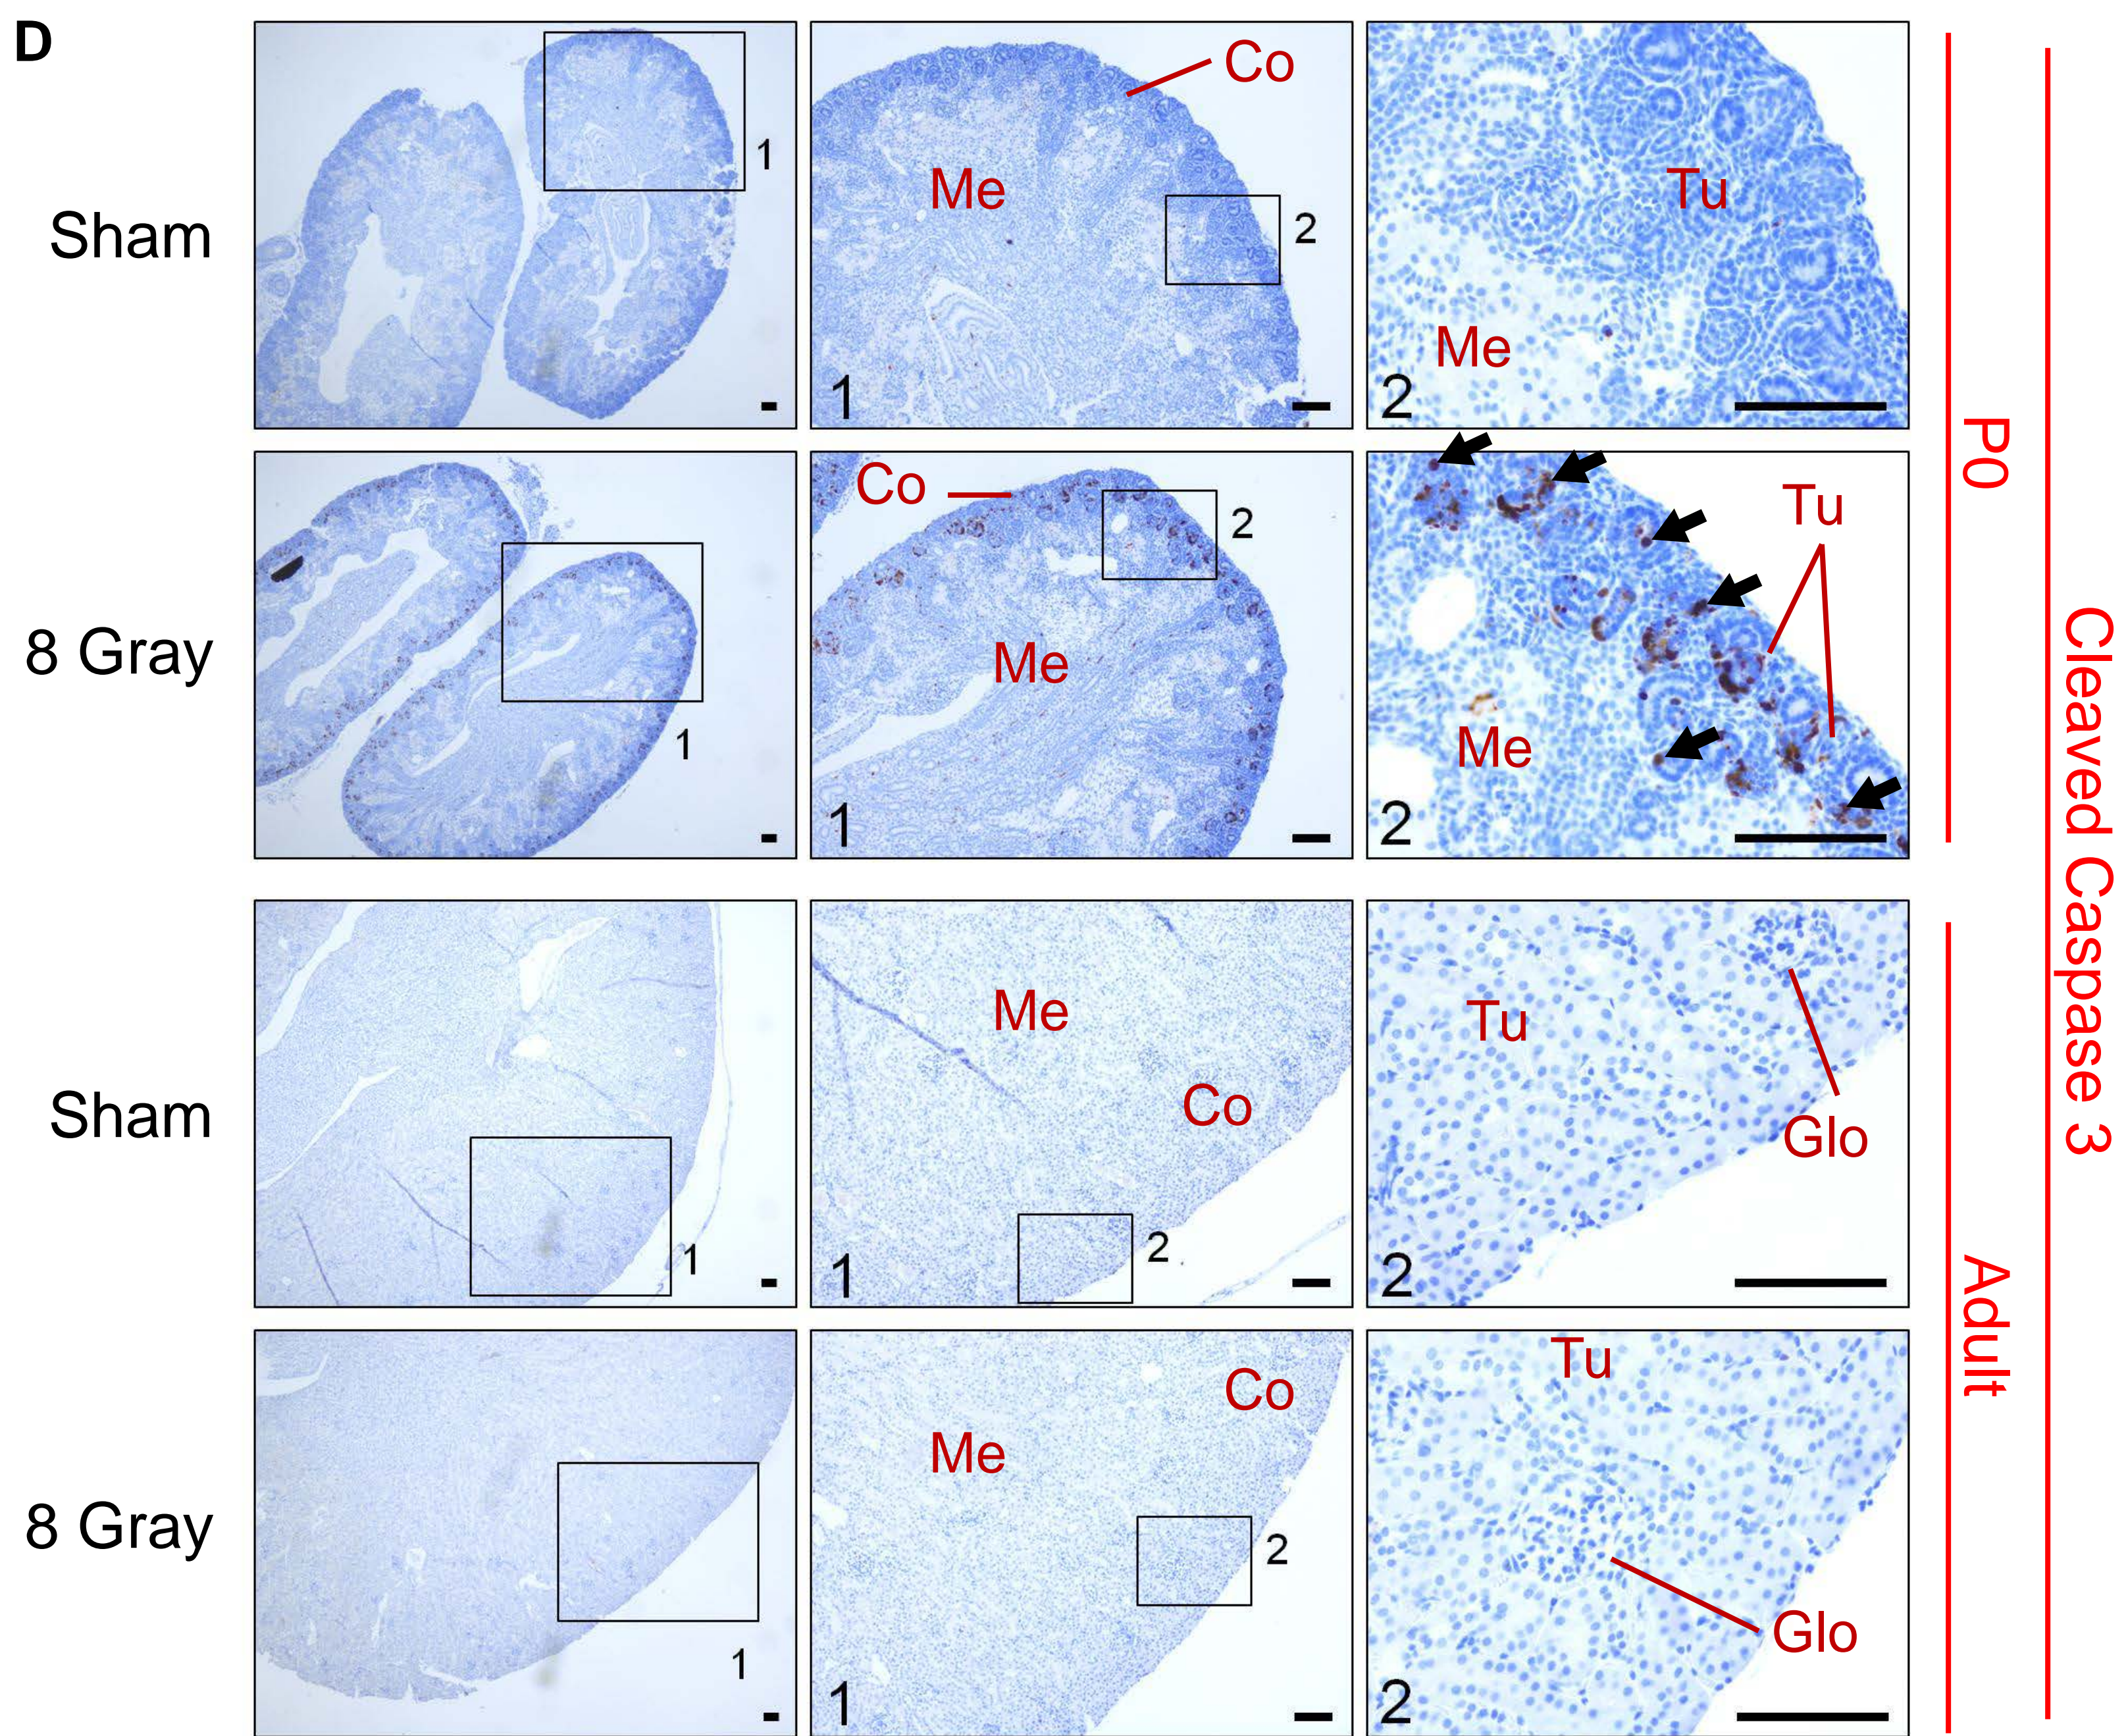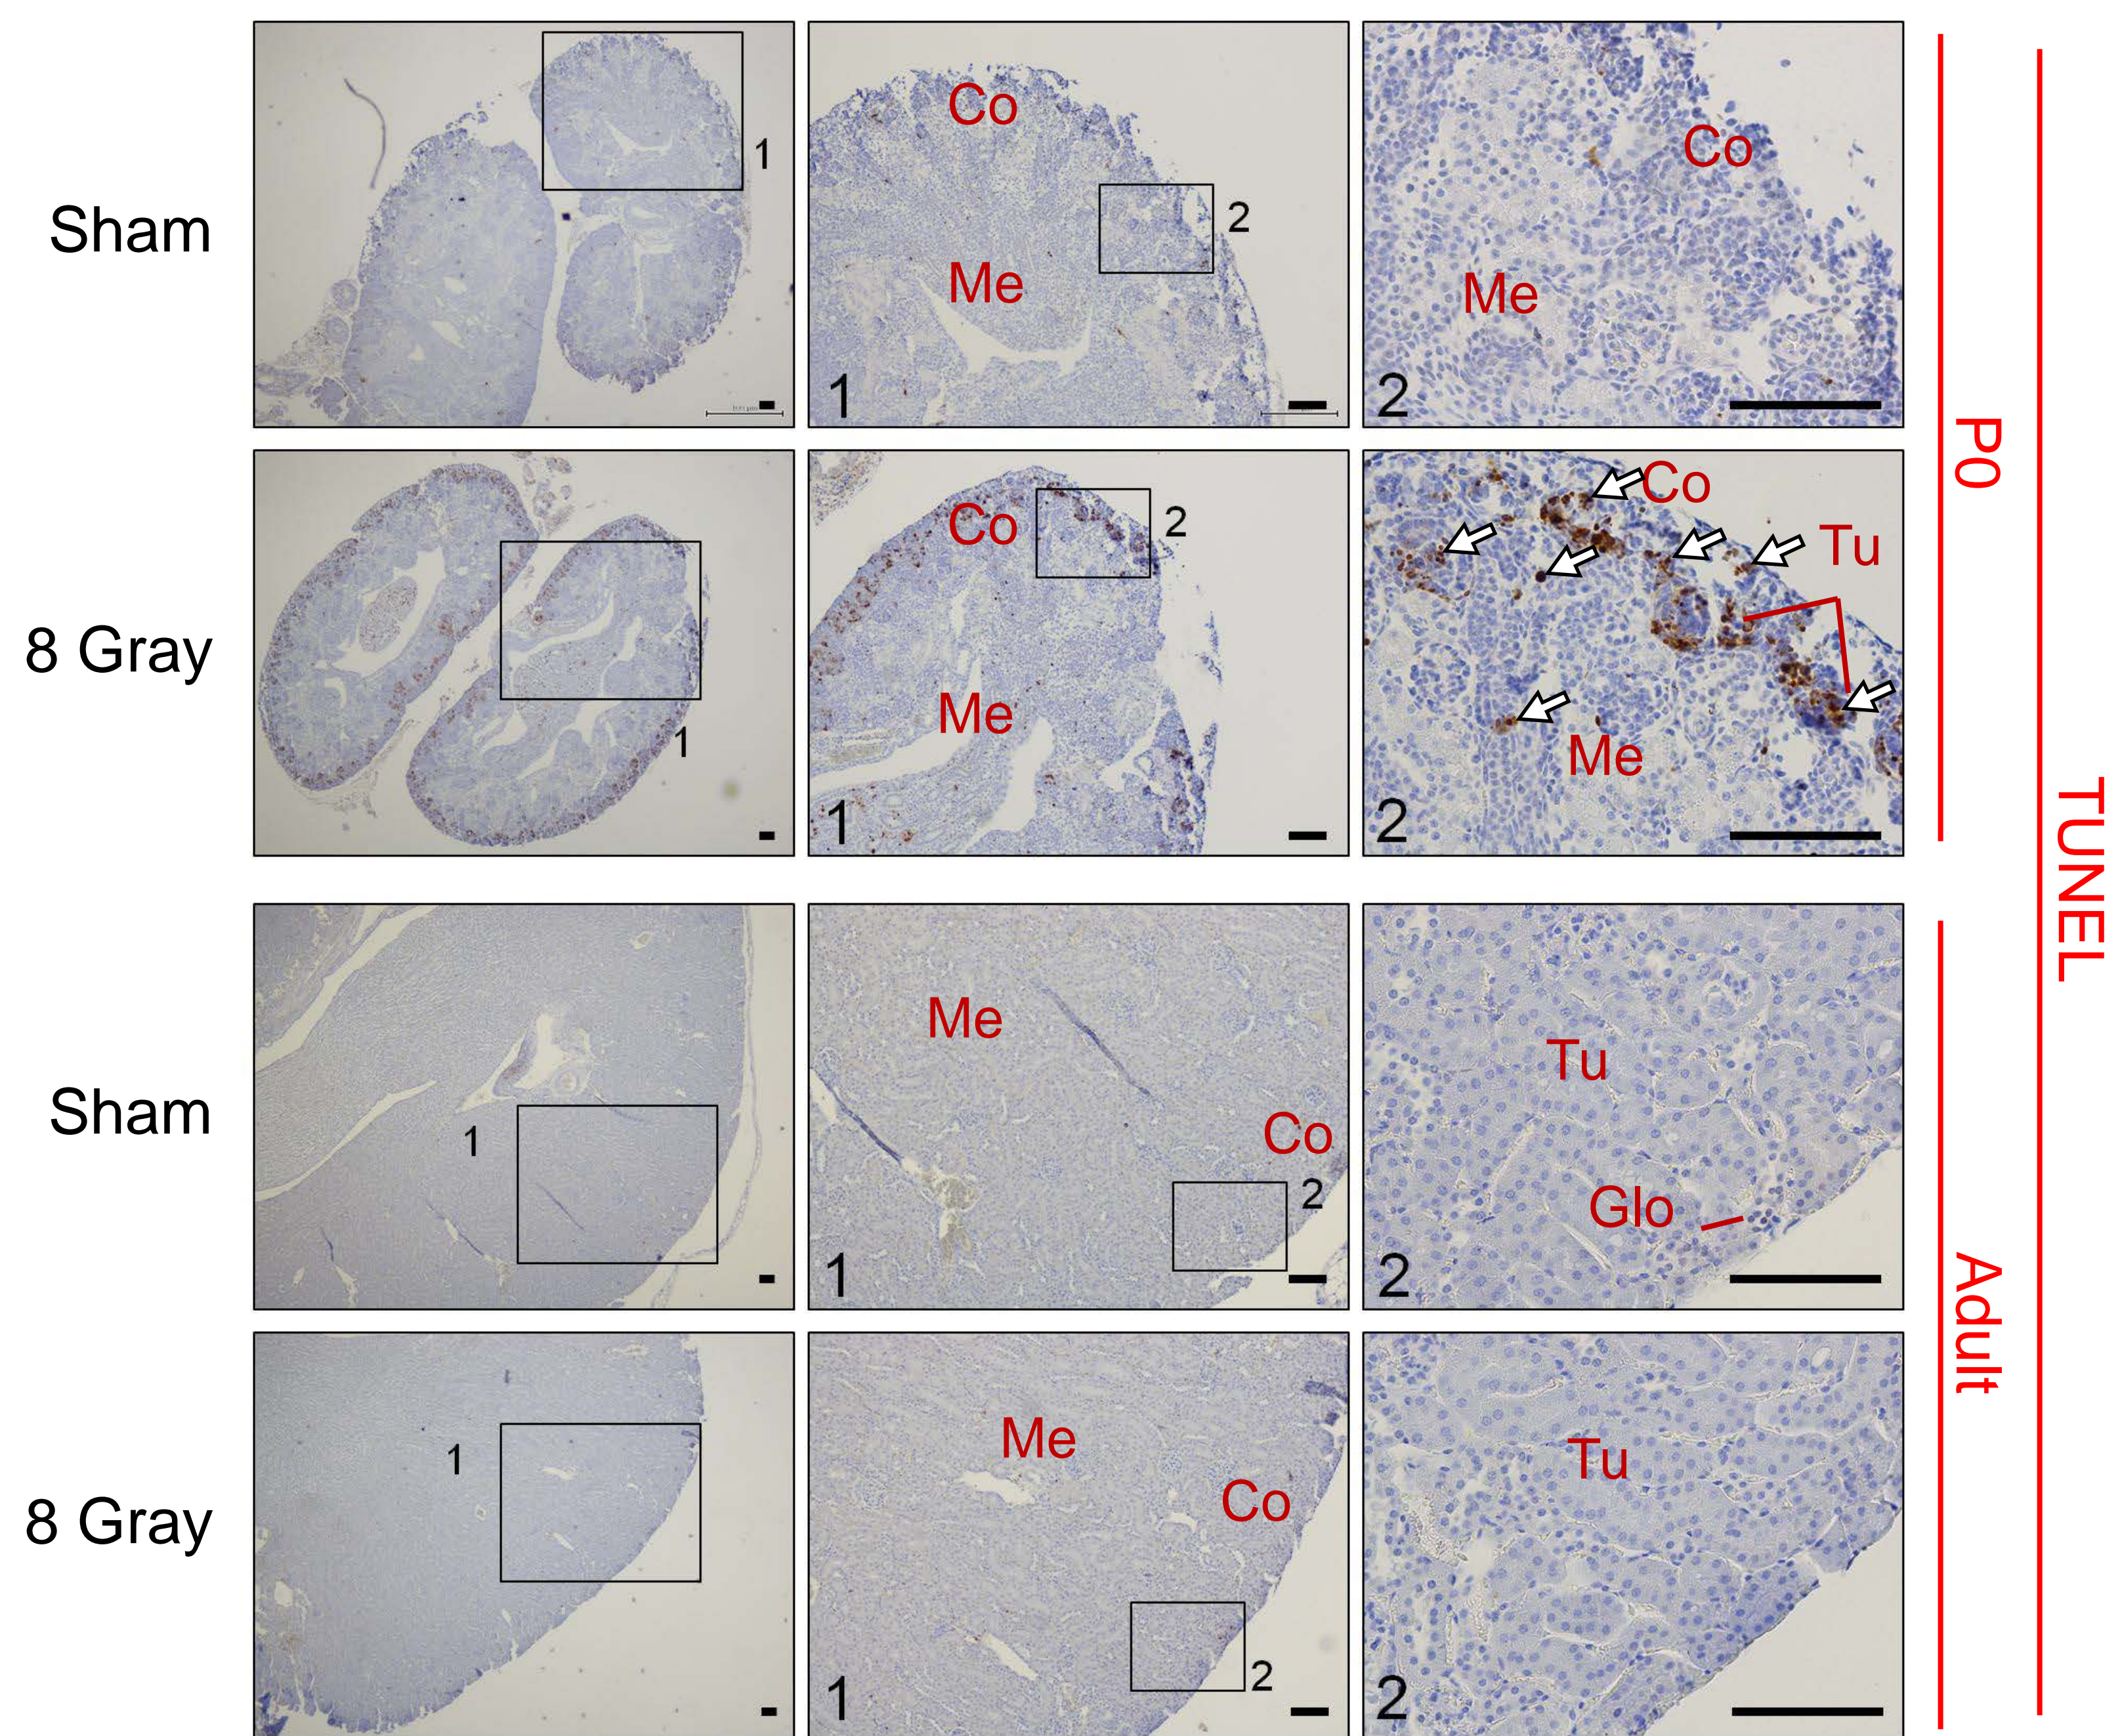



**E****Sham**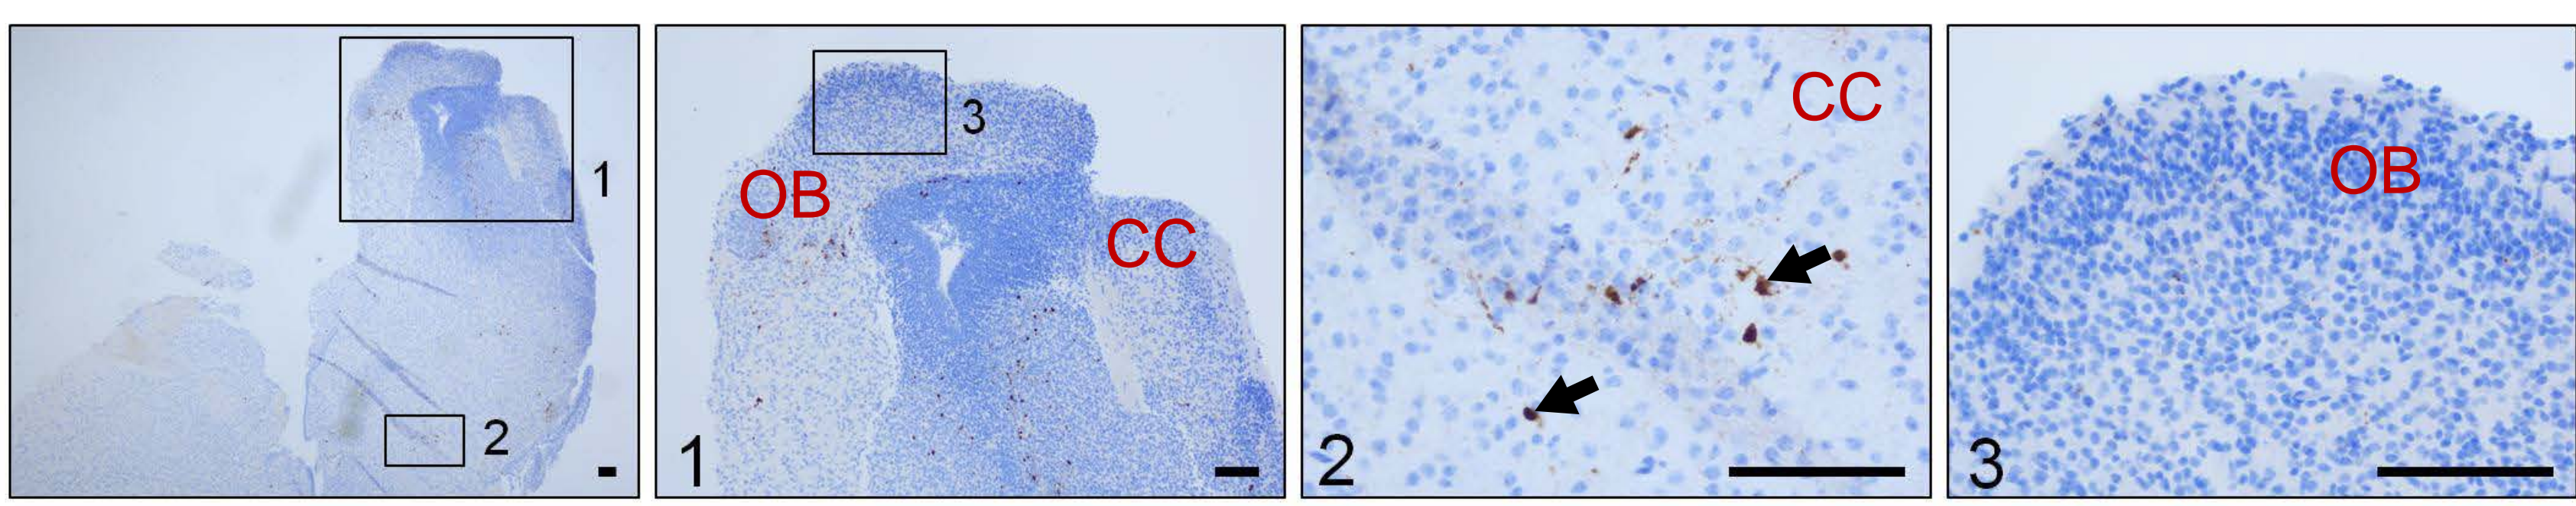**8 Gray**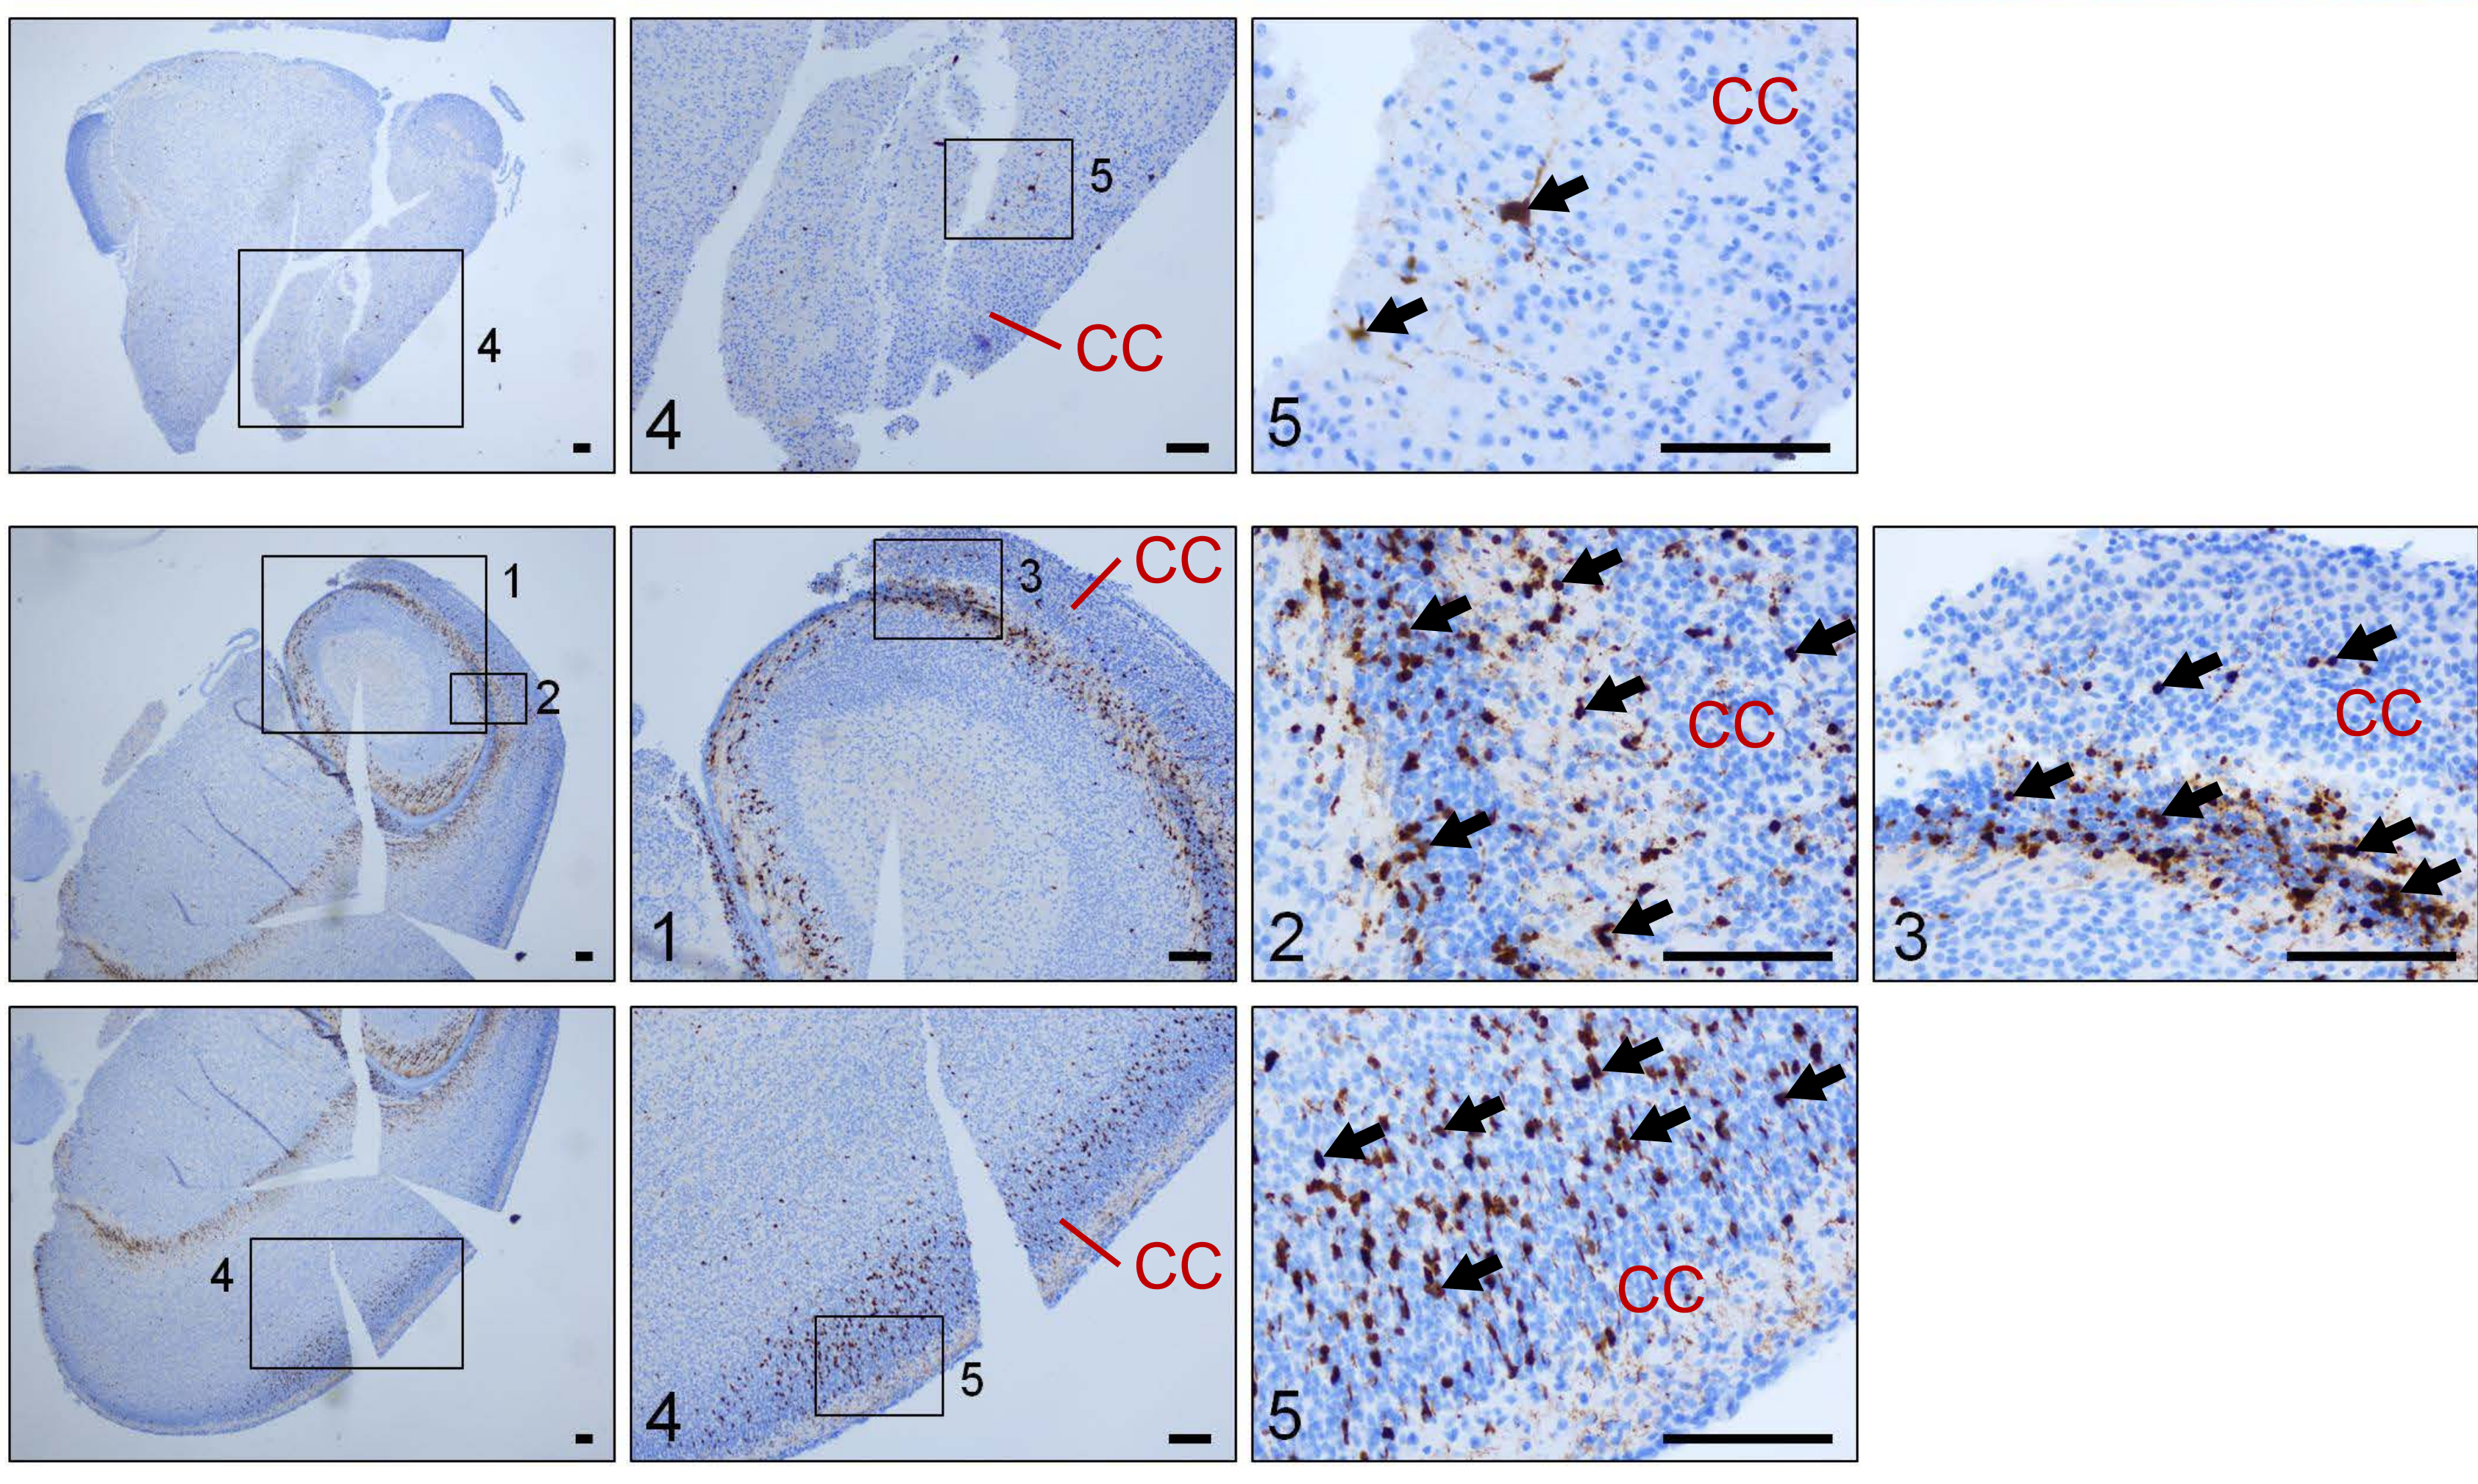**Sham**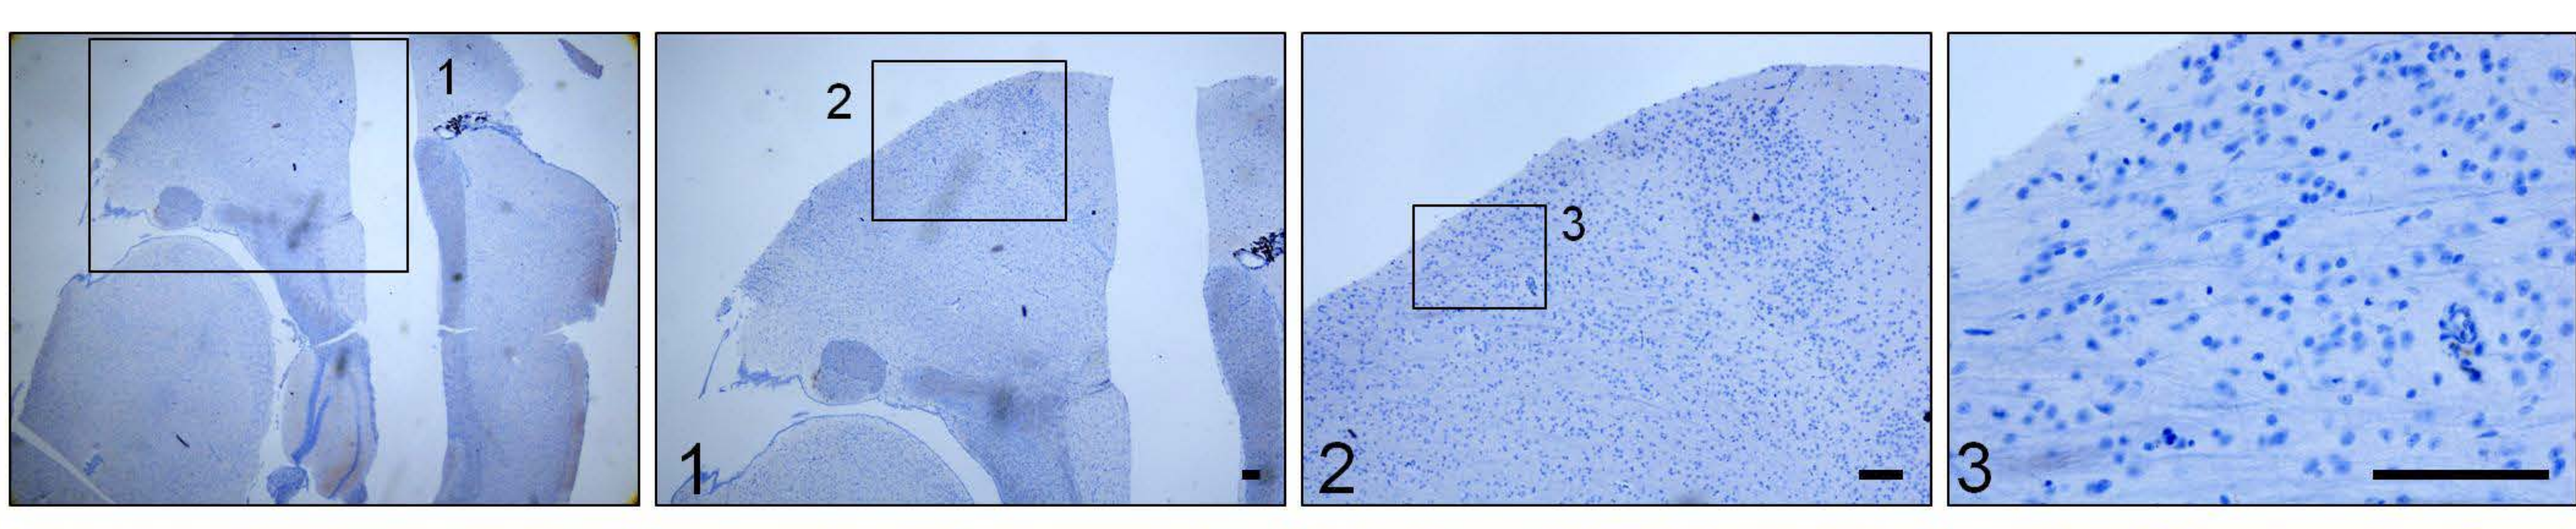**8 Gray**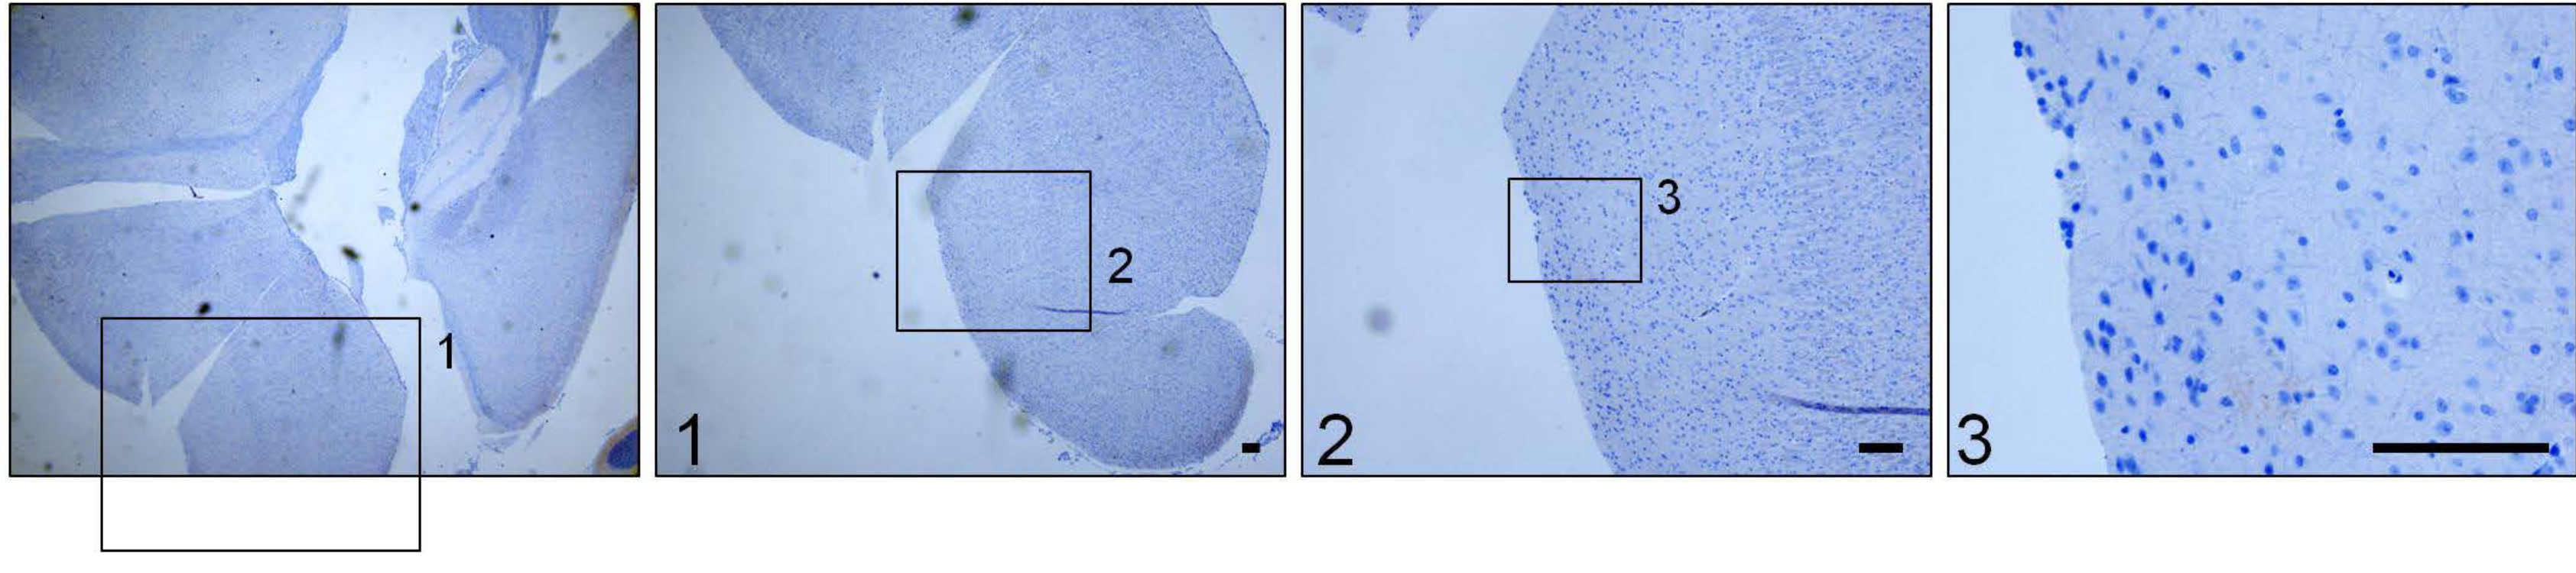**P0****Cleaved Caspase 3****Adult**



E

Sham

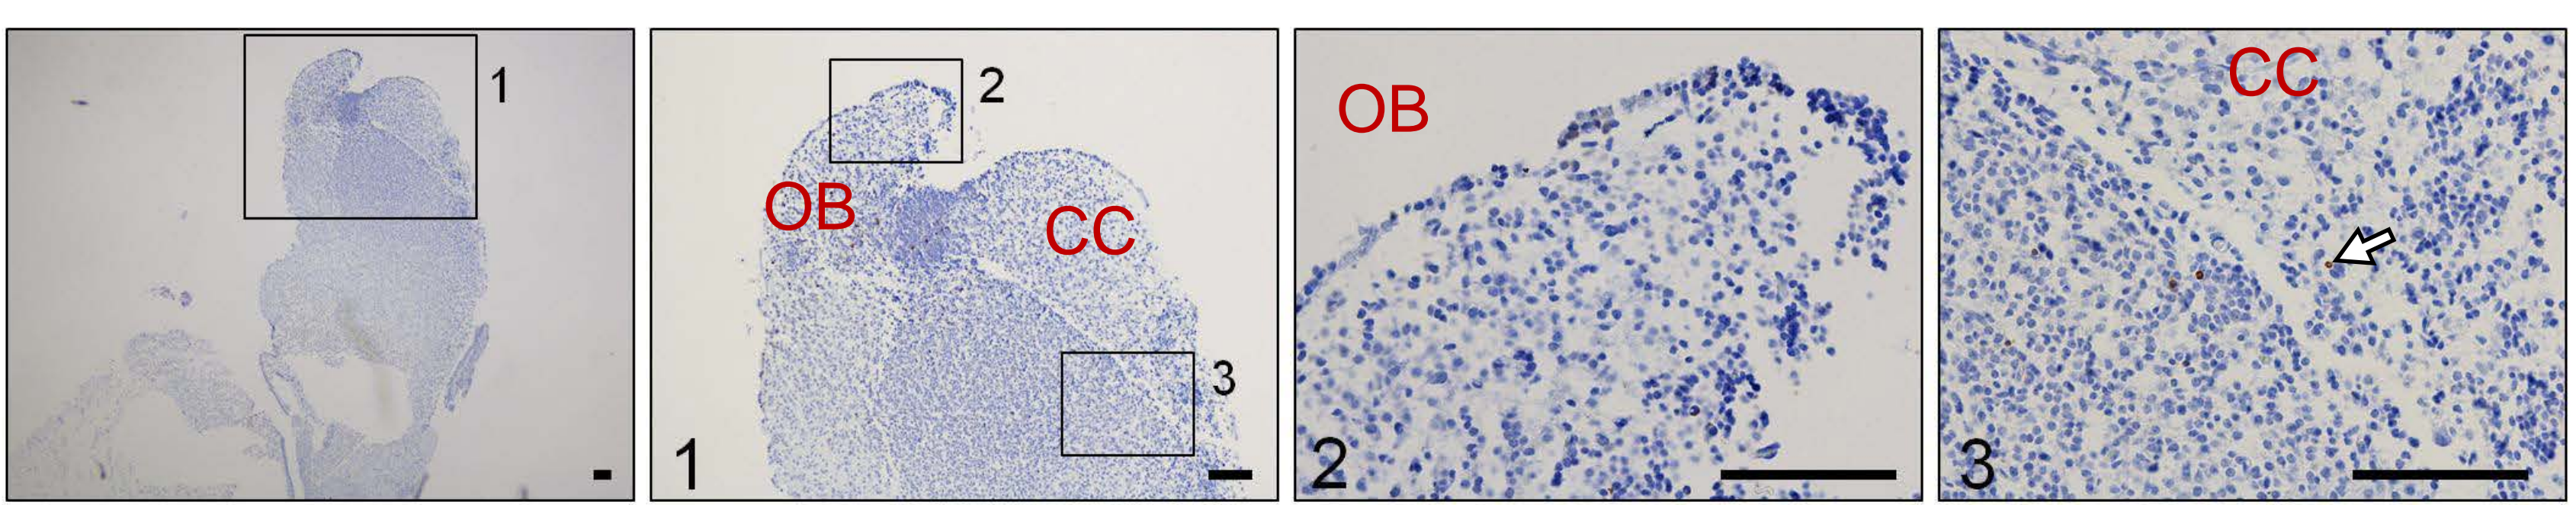

8 Gray

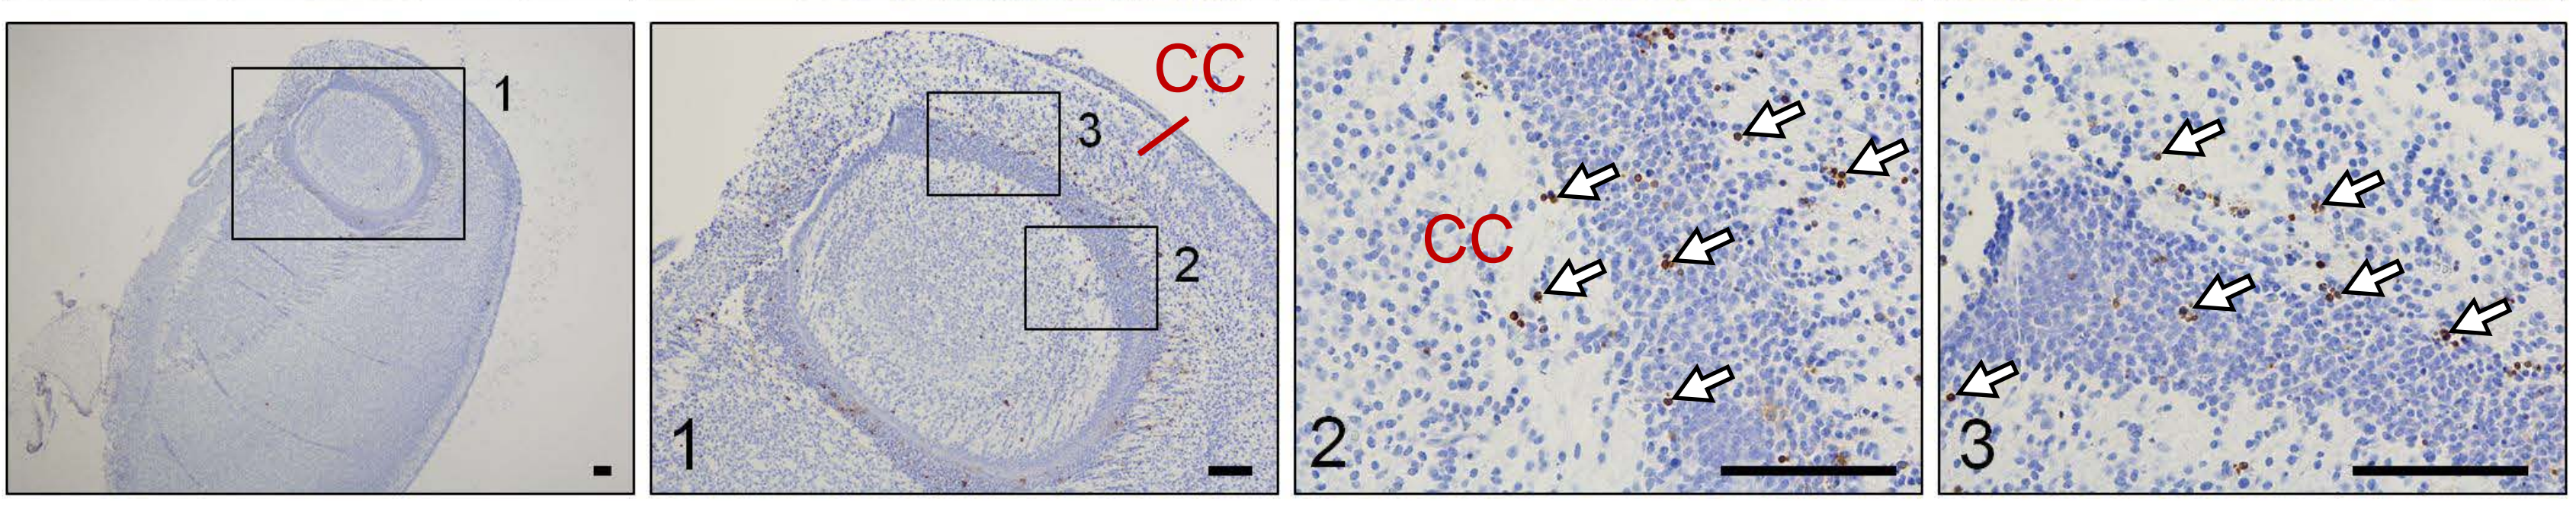

P0

TUNEL

Sham

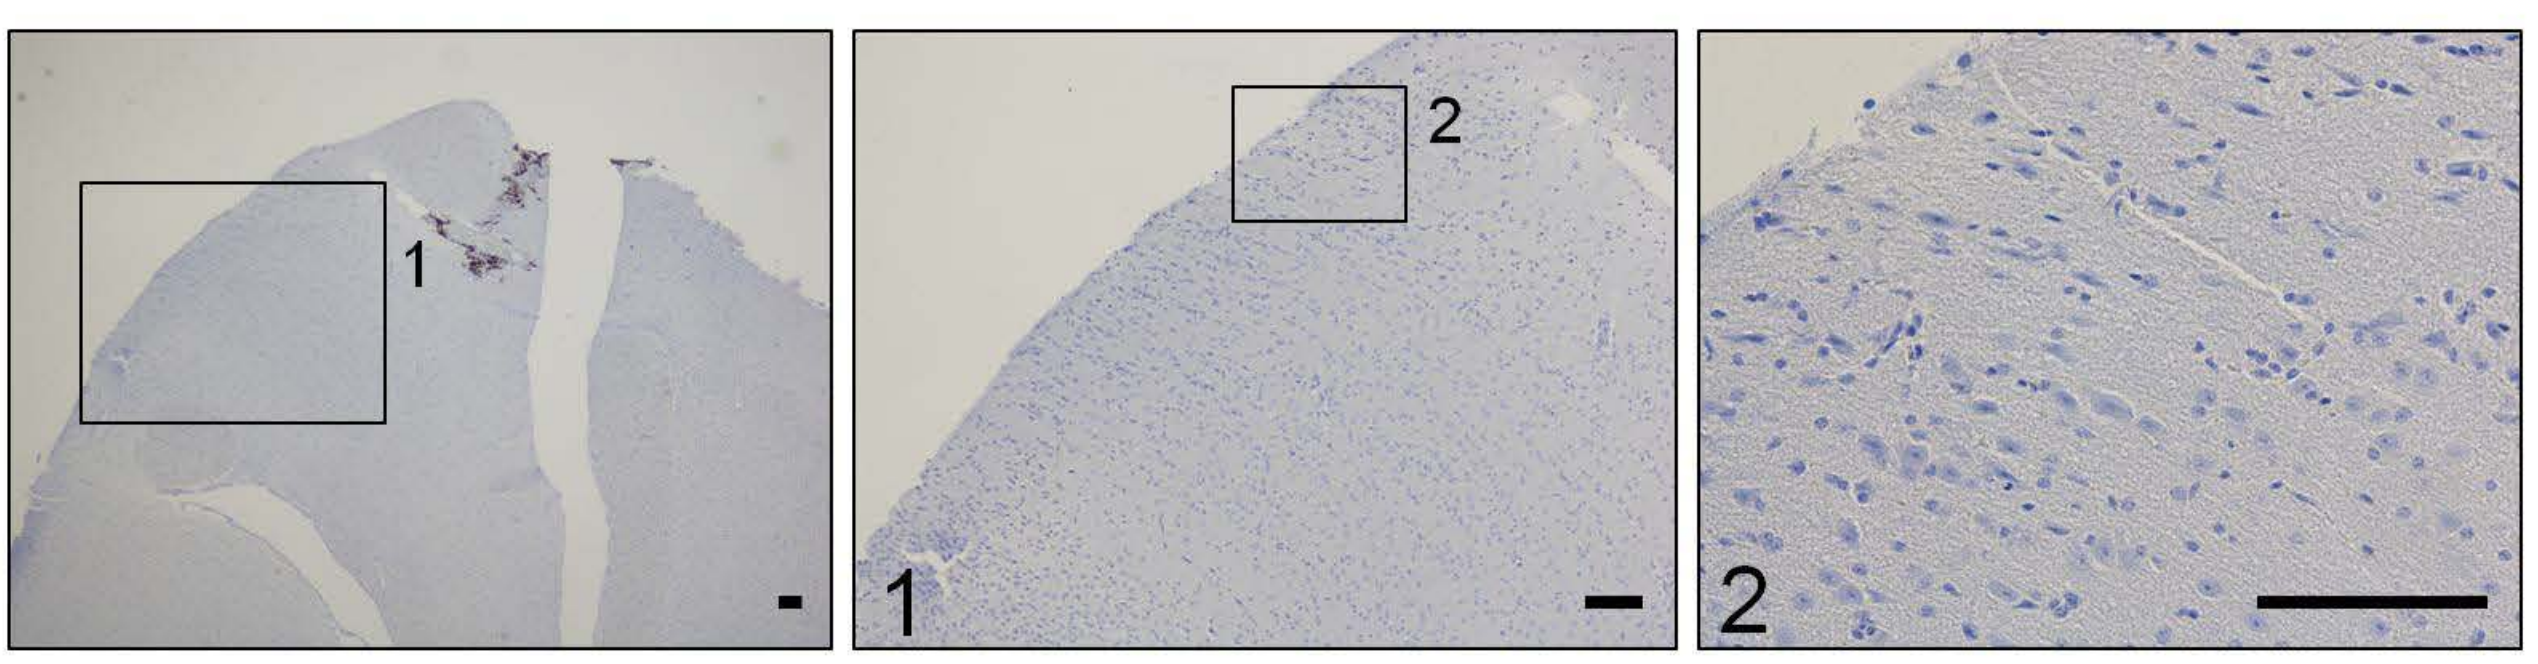

Adult

8 Gray

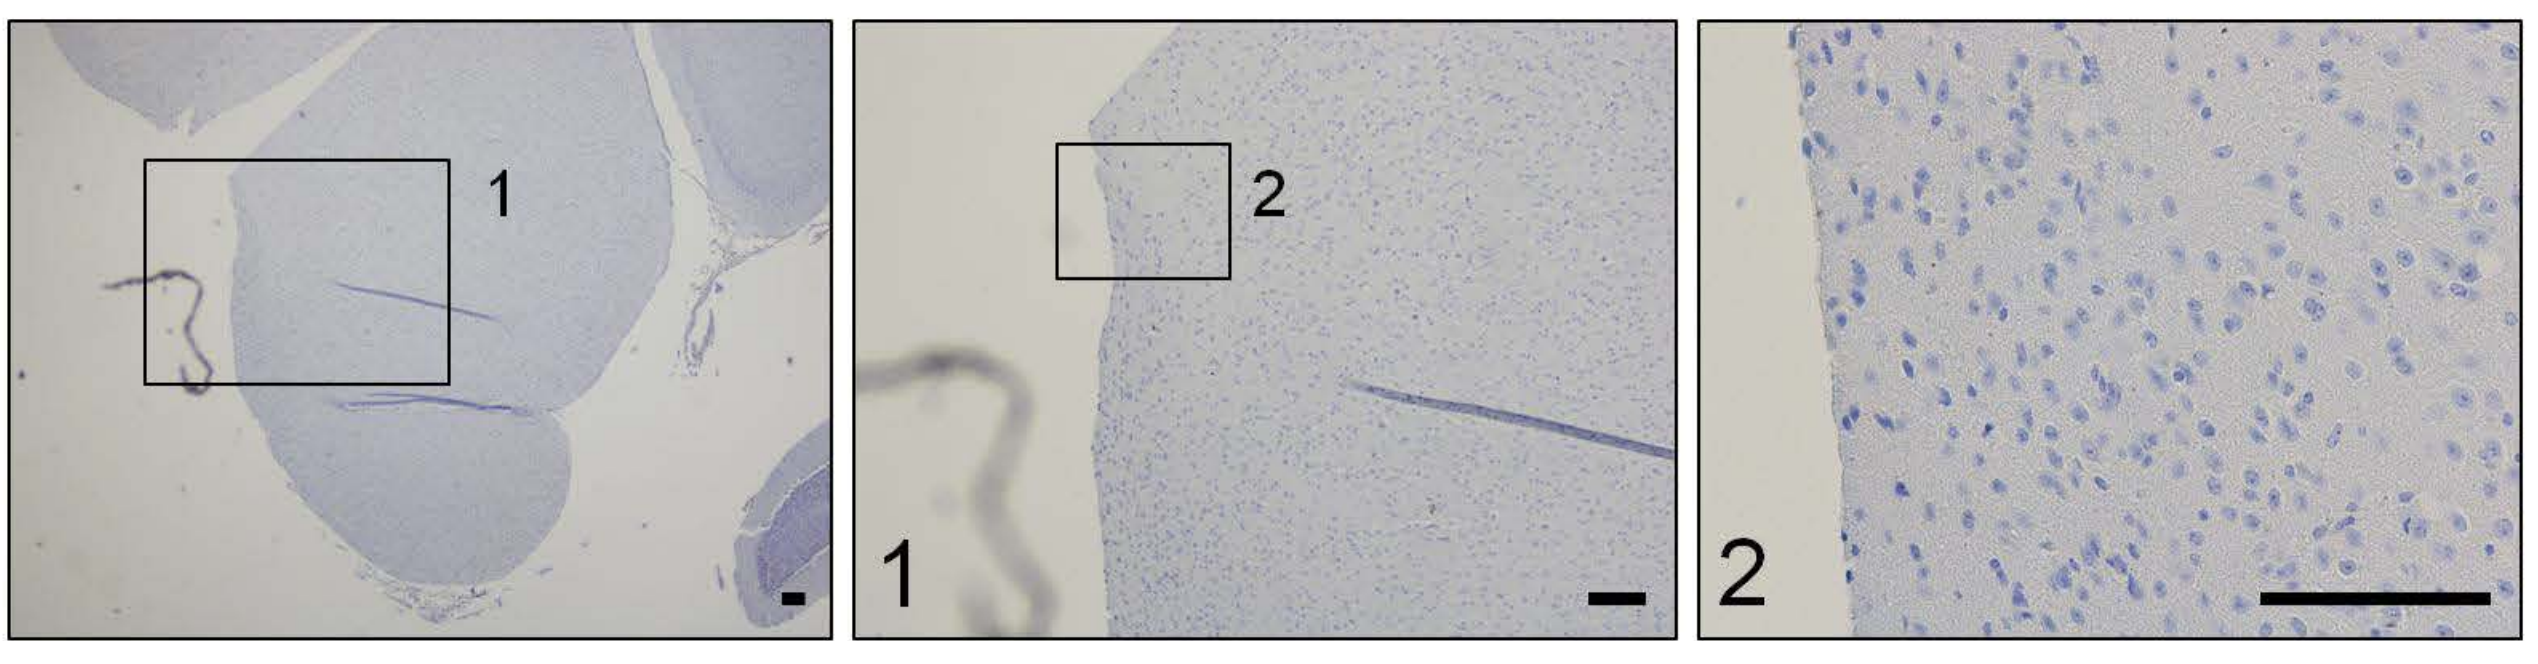







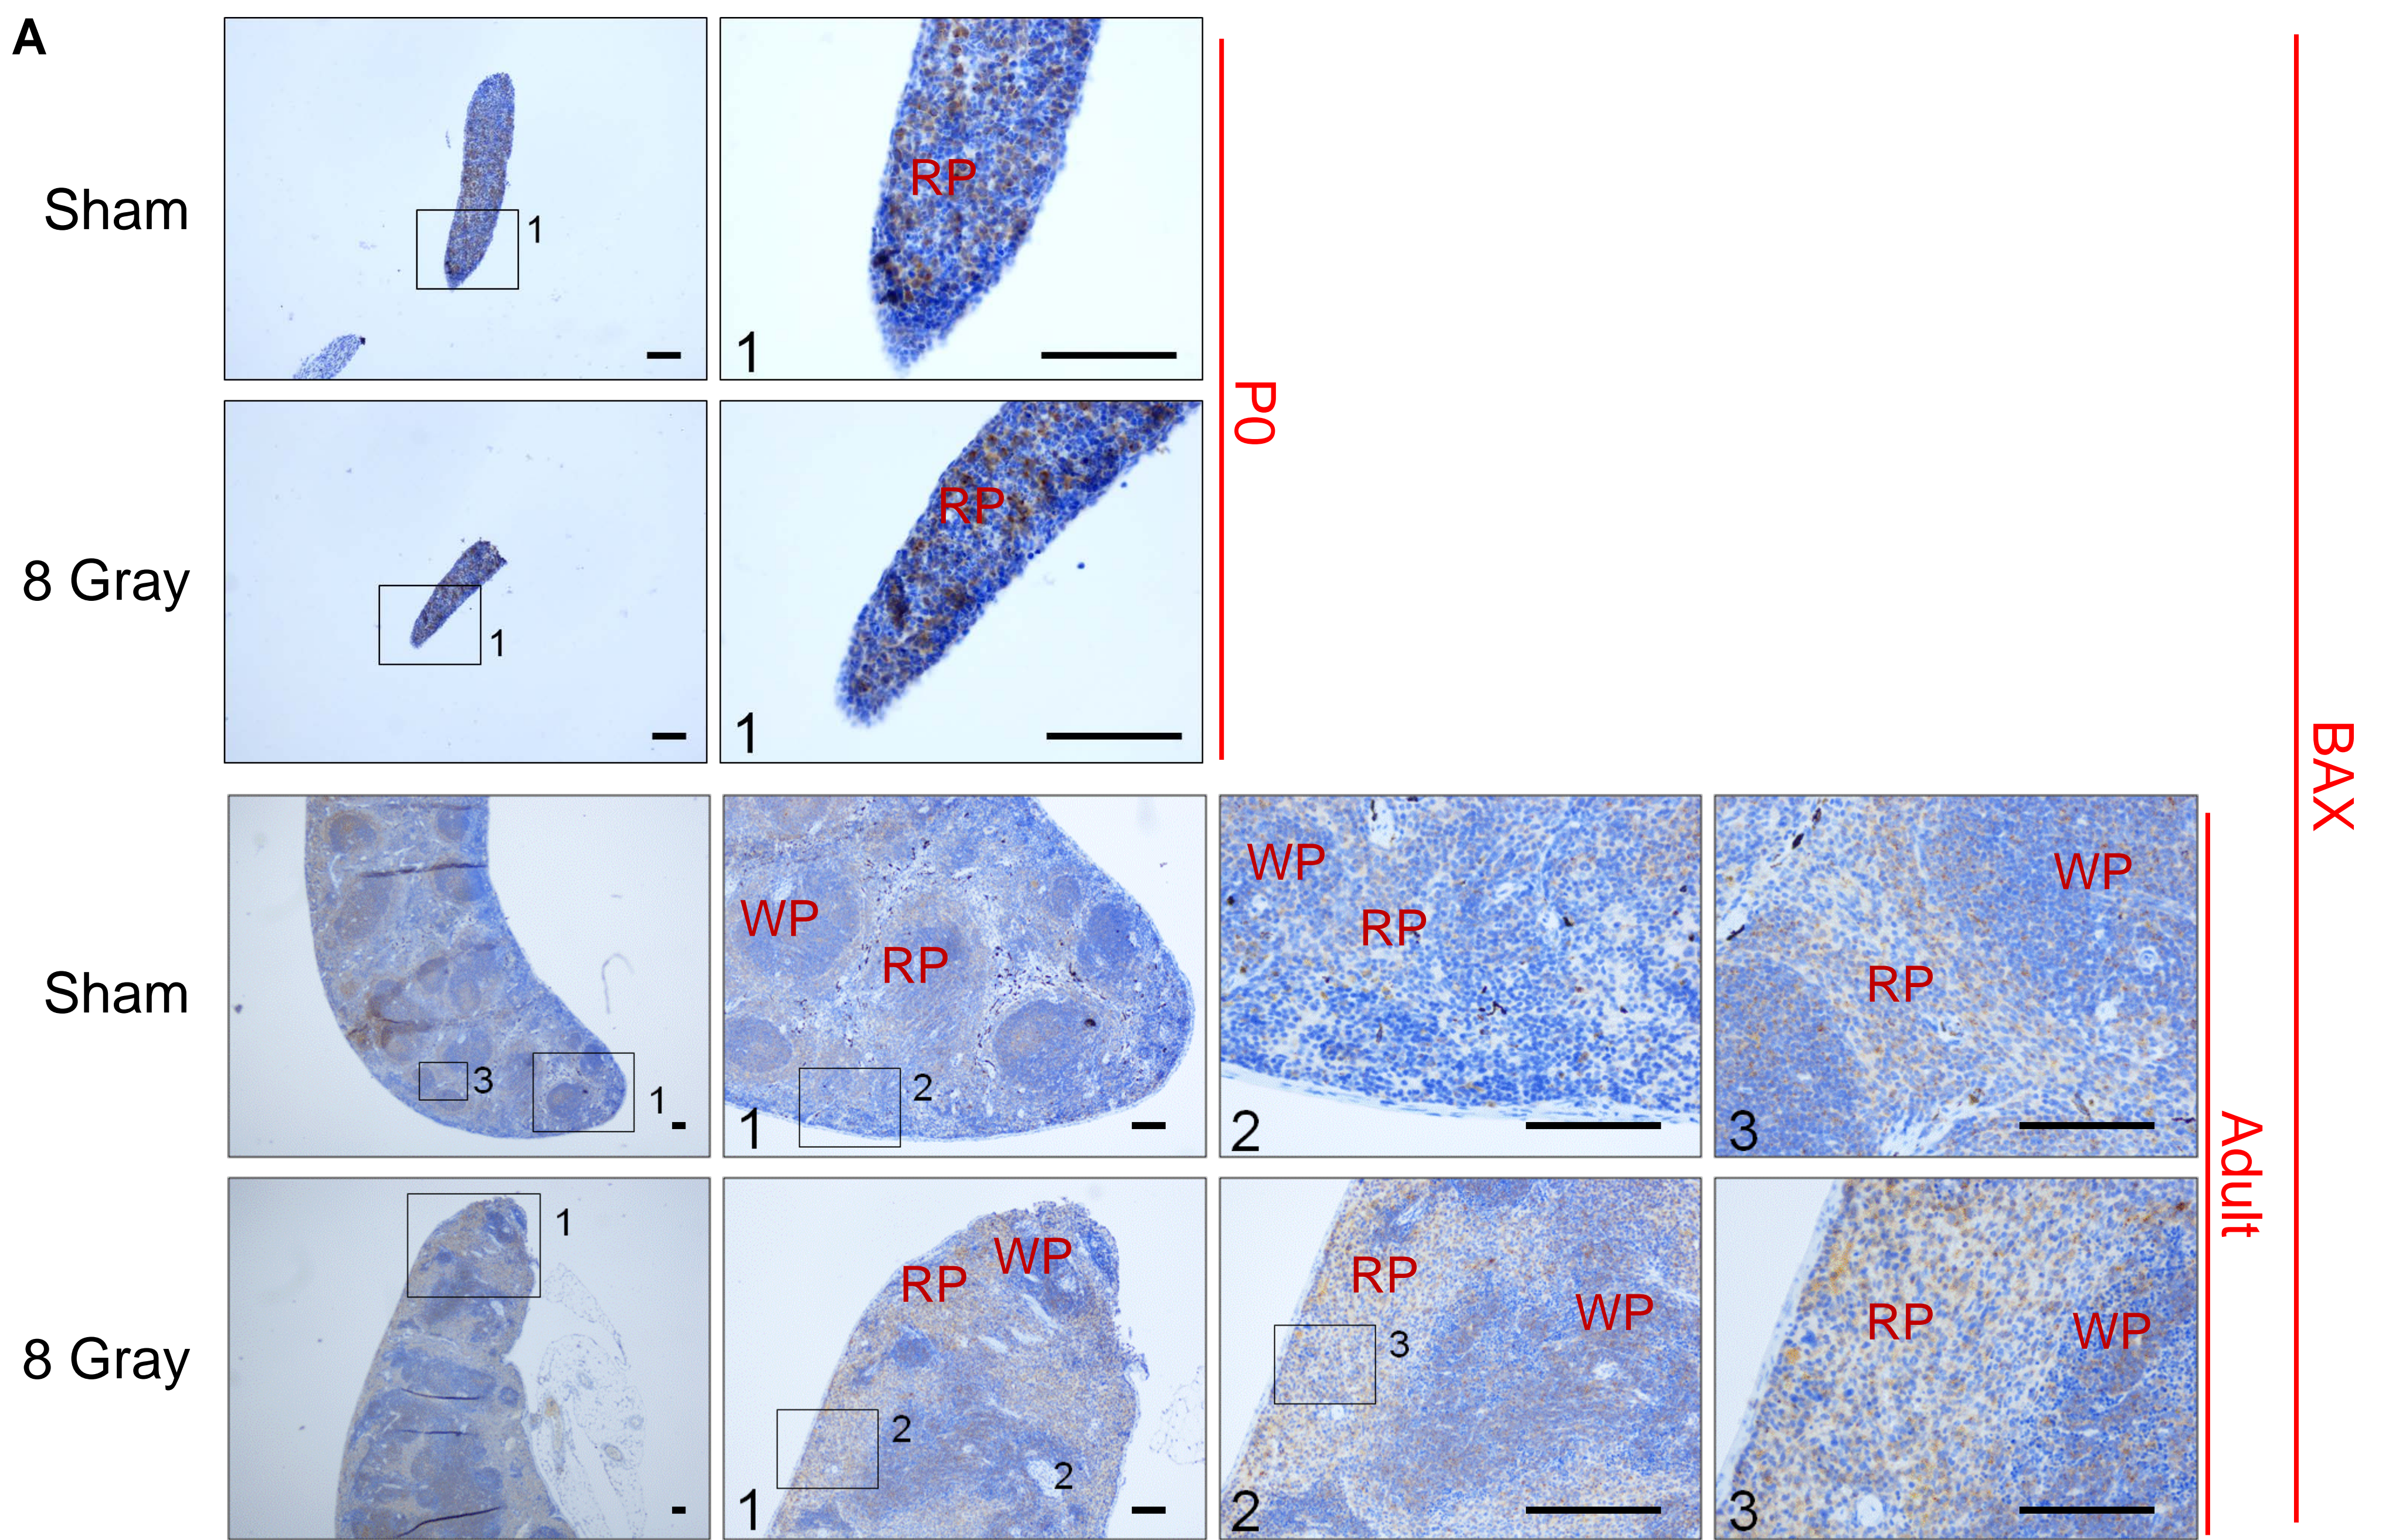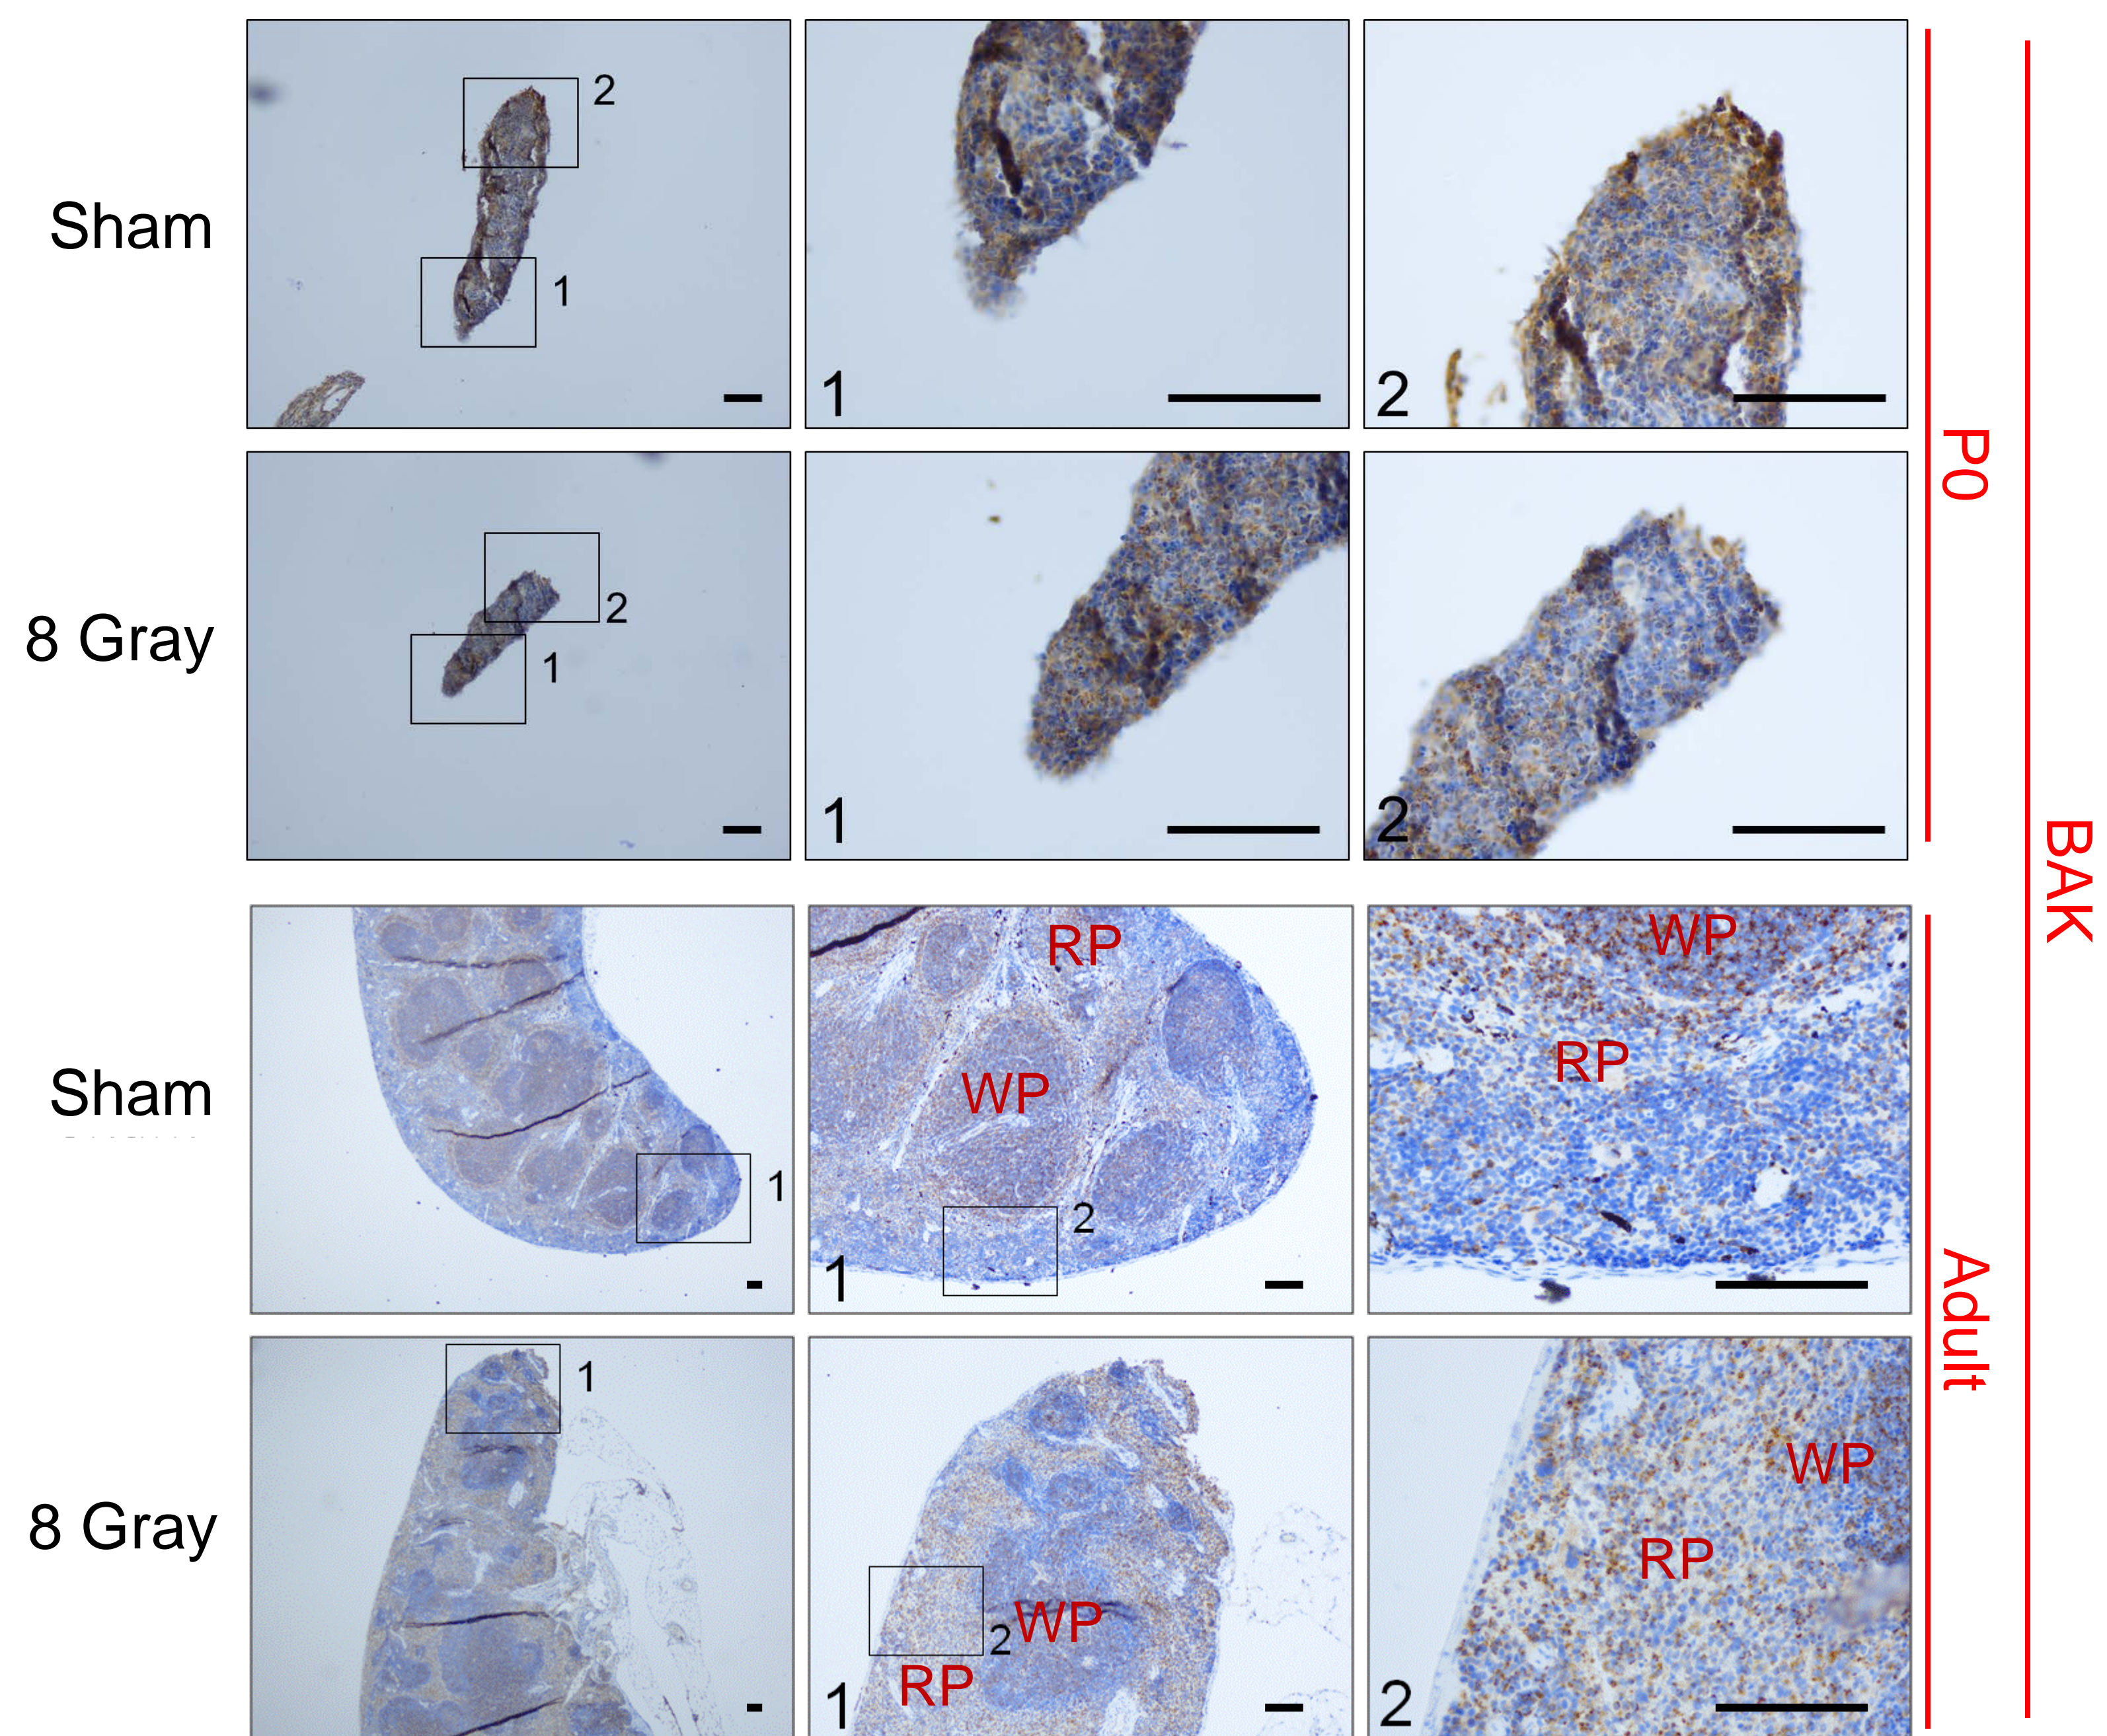



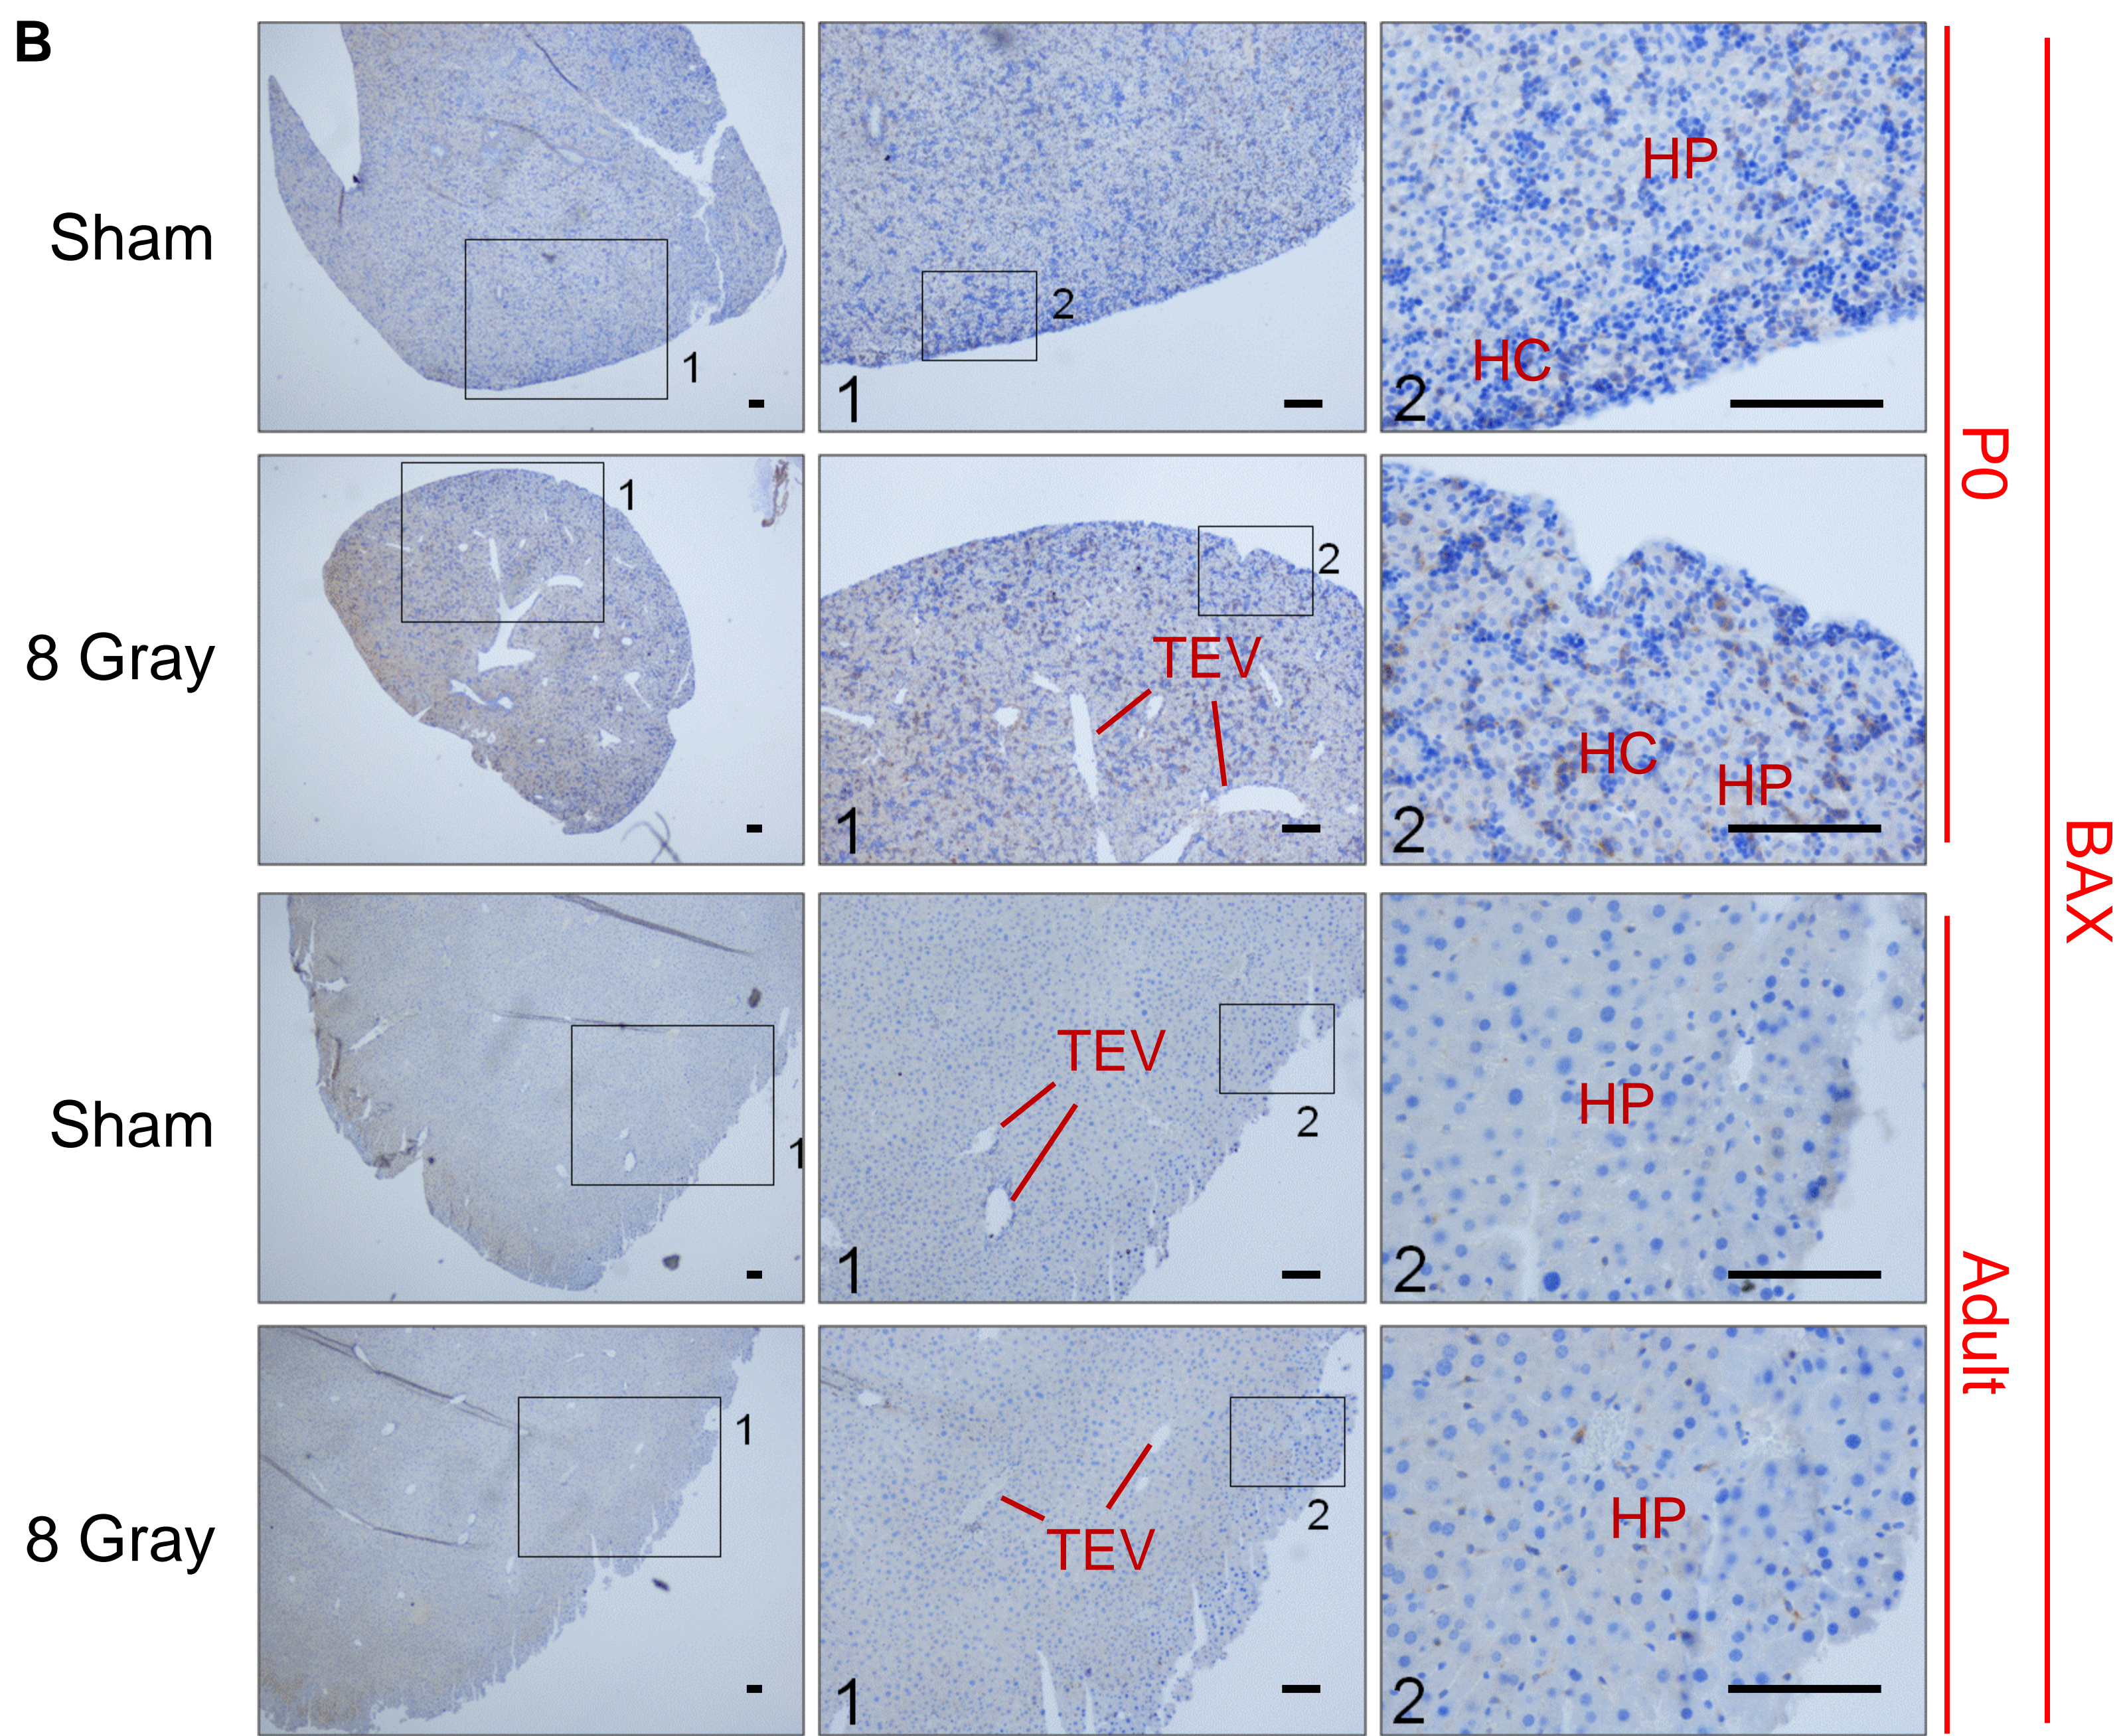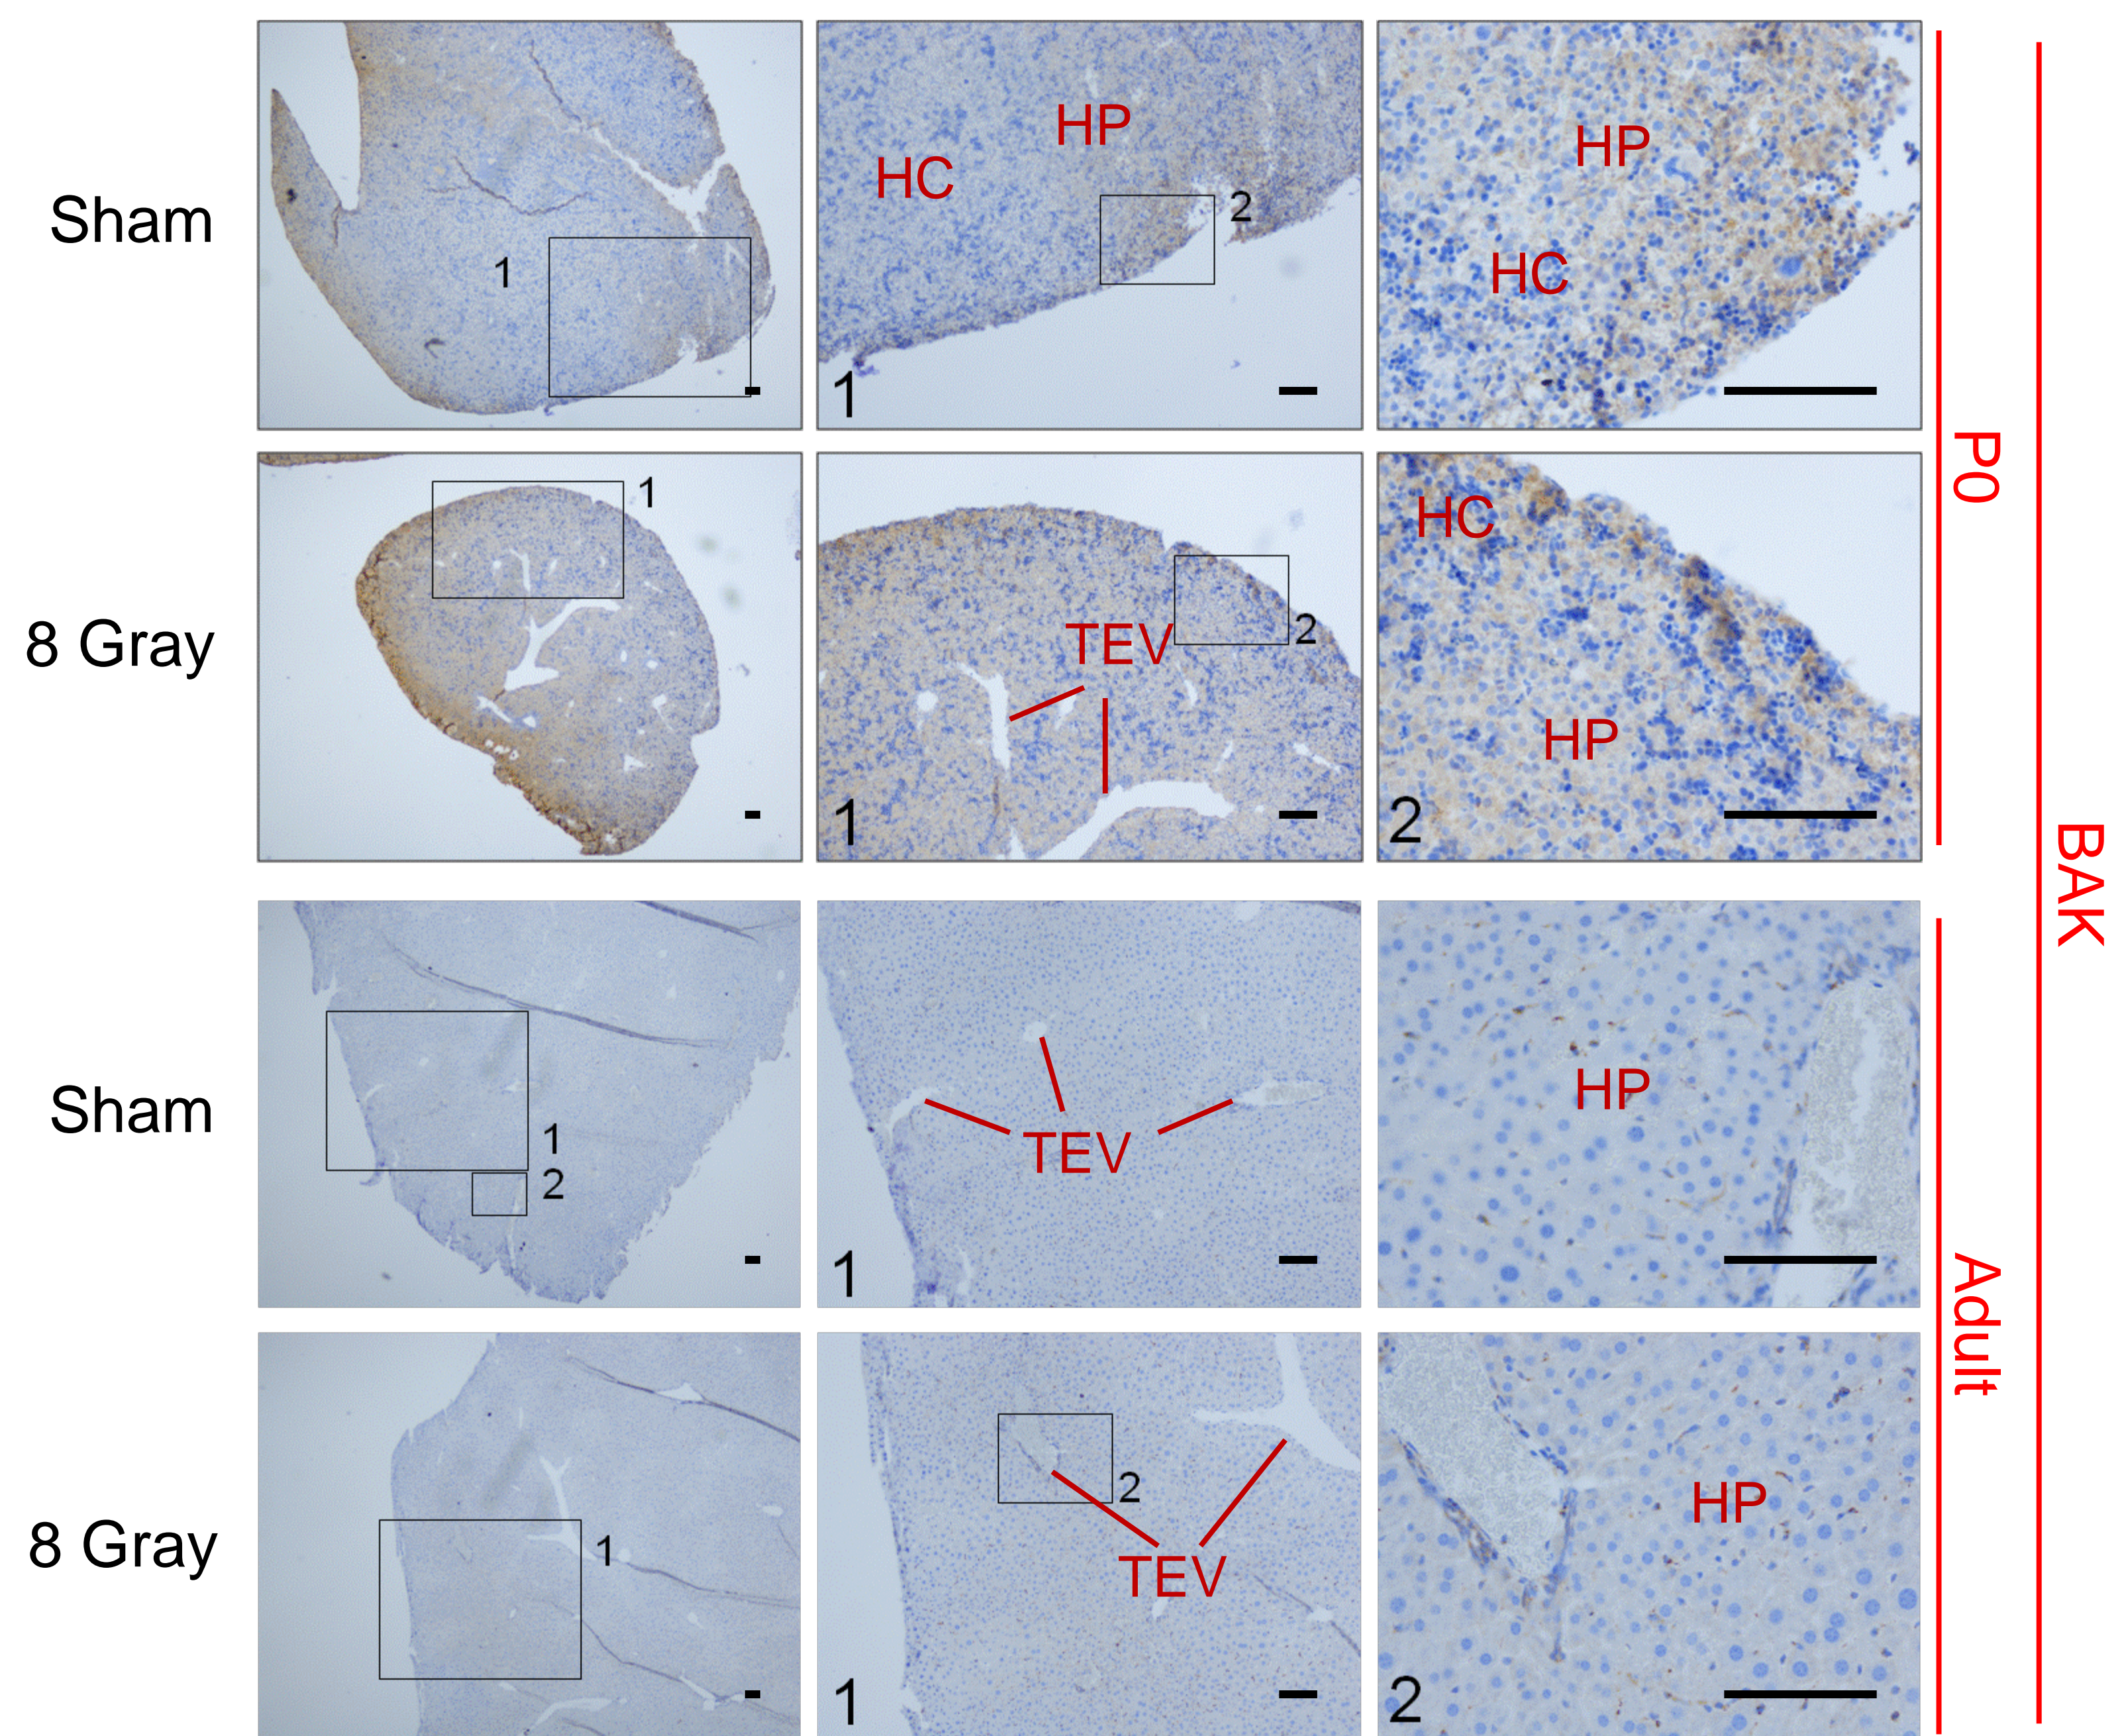



**C**

Sham

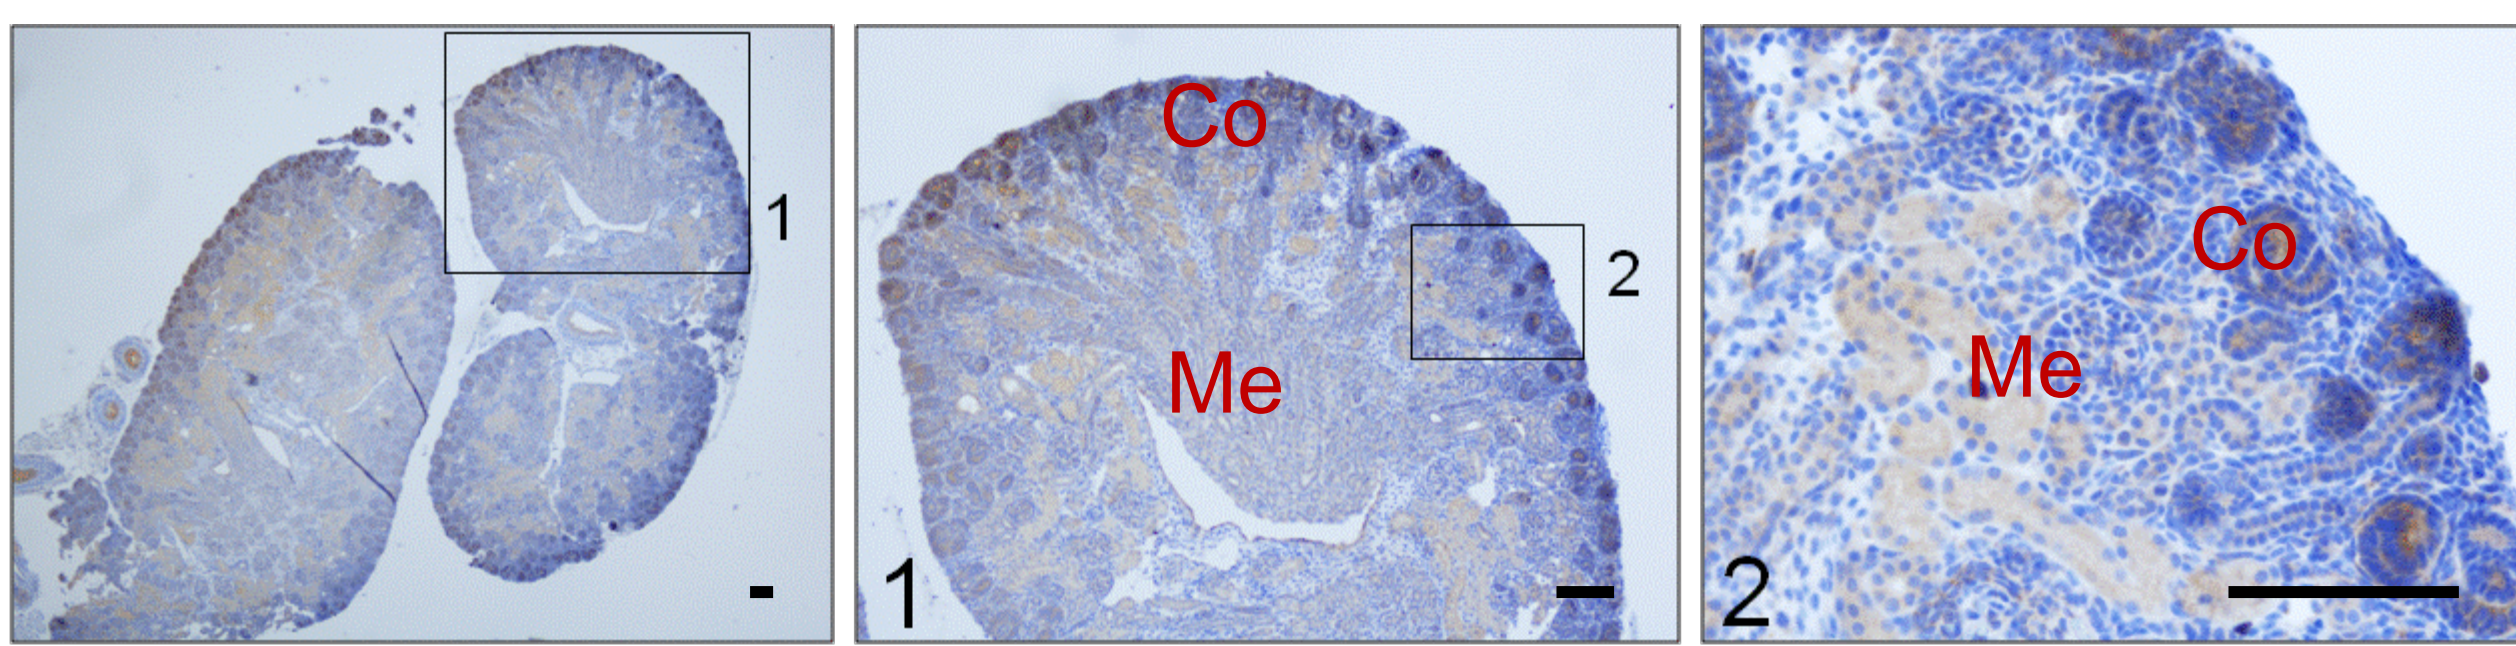

8 Gray

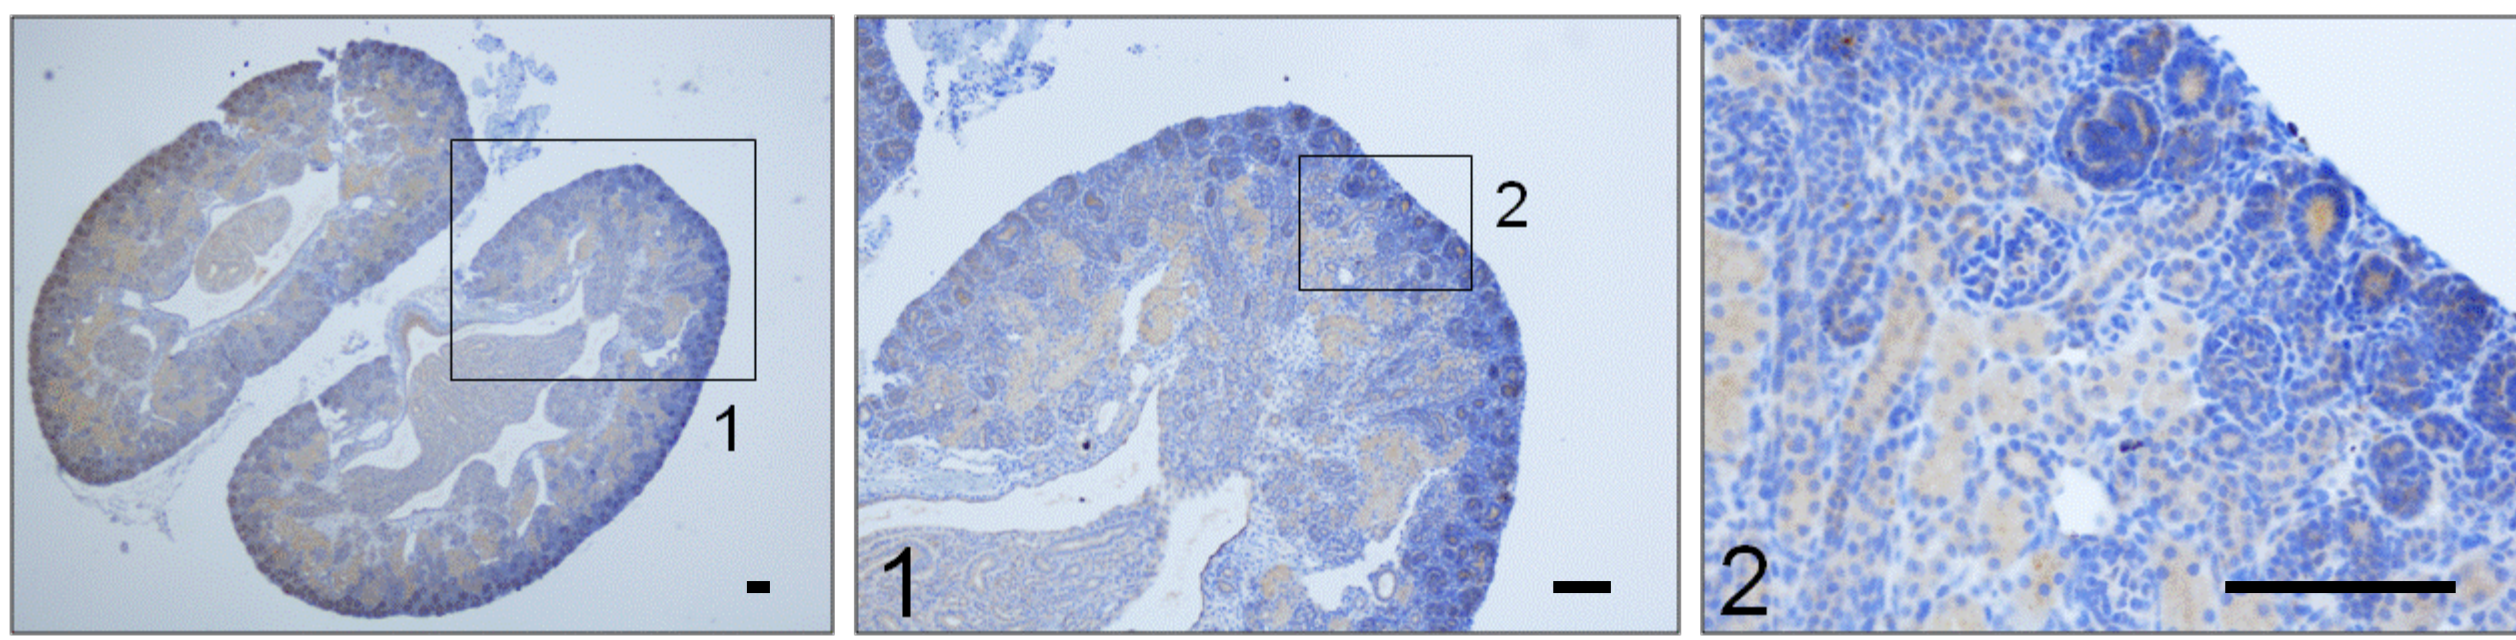

Sham

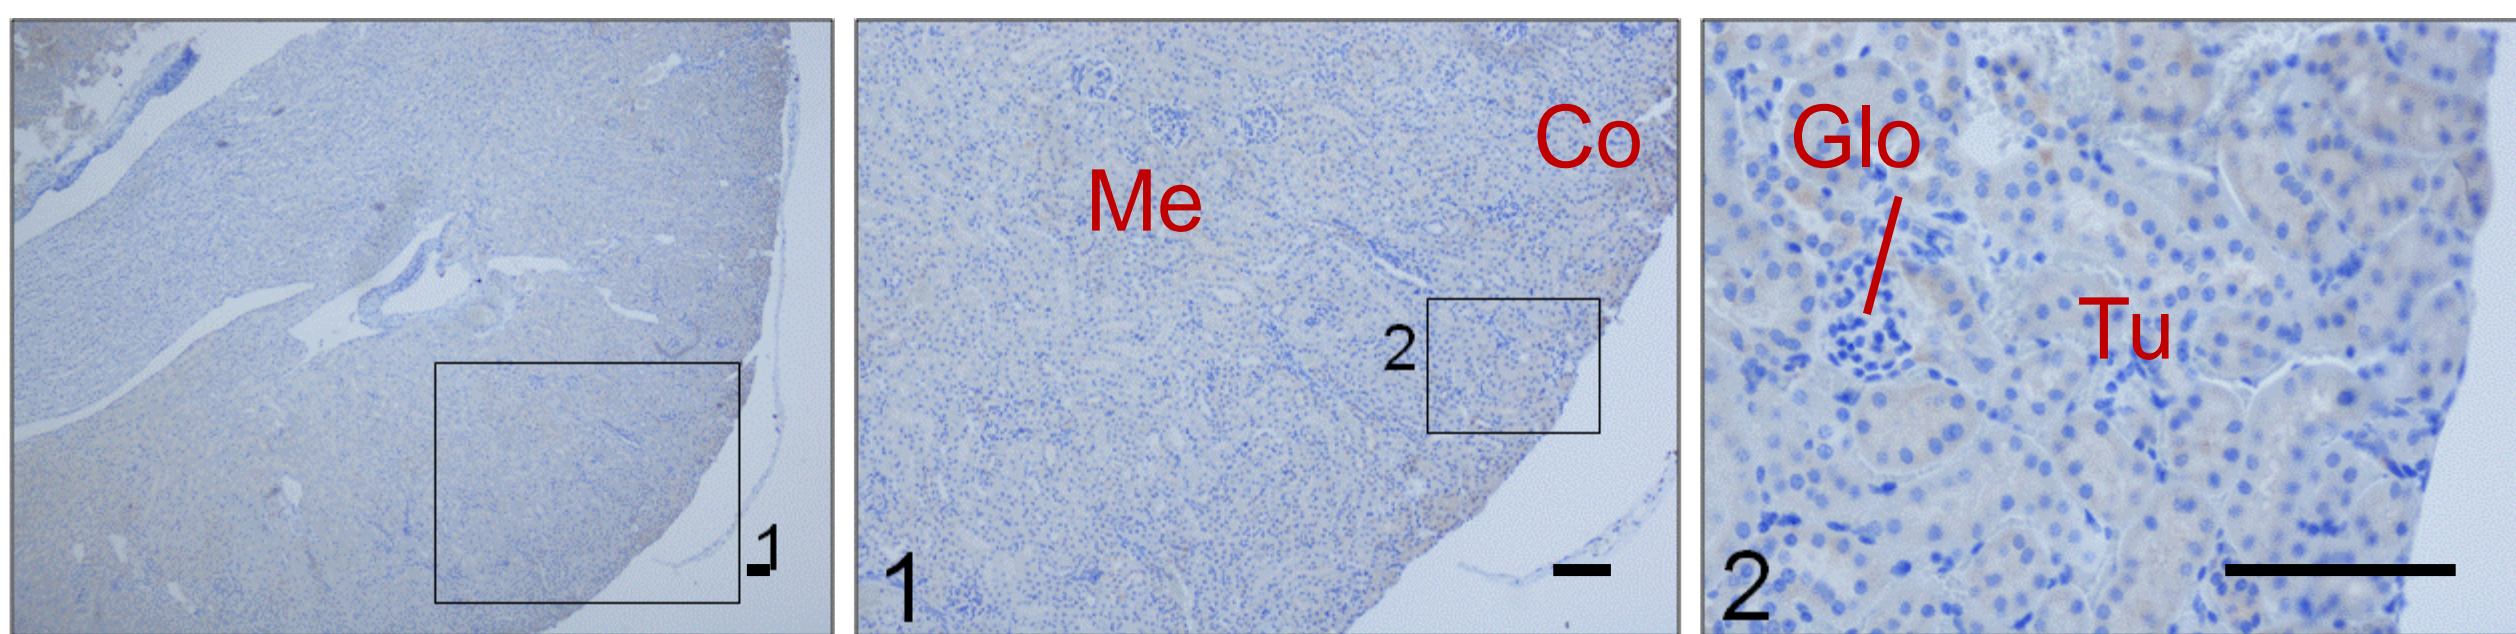

8 Gray

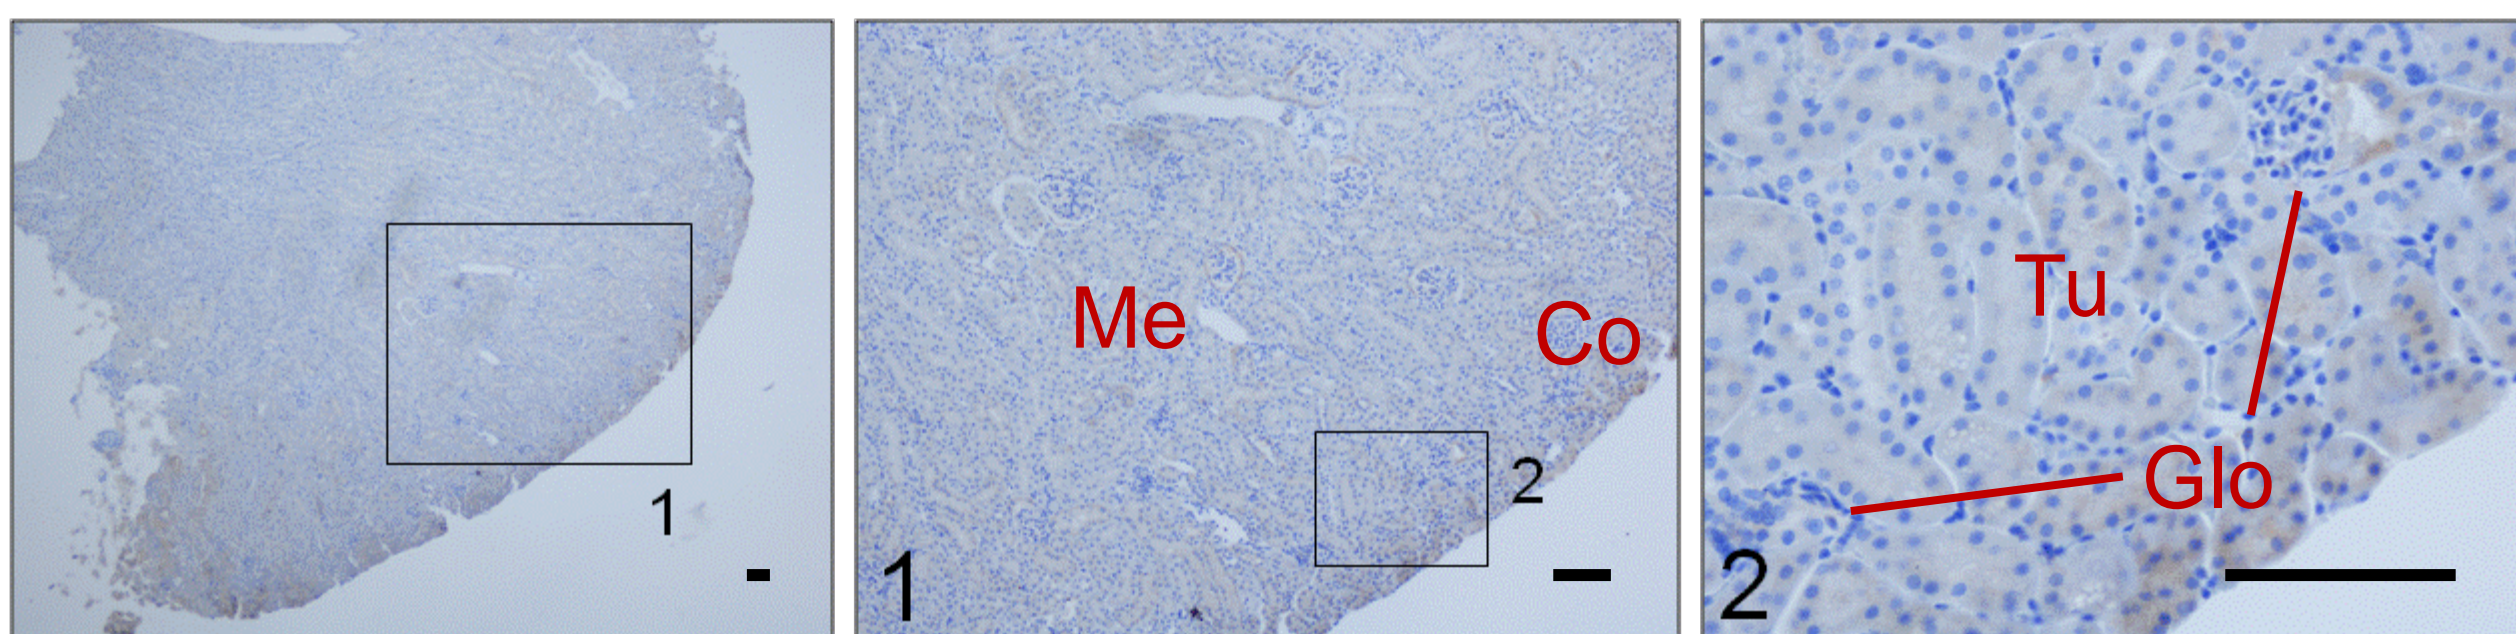

Sham

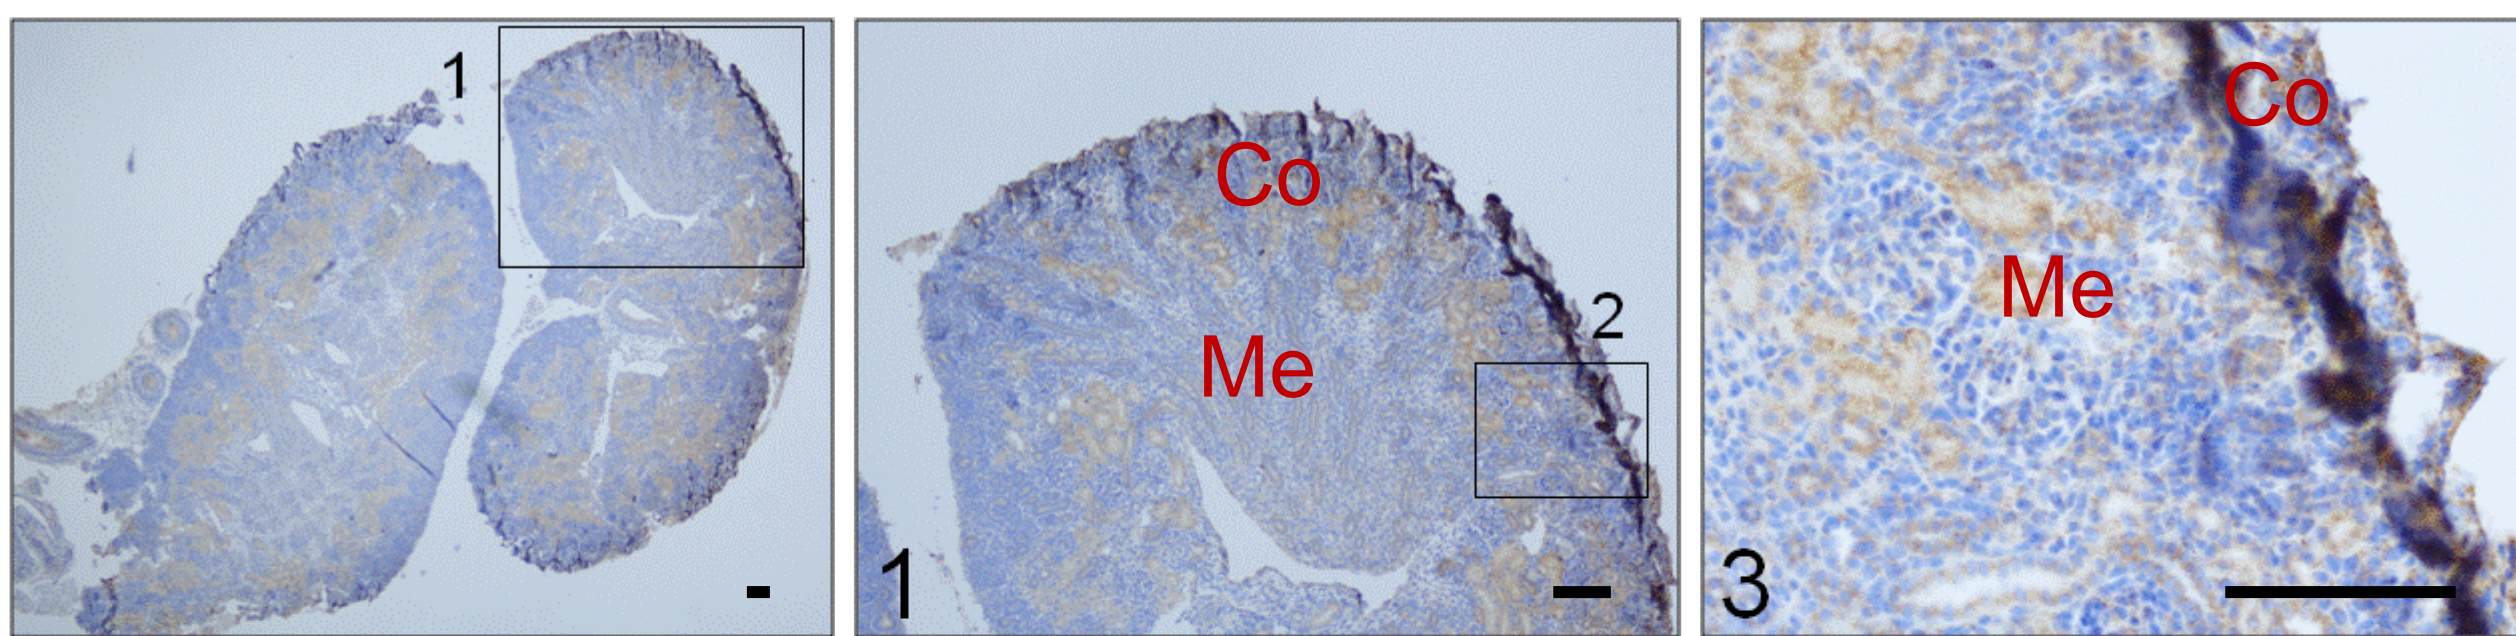

8 Gray

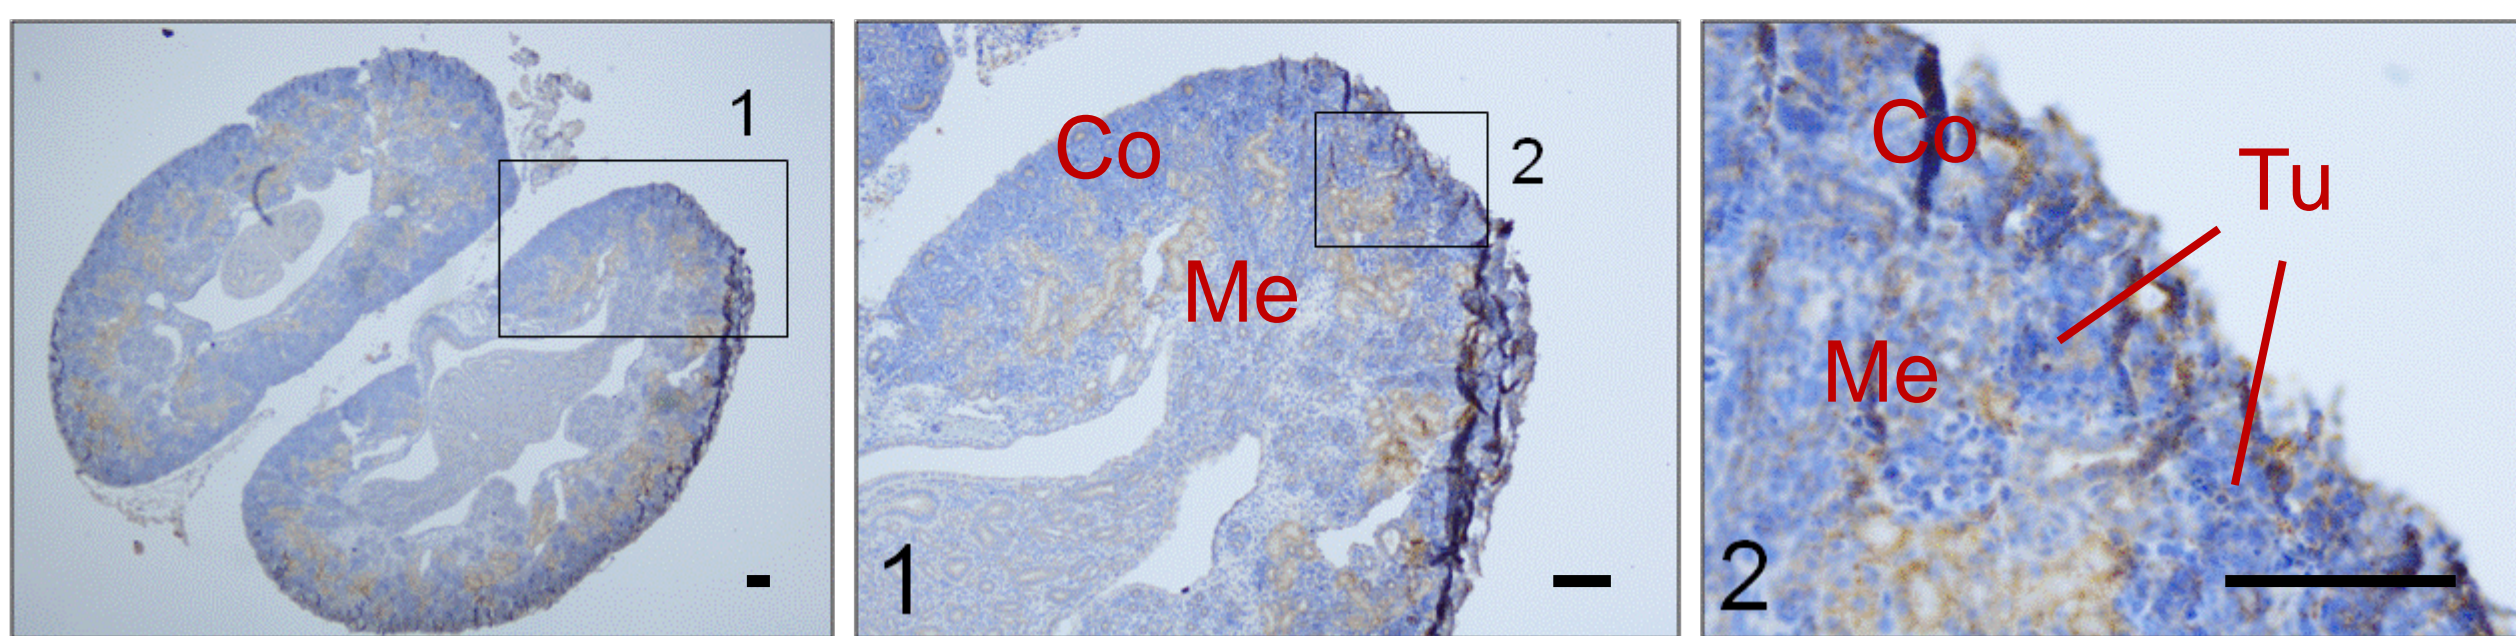

Sham

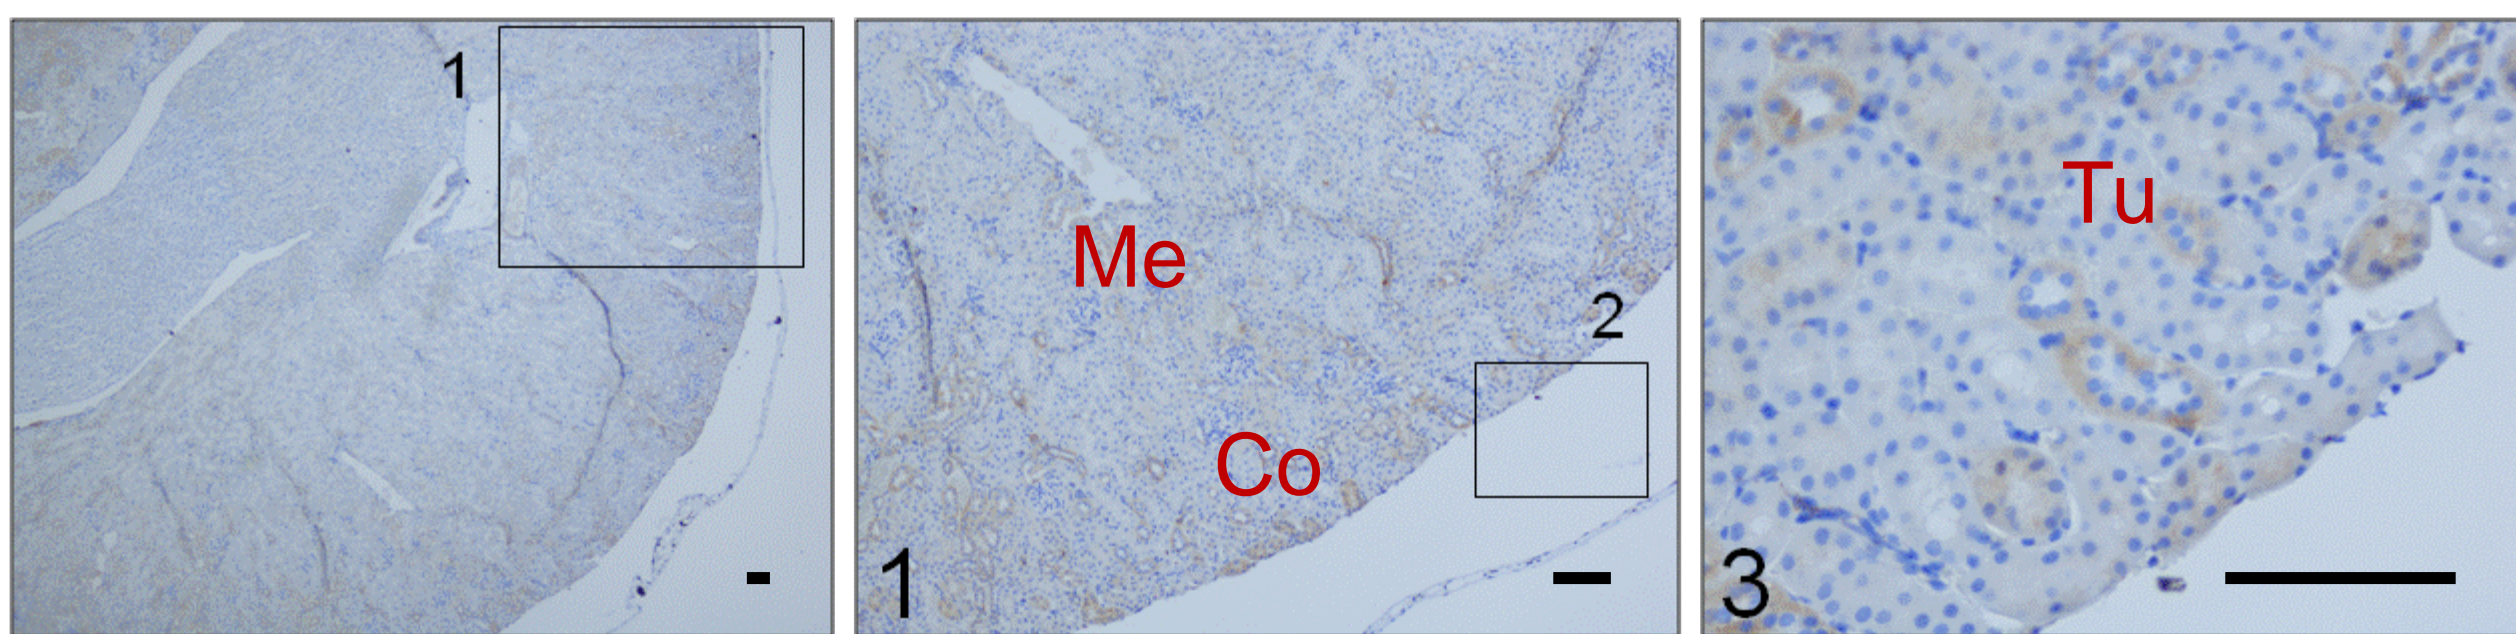

8 Gray

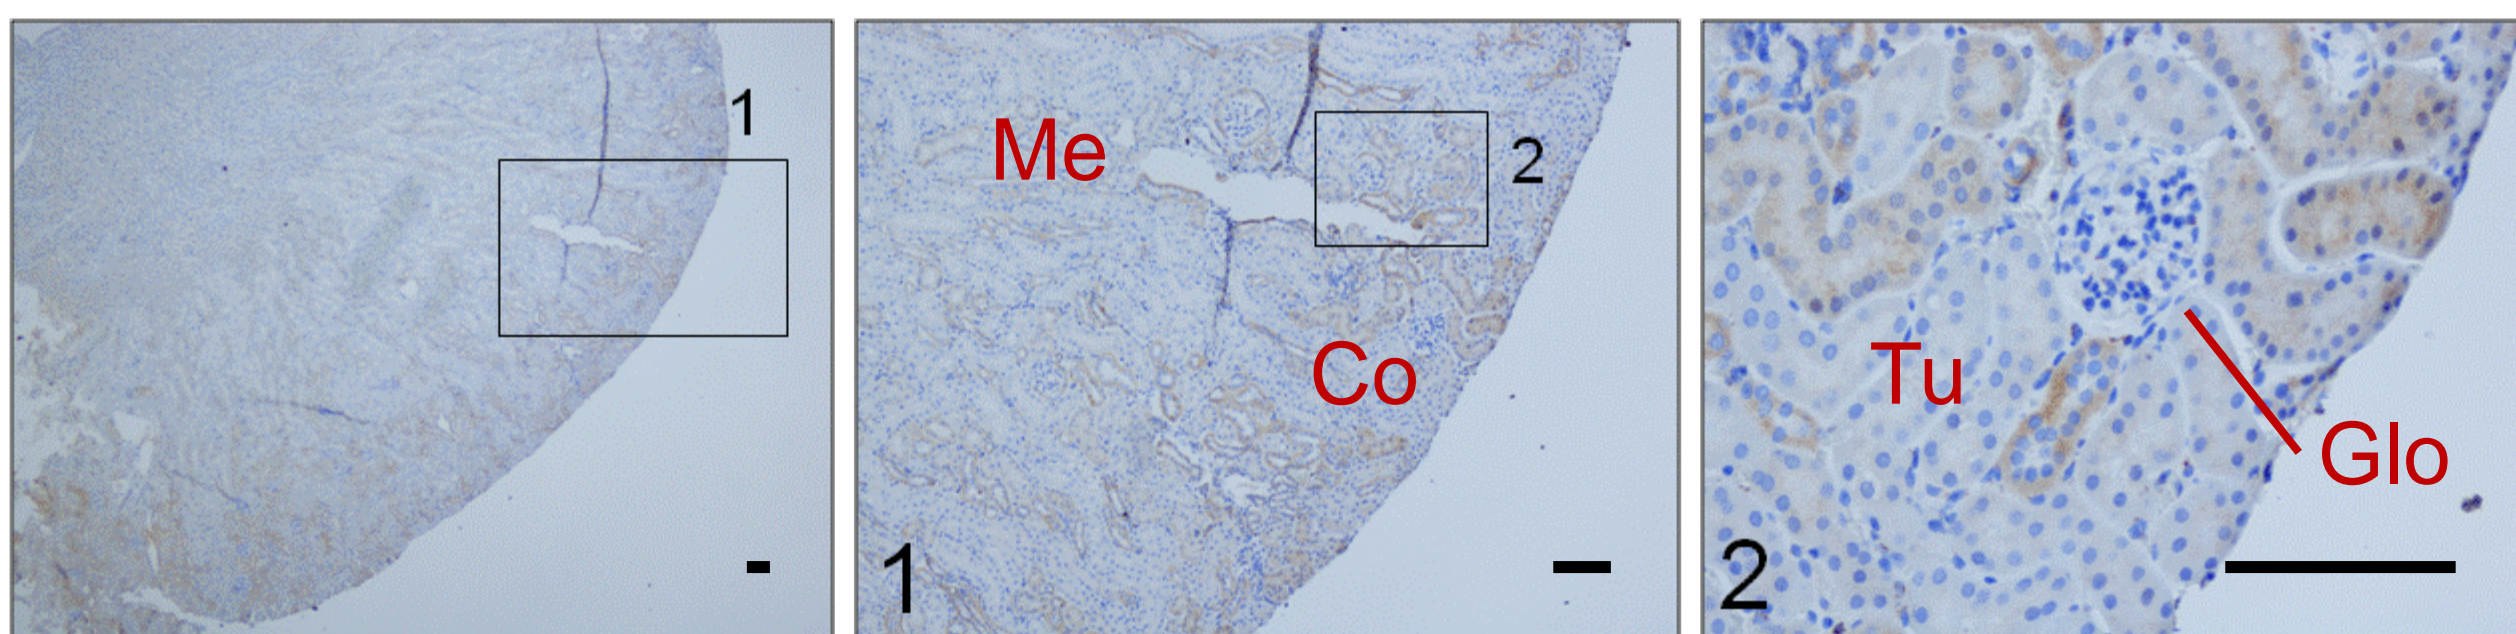

P0

Adult

BAX

P0

Adult

BAK



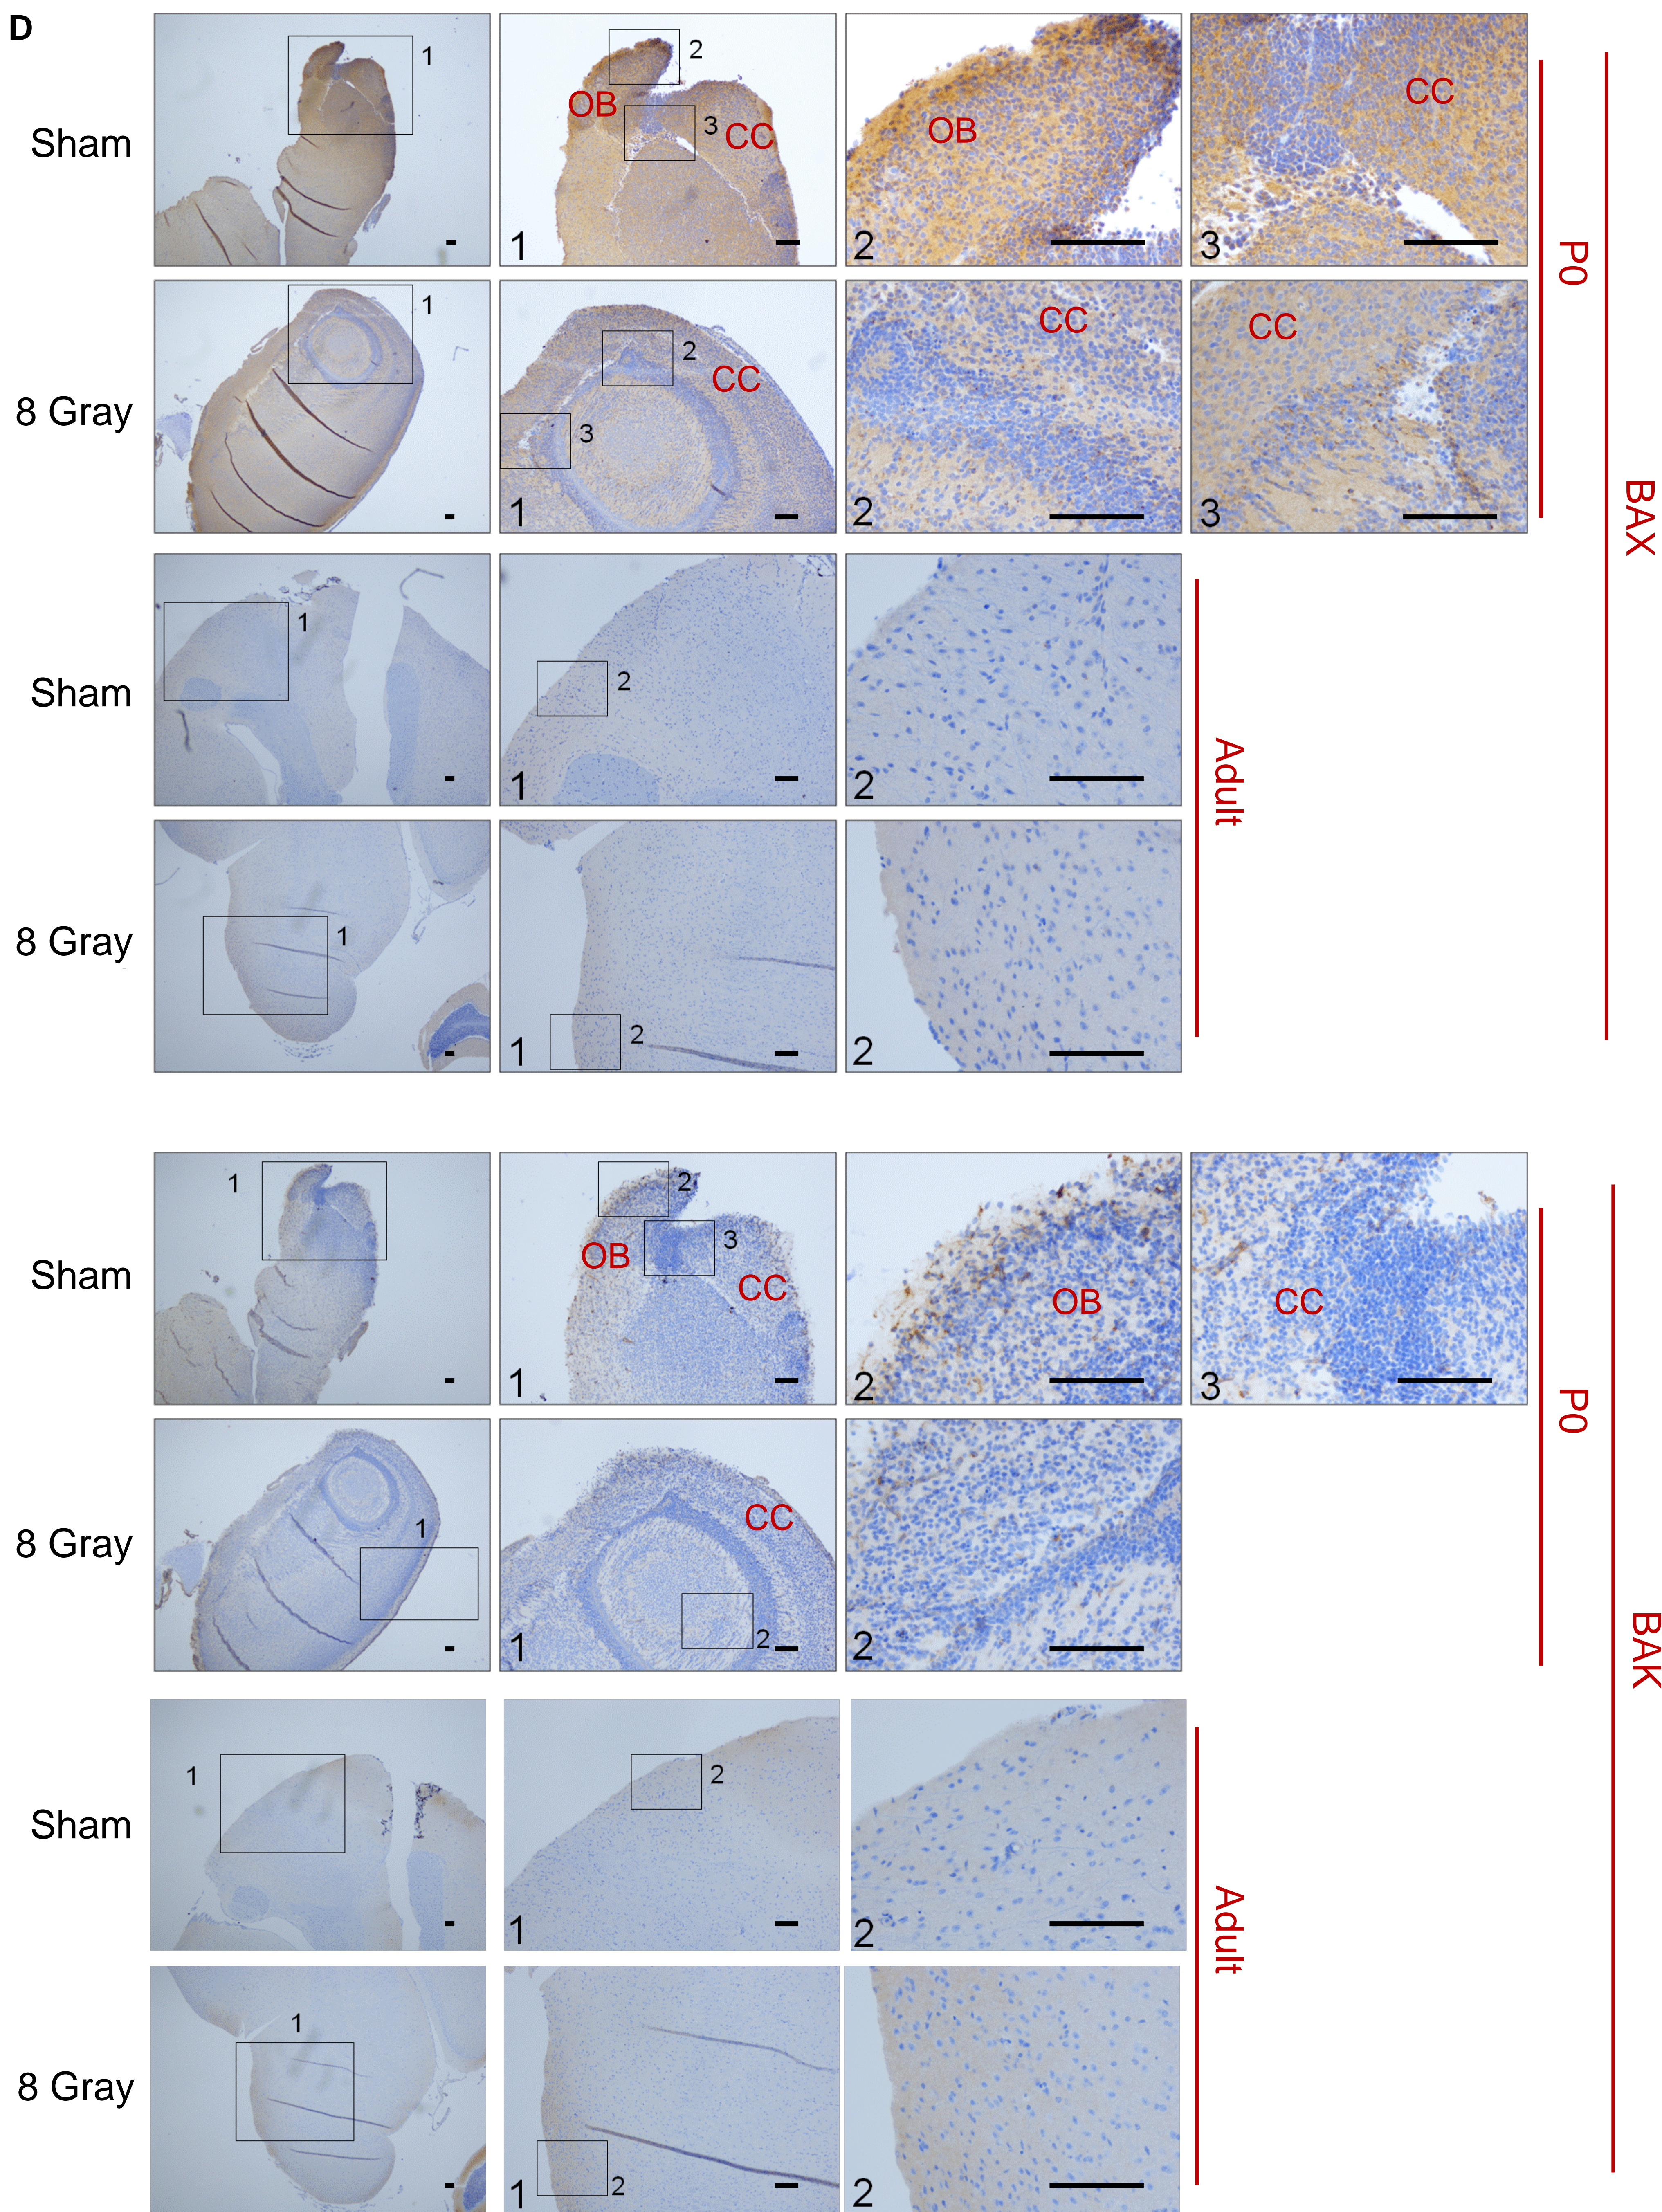



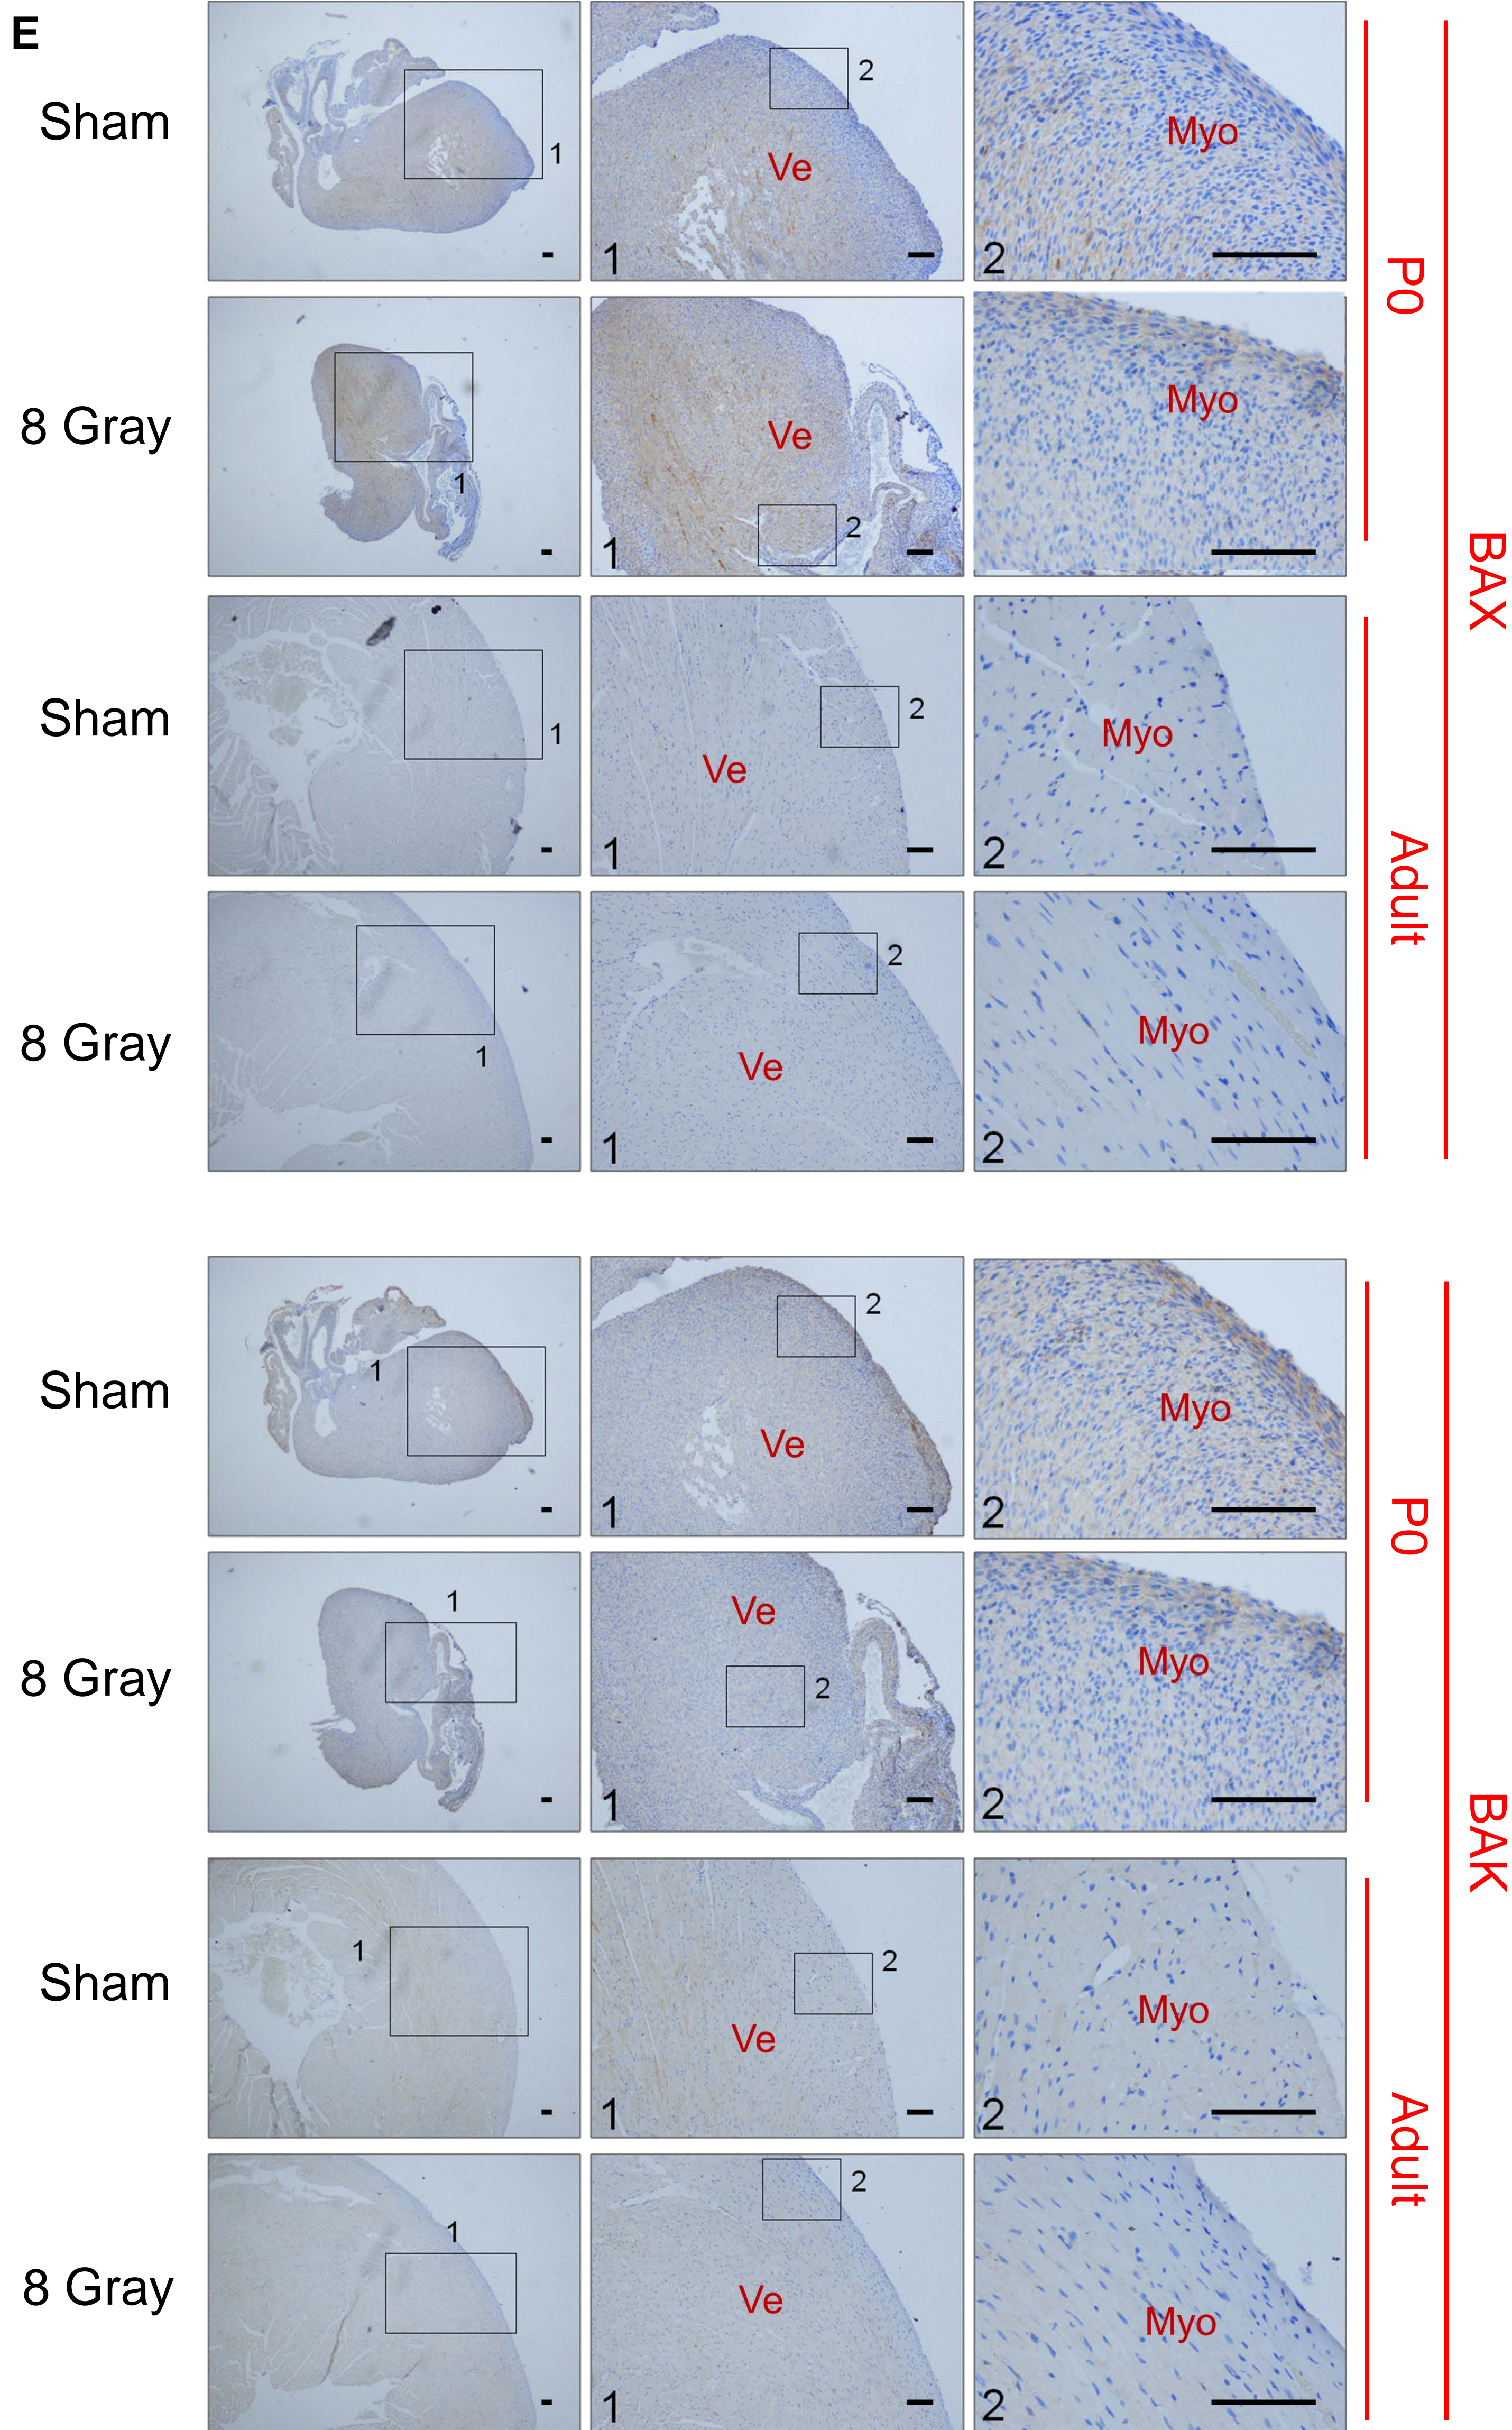

**Figure S3: Detection of BAX and BAK in sham treated or irradiated tissue from adult or early postnatal mice (Related to Figure 4).** After whole body irradiation, BAX and BAK were stained in the spleen (A), liver (B), kidney (C), brain (D) and heart (E). Brown staining indicates detection of the indicated protein. (A) “RP” designates red pulp while “WP” designates white pulp within spleen. (B) “TEV” designates terminal hepatic venule; “HP” designates hepatocyte plates; “HC” designates hematopoietic cells. (C) “Co” designates kidney cortex; “Me” designates kidney medulla; “Tu” designates tubules; “Glo” designates Glomerulus. (D) “OB” designates olfactory bulb while “CC” designates cerebral cortex. (E) “Ve” designates ventricle while “Myo” designates myocardium. All images are representative of two independent experiments. Scale bars are 200  $\mu\text{m}$ .



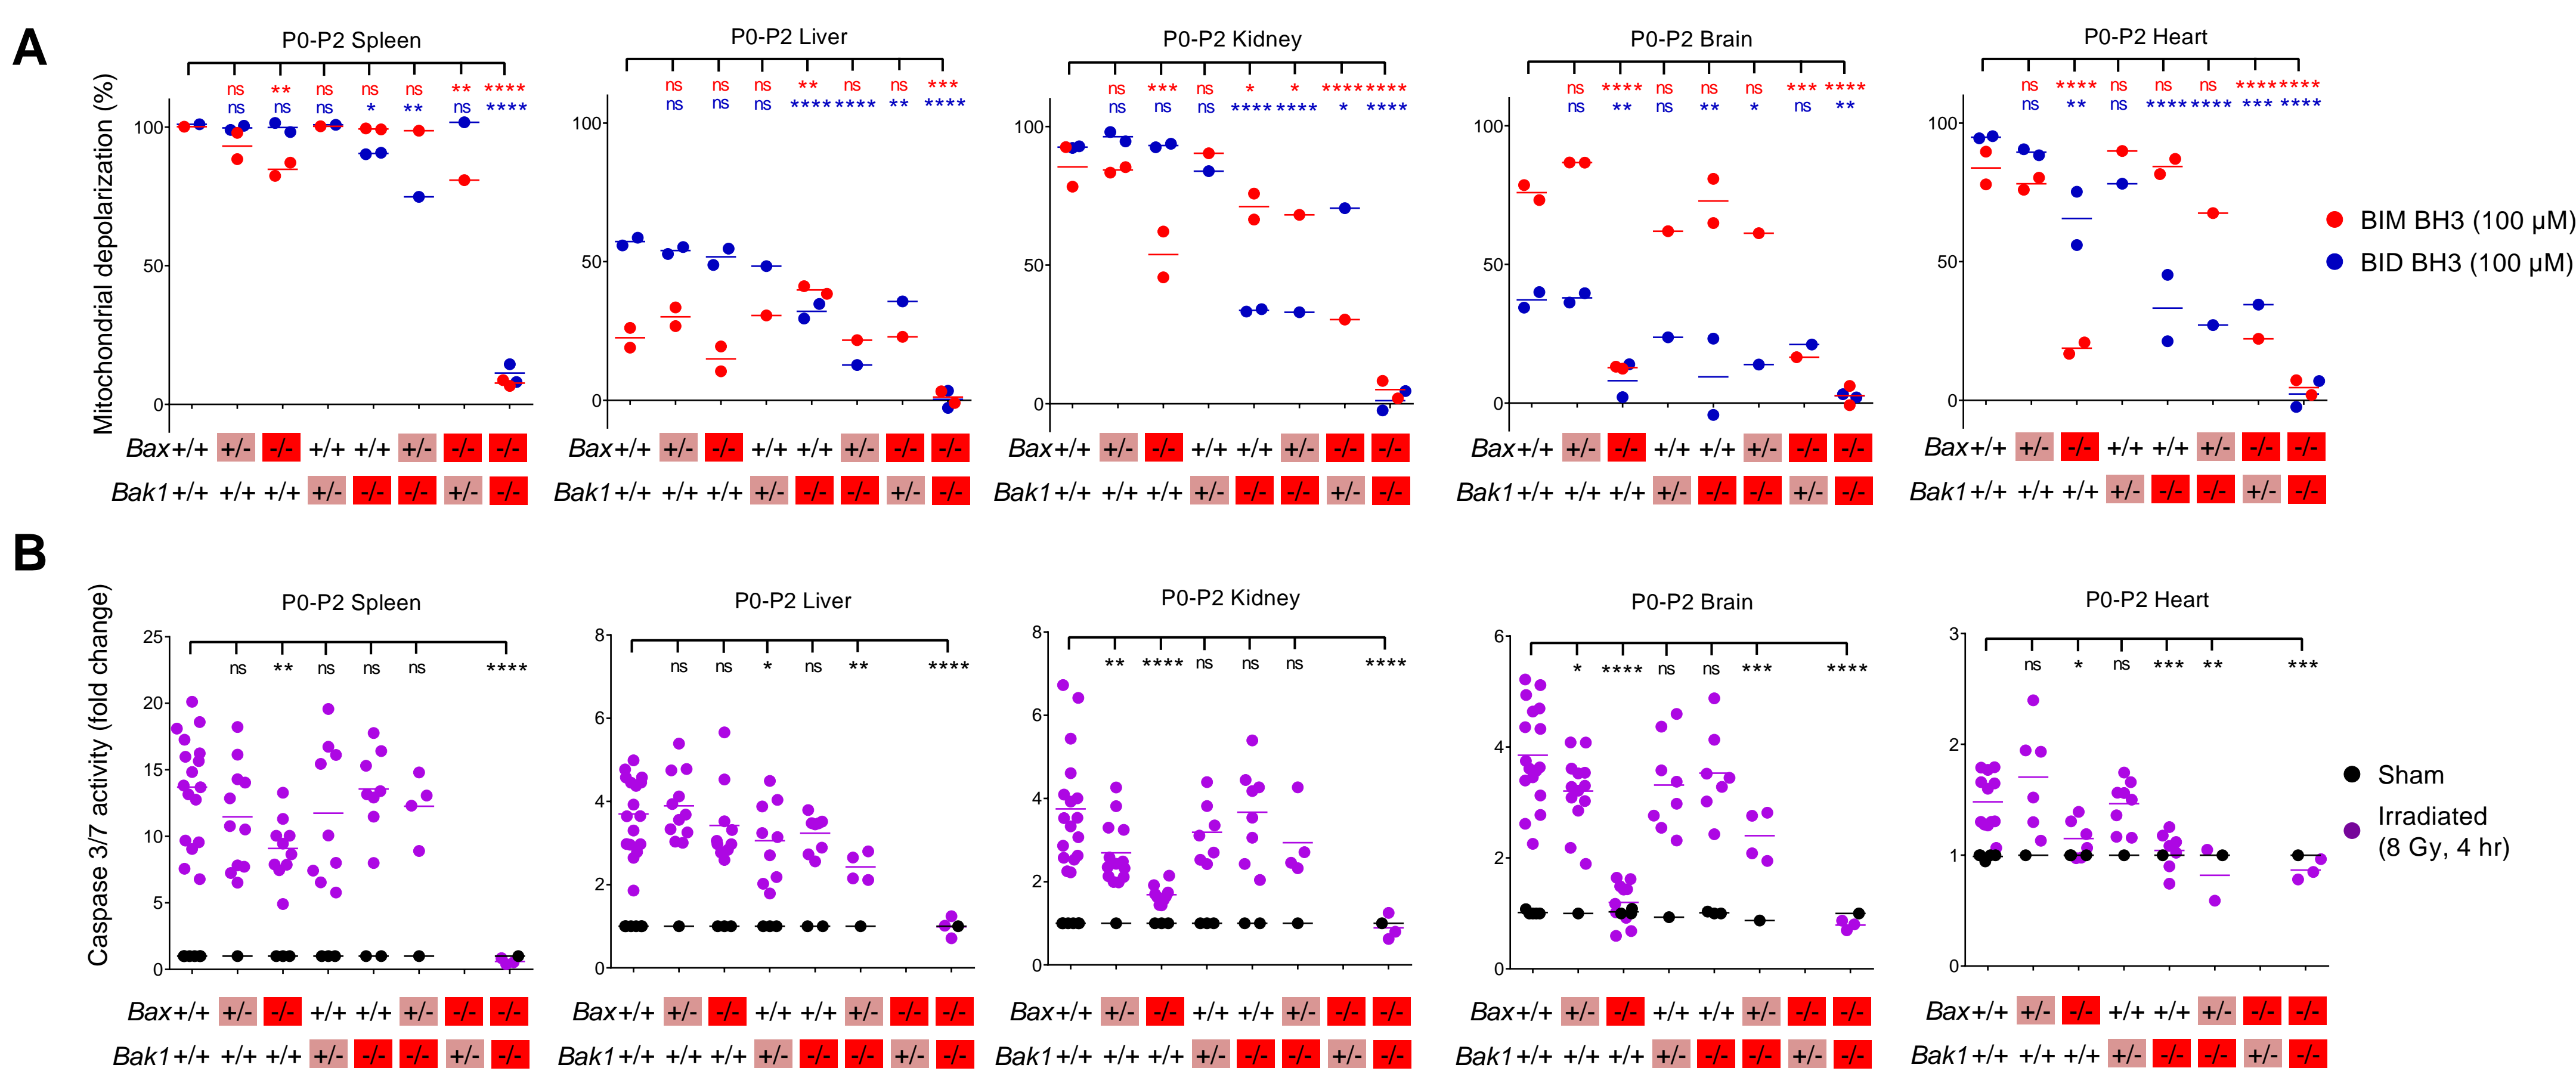

**Figure S4: BAX and BAK dependence in early postnatal mouse tissues (Related to Figure 5).** (A) Summary BH3 Profiling data from P0-P2 mouse tissues of indicated genotypes. Each point represents the mean of 3 measurements in each tissue across 4 IEs. Horizontal bars represent means. (B) Summary caspase 3 activity data from P0-P2 mouse tissues after whole body irradiation. Each point represents an average of 3 measurements in each tissue across 11 IEs. Horizontal bars represent means.



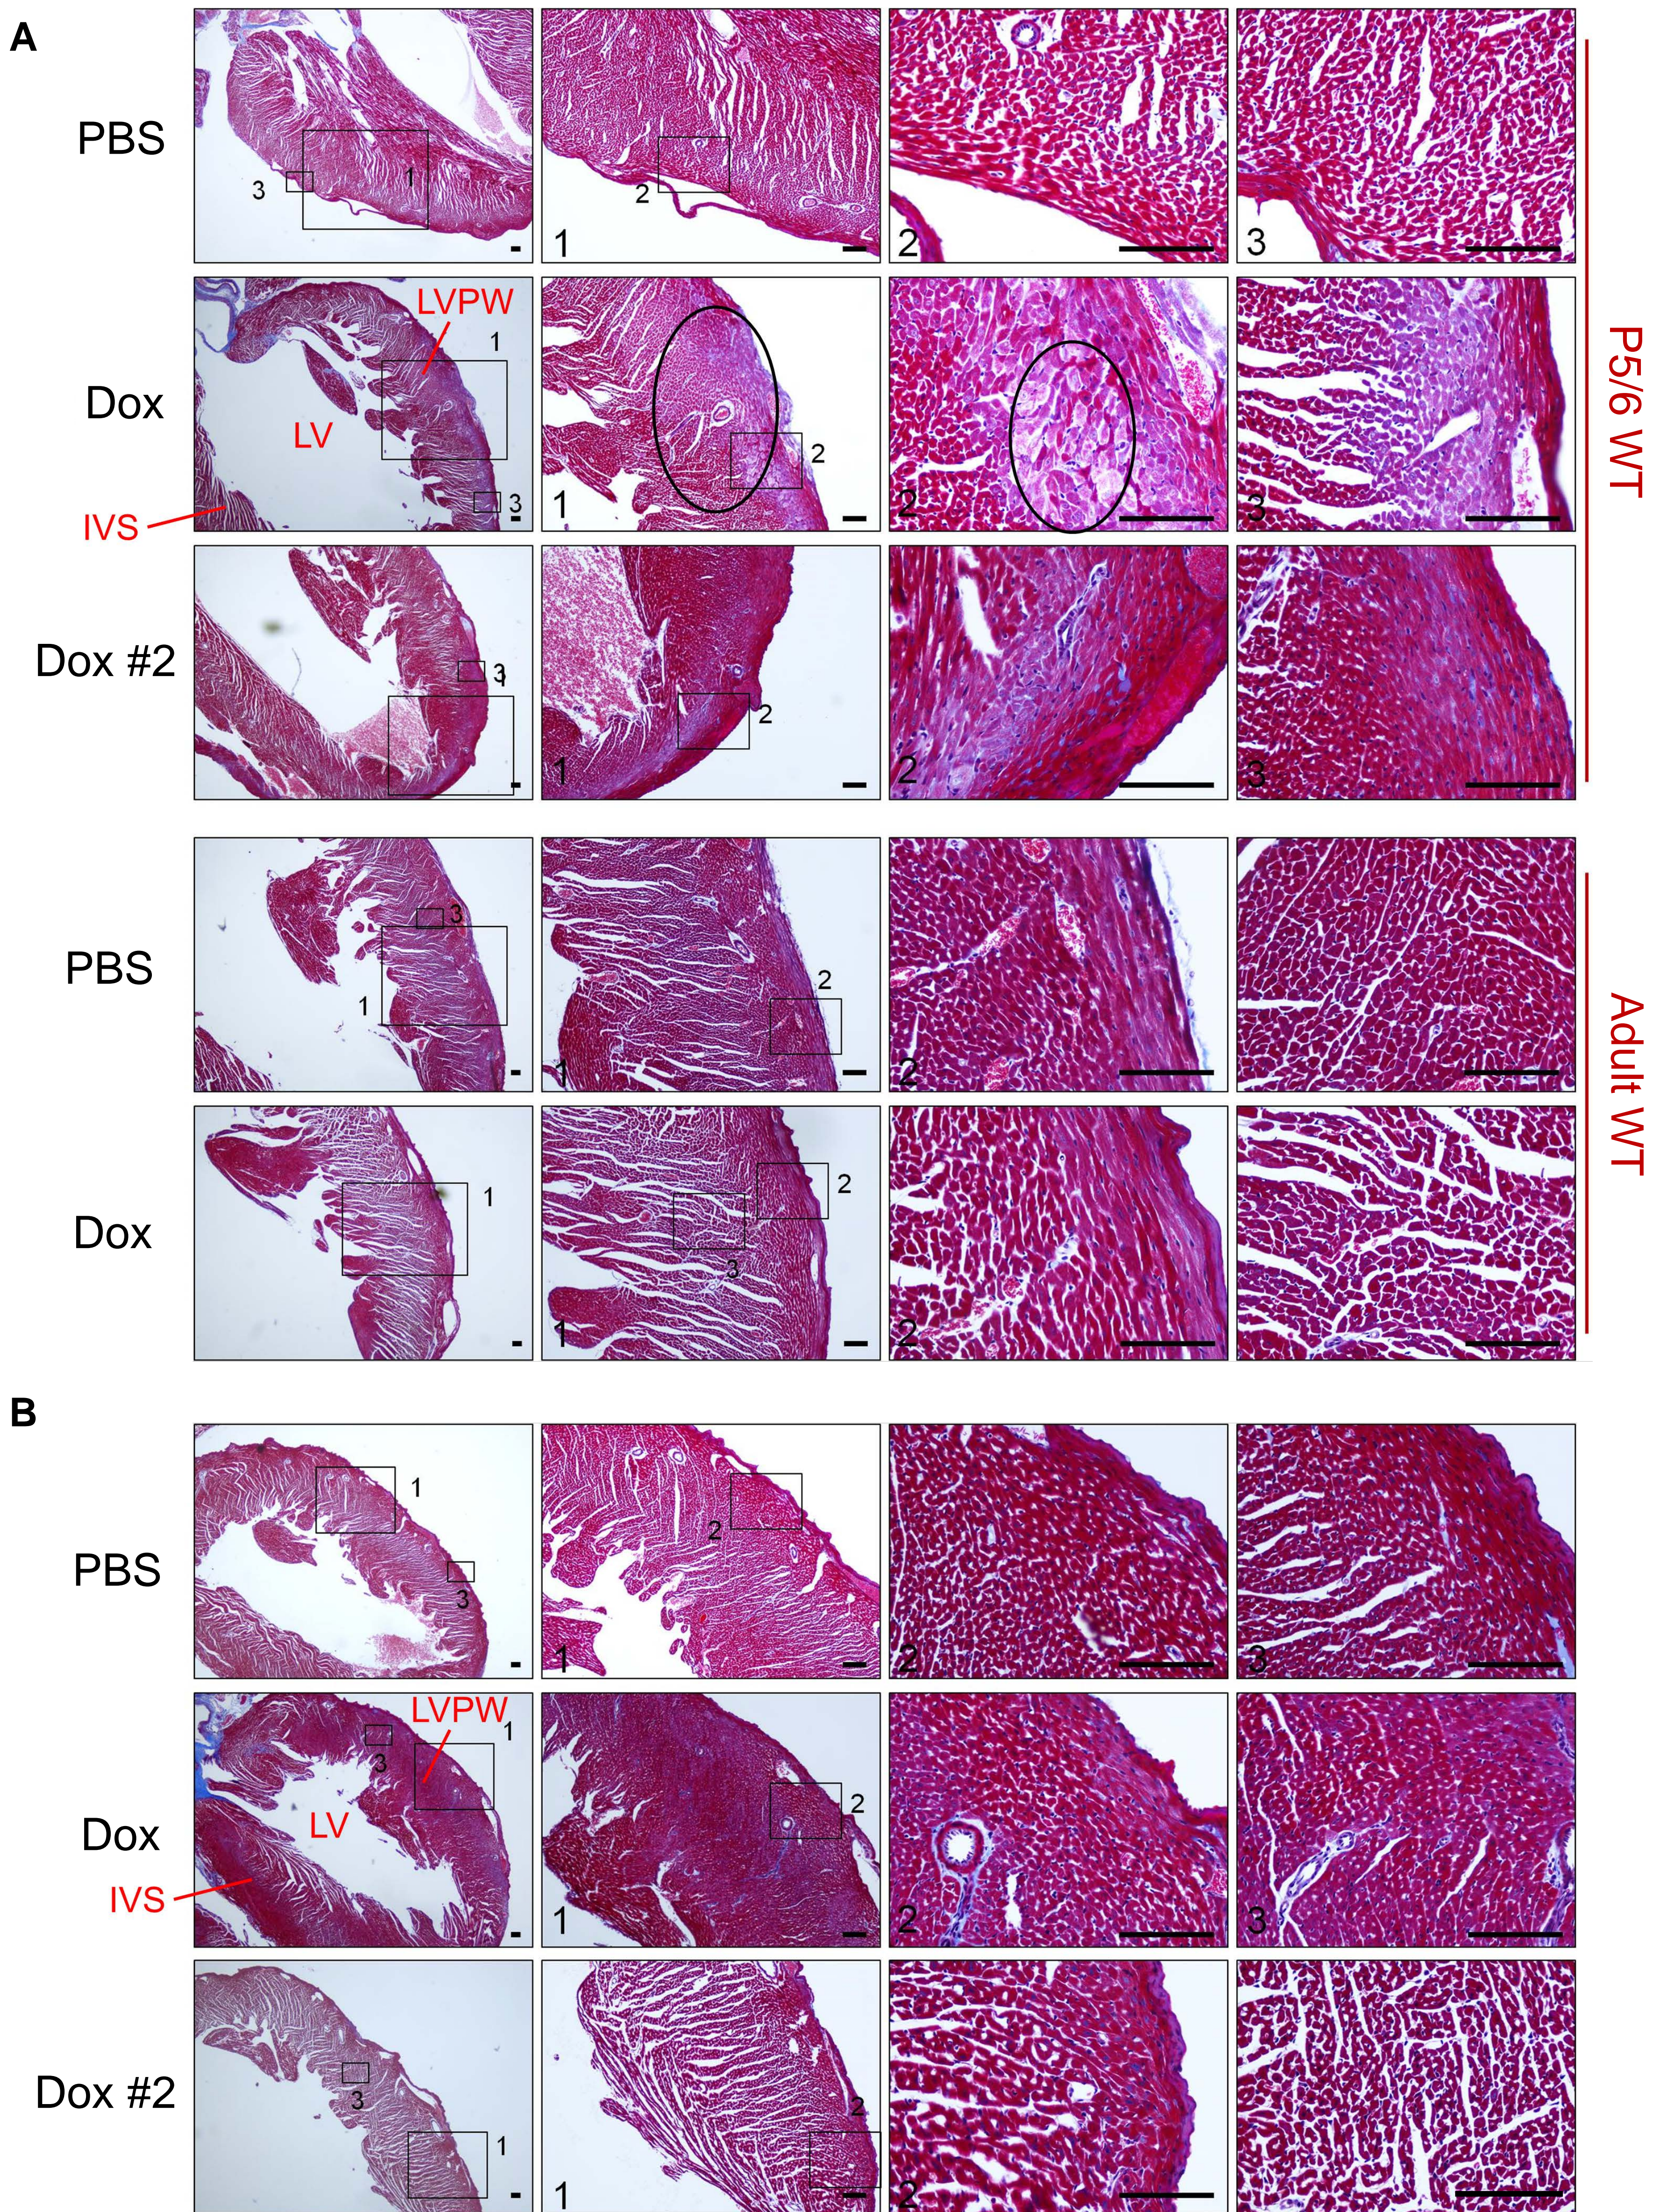

**Figure S5: Early postnatal mouse hearts show increased sensitivity to doxorubicin treatment, which is reduced in mice lacking BAX and BAK (Related to Figure 6).** (A) Mice of indicated ages were injected with three doses of PBS (vehicle) or doxorubicin (5 mg/kg) and heart tissue was stained with Masson's Trichrome Stain (MTS). (B) P5/6 *Bax*<sup>-/-</sup> *Bak1*<sup>-/-</sup> mice were treated as in (A). For general orientation, "LV" designates left ventricle; "IVS" designates interventricular septum; "LVPW" designates left ventricular posterior wall. Black ovals mark the myocardium which shows early signs of injury. These signs of injury include appearance of "foamy cells," altered myocyte structure, myocyte dropout and hypereosinophilic appearance to the myocardium. Note that signs of injury are less apparent in the adult as well as *Bax*<sup>-/-</sup> *Bak1*<sup>-/-</sup> mice. Scale bars are 200 μm.



**Movie S1: Echocardiogram of WT mouse treated with PBS starting at P5 (Related to Figure 6). Provided as a movie in supplemental materials.** A WT mouse was treated with three doses of PBS on day 0, 4, and 7, starting at postnatal day 5 (P5). Echocardiogram was performed at day 14. Movie depicts parasternal long-axis view of beating heart. Normal interventricular septal wall and posterior wall thickness can be observed, along with normal ejection fraction (measurement of how much blood the left ventricle pumps out with each contraction).

**Movie S2: Echocardiogram of WT mouse treated with doxorubicin starting at P5 (Related to Figure 6). Provided as a movie in supplemental materials.** A WT mouse was treated with three doses of doxorubicin (5mg/kg) on day 0, 4, and 7, starting at postnatal day 5 (P5). Echocardiogram was performed at day 14. Movie depicts parasternal long-axis view of beating heart. Reduced interventricular septal wall and posterior wall thickness can be observed, along with reduced ejection fraction (measurement of how much blood the left ventricle pumps out with each contraction).



**Table S3: Human brain specimen details (Related to Figure 7).**

| Sample ID | Secondary ID (if applicable) | Age                 | Months post conception | Diagnosis                                         | Laterality | Brain Region               | Surgery                                                 | BIM BH3 (100µM) | BID BH3 (100µM) |
|-----------|------------------------------|---------------------|------------------------|---------------------------------------------------|------------|----------------------------|---------------------------------------------------------|-----------------|-----------------|
| 25        | N/A                          | 0 years, 4 months   | 14                     | Diffuse cortical dysplasia                        | Right      | Temporal lobe              | Temporal lobectomy                                      | 35.4%           | 47.5%           |
| 4         | N/A                          | 0 years, 9 months   | 19                     | Sturge-Weber syndrome                             | Left       | Anterior temporal lobe     | Functional hemispherectomy                              | 36.2%           | 32.9%           |
| 23        | A                            | 0 years, 9 months   | 19                     | Perinatal stroke                                  | Left       | Medial temporal lobe       | Functional hemispherectomy                              | 22.3%           | 16.6%           |
| 23        | B                            | 0 years, 9 months   | 19                     | Perinatal stroke                                  | Left       | Lateral temporal lobe      | Functional hemispherectomy                              | 27.5%           | 13.9%           |
| 24        | N/A                          | 0 years, 11 months  | 21                     | Focal cortical dysplasia                          | Left       | Hippocampus                | Anterior temporal lobectomy                             | 26.9%           | 22.6%           |
| 8         | N/A                          | 1 year, 0 months    | 22                     | Tuberous sclerosis                                | Left       | Temporal lobe              | Anterior temporal lobectomy                             | 21.3%           | 26.7%           |
| 3         | N/A                          | 1 year, 0.5 months  | 22.5                   | Perinatal stroke                                  | Left       | Hippocampus                | Hemispheric disconnection                               | 24.5%           | 40.1%           |
| 8         | N/A                          | 1 year, 7 months    | 29                     | Tuberous sclerosis                                | Left       | Lateral temporal lobe      | Temporal lobectomy                                      | 26.5%           | 19.3%           |
| 14        | N/A                          | 1 year, 7 months    | 29                     | Focal cortical dysplasia; not otherwise specified | Right      | Frontal lobe               | Hemispheric disconnection                               | 25.4%           | 28.4%           |
| 18        | N/A                          | 1 year, 7 months    | 29                     | Focal cortical dysplasia; not otherwise specified | Left       | Frontal lobe               | Frontal resection                                       | 15.6%           | 16.3%           |
| 11        | N/A                          | 1 year, 9 months    | 31                     | Focal cortical dysplasia IIa                      | Left       | Frontal lobe               | Frontal resection                                       | 25.9%           | 26.5%           |
| 12        | N/A                          | 2 years, 6 months   | 40                     | Focal cortical dysplasia; not otherwise specified | Left       | Frontal lobe               | Functional hemispherectomy with posterior disconnection | 20.4%           | 22.9%           |
| 2         | N/A                          | 3 years, 10 months  | 56                     | Malformation of cortical development              | Right      | Lateral temporal lobe      | Modified perisylvian functional hemispherectomy         | 22.1%           | 16.0%           |
| 16        | B                            | 5 years, 3.5 months | 73.5                   | Focal cortical dysplasia IIa                      | Left       | Intermediate temporal lobe | Temporal lobectomy                                      | 22.6%           | 19.9%           |
| 16        | C                            | 5 years, 3.5 months | 73.5                   | Focal cortical dysplasia IIa                      | Left       | Lateral temporal lobe      | Temporal lobectomy                                      | 17.6%           | 11.8%           |
| 17        | A                            | 5 years, 7 months   | 77                     | Focal cortical dysplasia Ia                       | Left       | Lateral temporal lobe      | Anterior temporal lobectomy                             | 11.5%           | 6.5%            |
| 17        | B                            | 5 years, 7 months   | 77                     | Focal cortical dysplasia Ia                       | Left       | Hippocampus                | Anterior temporal lobectomy                             | 7.7%            | 8.3%            |
| 17        | C                            | 5 years, 7 months   | 77                     | Focal cortical dysplasia Ia                       | Left       | Parahippocampus            | Anterior temporal lobectomy                             | 12.9%           | 12.2%           |
| 7         | N/A                          | 5 years, 11 months  | 81                     | Rasmussen Encephalitis                            | Left       | Lateral temporal lobe      | Functional hemispherectomy                              | 17.2%           | 21.2%           |
| 6         | N/A                          | 6 years, 11 months  | 93                     | Focal cortical dysplasia IIb                      | Right      | Frontal lobe               | Frontal resection                                       | 4.7%            | 19.1%           |
| 13        | N/A                          | 9 years, 4 months   | 122                    | Polymicrogyria                                    | Left       | Frontal lobe               | Frontotemporal resection                                | 13.8%           | 10.3%           |
| 15        | B                            | 14 years, 9 months  | 187                    | Stroke - gliosis                                  | Left       | Hippocampus                | Functional hemispherectomy                              | 2.0%            | 5.2%            |
| 15        | C                            | 14 years, 9 months  | 187                    | Stroke - gliosis                                  | Left       | Parietal lobe              | Functional hemispherectomy                              | 6.7%            | 2.0%            |
| 19        | A                            | 15 years, 8 months  | 198                    | prior tumor - gliosis                             | Right      | Temporal lobe              | Anterior temporal lobectomy                             | 8.0%            | 7.0%            |
| 19        | B                            | 15 years, 8 months  | 198                    | prior tumor - gliosis                             | Right      | Medial temporal lobe       | Anterior temporal lobectomy                             | 12.0%           | 10.0%           |
| 1         | N/A                          | 18 years, 10 months | 236                    | Focal cortical dysplasia IIb                      | Left       | Frontal lobe               | Frontal resection                                       | 2.2%            | 13.8%           |
| 9         | N/A                          | 19 years, 1 month   | 239                    | Gliosis                                           | Left       | Temporal lobe              | Anterior temporal lobectomy                             | 7.8%            | 12.9%           |
| 10        | N/A                          | 21 years, 0 months  | 262                    | Trauma - gliosis                                  | Right      | Temporal lobe              | Anterior temporal lobectomy                             | 0.1%            | 5.9%            |
| 20        | N/A                          | 21 years, 0 months  | 262                    | Focal cortical dysplasia; not otherwise specified | Left       | Temporal lobe              | Temporal lobe resection                                 | 6.8%            | 0.3%            |



## Supplemental Experimental Procedures

Mouse strains, breeding and treatments: The following mouse strains were used: C57BL/6J (WT) (Jackson Laboratories #000664, Bar Harbor ME) B6.129X1-Bax<sup>tm1</sup>Sjk/J (*Bax* Knockout) (Jackson Laboratories #002994) B6.129-Bak1<sup>tm1</sup>Thsn/J (*Bak1* Knockout) (Jackson Laboratories #004183) FVB/N-Gt(ROSA)26Sor<sup>tm1.1</sup>(MYC/ERT<sup>2</sup>)<sup>Gev</sup> (Rosa26-MycER<sup>T2</sup>) (available upon request from Gerard Evan, Cambridge University). Heterozygous male and female mice were bred to produce WT, heterozygous and KO litter-matched animals for analysis. To produce double knockout mice (*Bax*<sup>-/-</sup>, *Bak1*<sup>-/-</sup>) (DKO), male and female *Bax*<sup>+/-</sup>, *Bak1*<sup>-/-</sup> mice were bred (DKO males and females as well as *Bax*<sup>-/-</sup> males are sterile). DKO mice were born at Mendelian frequencies, as previously reported (Lindsten et al., 2000), but experienced frequent perinatal lethality, with only a subset surviving to adulthood. Genotypes were confirmed with PCR of DNA samples from tail snips (Transnetyx, Cordova TN). For irradiation experiments, litter-matched mice were placed in an acrylic irradiation pie cage (Braintree Scientific, Braintree MA) and irradiated in a Gammacell 40 “Extractor” (Best Theratronics Ltd., Ottawa, ON Canada) for the time required to deliver the desired dose. Acute doxorubicin (Sigma-Aldrich) treatments (to assess levels of apoptosis soon after dosing) were done by injecting litter-matched mice intraperitoneally (IP) with one dose of the agent at 25 mg/kg or an equal volume of saline. Animals were sacrificed 24 hr later and tissues were collected for downstream analysis (see below). Long-term doxorubicin treatments (to assess heart function via echocardiogram) were done by injecting litter-matched P5/6, P11/12 or adult (P60-P90) mice intraperitoneally with 3 doses of the agent at 5 mg/kg or an equal volume of saline on days 0, 4, and 7, followed by echocardiograms (see below) on day 14. For acute activation of MycER<sup>T2</sup>, tamoxifen dissolved in peanut oil was injected daily at 40 mg/kg.

Human brain specimens: Patients underwent surgery for removal of seizure foci at Boston Children’s Hospital (Table S3) and resected tissues were first delivered to a neuropathologist for evaluation. If available, a de-identified sample (0.2-0.5 g) of brain tissue was provided to study investigators in PBS on ice and was immediately processed for BH3 Profiling. Part of the sample (0.1 g) was excluded for cryopreservation and was subsequently prepared for immunoblotting. The remaining brain tissue was dissociated by repeated pipetting until a single cell suspension was achieved and BH3 Profiled as outlined above.

Tissue isolation from mouse: All mice were euthanized by CO<sub>2</sub> asphyxiation (mice that were less than 14 days old were decapitated following CO<sub>2</sub> administration). To isolate relevant cells from spleen and thymus, organs were mechanically separated in cold PBS using a Potter-ELV tissue grinder (Wheaton, Millville NJ). For bone marrow, femurs were removed and cold PBS was pipetted into one end and allowed to flow through into a collection receptacle and subjected to red blood cell (RBC) lysis using RBC lysis reagent (Qiagen, Germantown MD) according to manufacturer’s instructions. For peripheral blood mononuclear cells (PBMCs), blood was collected from the mouse immediately post mortem, pipetted into cold PBS and subjected to RBC lysis. For heart, kidney, liver, small intestine, large intestine, and lungs, the organ was first coarsely separated and placed into 50 mL of cold PBS, vortexed and then strained through a 70 μM filter to remove leukocytes



and cell debris (flow through). Tissue remaining in the strainer was then mechanically separated using a Potter-ELV tissue grinder. For brain, tissue was placed into cold PBS and repeatedly pipetted (~20 times) until completely dissociated. Aliquots of single cell suspensions were immobilized on a glass slide using cytospin protocol (ThermoFisher Scientific, Waltham MA) stained with Jorvet Dip Quick Stain (Jorgensen Laboratories, Loveland CO), and examined by a trained pathologist (D.R.C.) for >95% purity (less than 5% of cells of hematopoietic origin). In many tissues, all cells analyzed were of the same type, such as hepatocytes in the liver and cardiomyocytes in the heart. Processing time and protocols per tissue type did not differ between neonatal and adult tissues, and total number of tissues processed in batches was limited to ensure processing time was kept below a maximum of 2 hr from time of tissue collection to start of downstream applications including BH3 Profiling or lysate preparation.

Fluorescence-based BH3 Profiling: 15  $\mu$ L of BH3 peptides or recombinant proteins (see below for peptide sequences) in T-EB (300 mM Trehalose [Sigma-Aldrich, St. Louis MO], 10 mM HEPES-KOH pH 7.7 [Sigma-Aldrich], 80 mM KCl [Sigma-Aldrich], 1 mM EGTA [Sigma-Aldrich], 1 mM EDTA [Sigma-Aldrich], 0.1% BSA [Sigma-Aldrich], and 5 mM succinate [Sigma-Aldrich]) was deposited into each well in a non-treated, black 384-well plate, 1 treatment per well, in triplicate for each independent experiment. Single cell suspensions were washed once with T-EB before being resuspended at 4X their final density of  $6.75 \times 10^5$  cells/mL. One volume of the 4X cell suspension was added to one volume of a 4X dye solution containing 4  $\mu$ M JC-1 (Enzo Life Sciences, Farmingdale NY), 40  $\mu$ g/ml oligomycin (Sigma-Aldrich), 0.02% digitonin (Sigma-Aldrich), and 20 mM 2-mercaptoethanol (Life Technologies) in T-EB. The resulting 2X cell/dye solution was kept at room temperature for 5 min to allow for cell permeabilization and dye equilibration. 15  $\mu$ L of the 2X cell/dye mix was then added to each treatment well of the 384-well plate, shaken for 15 seconds inside the plate reader, and the fluorescence at 590 nm was measured every 5 min at 32°C. Peptide treatments that were used corresponded to the BH3 domains of the BCL-2 family proteins, and their respective sequences are as follows: BIM: MRPEIWIAQELRRIGDEFNA; BID: EDIIRNIARHLAQVGDSMDR (New England Peptide, Gardner MA). Relative mitochondrial depolarization was defined as the magnitude of mitochondrial depolarization resulting from BH3 peptide treatment as compared to vehicle DMSO (Sigma-Aldrich) and positive control FCCP (p-trifluoromethoxy carbonyl cyanide phenyl hydrazone) (Sigma-Aldrich). The percentage of mitochondrial depolarization was calculated by comparing the JC1 signal (mitochondrial polarization) in cells treated with each peptide or protein concentration in the following manner:

$$\% \text{ Mitochondrial Depolarization} = [R(t) - F(t)] / [R(t) - \text{FCCP}(t)] * 100$$

where R(t) is the fluorescence value in the reference sample (DMSO), F(t) is the fluorescence value in the test sample (peptide or protein) and FCCP(t) is the fluorescence value in the positive control sample (FCCP) at a time (t) and averaged during the course of the BH3 Profiling assay (from t=20 to 120 min).

Immunoblotting: Immunoblotting was performed as previously described (Montero et al., 2015) Briefly, protein lysates were obtained by cell lysis in Radio Immuno Precipitation Assay (RIPA) buffer (150 mM sodium chloride, 1.0% NP-40, 0.5% sodium deoxycholate,



0.1% sodium dodecyl sulphate, 50 mM Tris, pH 8.0). Protein loading was measured by Protein Assay Dye Reagent (Bio-Rad). Protein samples were electrophoretically separated on NuPAGE 4-12% Bis-Tris polyacrylamide gels (Invitrogen). Heatmaps were generated by normalizing band intensity to loading control (GAPDH). Antibodies used include: BAX (Cell Signaling Technology #2772, Danvers MA); BAK NT (Millipore, Billerica MA); BIM (Cell Signaling Technology #C34C5); BID (clone 11958), BCL-2 3F11 (BD Biosciences, San Jose CA), BCL-X<sub>L</sub> (Cell Signaling Technology #2764), MCL-1 (Rockland Immunochemicals, 600-401-394S), APAF-1 (BD Biosciences), Caspase 3 (Cell Signaling Technology #8G10), Caspase 8 (Cell Signaling Technology #4790), Caspase 9 (Cell Signaling Technology #9508), VDAC (Cell Signaling Technology #4661), XIAP (BD Biosciences #610763), CIAP1 (Cell Signaling Technology #4952), c-Myc (Cell Signaling Technology #13987, Santa Cruz Biotechnology #sc-764, Dallas TX), GAPDH (Cell Signaling Technology #5174).

Echocardiograms: Echocardiograms were obtained at 14 days following initiation of sham or doxorubicin treatment with a Vevo 2100 Imaging digital ultrasound system (VisualSonics, Toronto ON Canada) using a 22-55 MHz (MS550D) for adult and 30-70 MHz (MS700) transducer for neonatal mice, as previously described (Bauer et al., 2011). Prior to echocardiography, each mouse chest wall was shaved. Adult and neonatal mice were then placed on a heated platform in the supine position. Echocardiographic analysis was performed on mice receiving oxygen at a heart rate between 400 and 700 beats/min. Data acquisition was initiated with the parasternal cardiac long axis view followed by transition to a short axis view, at the level of mid-papillary muscles. Echocardiographic measurements were obtained from short axis B-mode images. All data were acquired and analyzed in a blinded fashion.

In vitro chemosensitivity assays: For drug-induced, in vitro chemosensitivity assays, neurons were plated in 48-well plates and treated with indicated concentrations of Doxorubicin or Staurosporine (Sigma-Aldrich) for 24 hr. Caspase 3/7 Glo Assay (Promega, Madison WI) was then performed according to manufacturer's instructions and luminescence was measured on a Safire2 microplate reader (Tecan, Männedorf Switzerland). Luminescence readings were normalized to untreated control cells.

Human protein expression data: Fourier-transform mass spectrometry protein expression data in adult and fetal human tissues generated by Kim, et al. (Kim et al., 2014), was downloaded via the humanproteomemap.org website on November 11<sup>th</sup>, 2014 and again on June 1<sup>st</sup>, 2015 for local analysis. Expression of relevant proteins in adult and fetal tissues was assessed by examining peptide-level data for each protein, with data excluded from any peptides that were not gene-specific (Table S1 and S2). Spectral counts for all gene-specific peptides were summed and heatmaps were generated by normalizing to the summed spectral count of the tissue displaying the highest expression of each protein analyzed.

Gene expression data in human brain: RNA sequencing (RNA-Seq) data generated across 13 developmental stages in 8-16 brain structures by Miller, et al. (Miller et al., 2014) was downloaded via the brainspan.org website on December 17, 2013 for local analysis. mRNA expression of *BAX* was examined across all brain regions and from the earliest available data (8 weeks post conception) to adulthood (23 years of age). All samples were from



pathologically normal donors. Additional details and documentation is available at [brainspan.org](http://brainspan.org).

Statistical analysis: two-way ANOVA (including Fisher's Least Significant Difference [LSD] test for multiple comparisons) was performed using the GraphPad Prism software (GraphPad Software, La Jolla CA). Significance: \*  $p < 0.05$ ; \*\*  $p < 0.01$ ; \*\*\*  $p < 0.001$ ; \*\*\*\*  $p < 0.0001$ .

Rat primary hippocampal neuronal cultures: Neurons were prepared and grown as described previously (Minogue et al., 2009; Walsh et al., 2009). Hippocampi were explanted from E18 Sprague Dawley rat pups in Hank's balanced salt solution and dissociated using 0.25% trypsin (Invitrogen, Carlsbad, CA) for 16 min at 37°C. Neurons were plated at a density of  $3 \times 10^4$  cells on the inner 24 wells of poly-D-lysine coated 48-well plates and cultivated in Neurobasal medium supplemented with 0.5 mM Glutamax-I (Invitrogen, Carlsbad, CA) and B27 with antioxidants (Invitrogen, Carlsbad, CA). Five days after plating, 20  $\mu$ M of 5-fluoro-2'-deoxyuridine was added to reduce glial proliferation. Cultures were kept in a humidified incubator at 37°C and 5% CO<sub>2</sub> and once per week half of the media was replaced with fresh Neurobasal medium containing 0.5 mM Glutamax-I and B27 with antioxidants (Kaech and Banker, 2006). Every 3 days after plating, cells from a single well were collected using 0.25% trypsin, washed once with phosphate-buffered saline, and BH3 Profiled as outlined above.

Production and purification of cBID, BIML, and BAX: cBID was produced as previously described (Zha, 2000) with these modifications: 1) BID was cloned into pet16b; 2) cBID was eluted from the column with imidazole. For BIML, the cDNA encoding full-length wildtype murine BIML was cloned into pBluescript II KS(+) vector (Stratagene, Santa Clara CA). DNA sequences encoding a polyhistidine tag followed by a TEV protease recognition site (MHHHHHHGGSGGTGGSENLVYFQGT) and an intein/chitin-binding domain were added to the plasmid such that the new plasmid encoded a fusion protein with both an N-terminal His tag and Tev site and an intein/chitin-binding domain at the C-terminus of BIML. The recombinant construct was expressed in SoluBL21 Escherichia coli strain (Genlantis, San Diego CA). Lysis of E. coli was achieved by mechanical disruption with a French press. After affinity chromatography with a chitin column, intein self-cleavage and release of BIML from its fusion partner intein-CBD was initiated by incubation with buffer containing 100 mM  $\beta$ -mercaptoethanol for 36 hr. This process leaves no additional amino acid residues on the C-terminus of BIML. The elution fraction from chitin column was then applied to a Nickel-NTA column (Qiagen, Valencia CA) and BIML was eluted from the Ni column with buffer containing 20 mM HEPES (pH 7.4), 100 mM NaCl, 20% glycerol, 0.3% CHAPS, and 300 mM imidazole. The purified BIML protein was dialyzed against 20 mM HEPES (pH 7.4), 100mM NaCl and 20% glycerol, then flash-frozen and stored at -80 °C. Recombinant BAX was produced as previously described (Suzuki et al., 2000).

Immunohistochemistry: Tissues were collected from mice and immediately placed into 8% formaldehyde solution (Electron Microscopy Sciences, Hatfield PA) and incubated on a rotator for 24 hr at 4°C. The formaldehyde was then replaced with cold PBS and incubated for another 24 hr at 4°C and then stored at 4°C until analysis. Tissues were paraffin embedded and cut into 4 $\mu$ M-thick sections. Slides were stained on the Leica Bond III



autostaining platform using the Bond Polymer Refine Detection kit (Leica, Chicago, IL). Antigen retrieval was performed online using Bond Epitope Retrieval 1 (Leica, Chicago, IL) for 30 min. Slides were then incubated at room temperature with primary antibodies against Cleaved Caspase 3 (Cell Signaling Technology #9664), BAX (Cell Signaling Technology #2772) for 60 min, or BAK (Cell Signaling Technology #12105) for 30 min diluted in Bond Primary Antibody Diluent (Leica, Chicago, IL). Primary antibodies were detected with Post Primary, followed by Polymer-HRP reagents from the Polymer Refine Detection Kit. Slides were developed in Diaminobenzene for 10 min.

TUNEL: Formalin-fixed paraffin tissue sections were stained for terminal deoxynucleotidyl transferase-mediated dUTP nick end labeling (TUNEL) with the ApopTag Peroxidase In Situ Apoptosis Detection Kit (R&D Systems, Minneapolis MN) according to the manufacturer's instructions. At least five views in each slide were randomly selected and quantified for positive staining. Two animals in each group were studied. Results were presented as TUNEL-positive cells per 40X field of view.

Heart histology: Harvested hearts were arrested in diastole with 3 M KCl and fixed with 8% buffered formaldehyde solution and incubated on a rotator for 24 hr at 4°C. The formaldehyde was then replaced with cold PBS and incubated for another 24 hr at 4°C and then stored at 4°C until analysis. Hearts were then embedded in paraffin for analysis by histology. Samples were sectioned at the Histology Core Facility at Beth Israel Deaconess Medical Center. Masson's trichrome staining (MTS) was performed according to the manufacturer's protocol (Sigma-Aldrich, St Louis MO).

Flow-cytometry based BH3 Profiling with intracellular c-Myc staining: Tissues were collected and added to 500  $\mu$ L PBS on ice. To remove blood, samples were crudely separated, and vortexed in fresh, cold PBS solution three times. Samples were then removed from solution and mechanically separated until finely dissociated, at which time PBS was added to the sample and pipetted repeatedly for further dissociation. The samples, in solution, were then run through a 45  $\mu$ m filter to ensure single cell suspension. Samples were centrifuged for 5 min at 500xg, resuspended in FACS staining buffer (PBS, 2 mM EGTA, 2% FBS), and stained on ice for 15 min with AF594 anti-mouse CD45 antibody at 1:100 dilution (Biolegend #103144). Samples were then centrifuged for 5 min at 500xg and resuspended in Newmeyer buffer (300 mM Trehalose, 10 mM HEPES-KOH, 80 mM KCl, 1mM EGTA, 1 mM EDTA, 0.1% BSA, 5 mM Succinate, ph 7.7). Flow cytometry-based BH3 Profiling was then performed as previously described (Ryan and Letai, 2013). Samples were added to a 96 well, V-bottom plate (Corning #3897) containing titrated doses of the BIM and/or BID BH3 peptide and positive and negative controls, all in 0.02% digitonin. The plate was then incubated at 28°C for 1 hr. Peptide exposure was terminated by adding 8% formaldehyde in PBS at 1:4 ratio (2% final concentration of formaldehyde). After 15 min, formaldehyde was neutralized with N2 buffer (1.7 M Tris base, 1.25 M Glycine, ph 9.1). 4x Intracellular Staining buffer with TritonX-100 (PBS, 1% Saponin, 10% BSA, 20% FBS, 0.02% Sodium Azide, 2% TritonX-100) was added to each well. The following antibodies were added to all wells except for unstained control wells at the dilutions indicated: Cytochrome c at 1:1000 (ThermoFisher, clone 6H2.B4 with AF647 tag), Hoechst 33342 at 1:2000 (Life technologies #H3570), c-Myc at 1:1000 (Cell Signaling Technology #13987 [rabbit mAb]). Plate was sealed with an adhesive cover and left to stain



overnight at 4°C. Plate was then centrifuged at 500xg for 5 min and the wells were aspirated, leaving behind the cell pellet. Cell pellet was washed once in FACS staining buffer, centrifuged again, and resuspended in 4x Intracellular Staining buffer with TritonX-100 containing anti-rabbit IgG secondary antibody with AF488 tag at 1:1000 (Life technologies #A11070). Plate was sealed with an adhesive cover and left to stain overnight at 4°C. Plate was then centrifuged at 500xg for 5 min and washed with FACS staining buffer twice, then cells were resuspended in FACS staining buffer for analysis on a BD Biosciences LSR II flow cytometer (BD Biosciences).

ChIP-qPCR: Analysis of Myc occupancy on enhancer boxes of promoters of genes of interest was carried out using Active Motif's ChIP-IT qPCR Analysis Kit (Active Motif, Carlsbad, CA) according to manufacturer's instructions using 30 ug of mouse tissue chromatin from each organ (P0 spleen, liver, heart, kidney and brain; adult spleen, kidney and brain) and 25 ul of anti-c-Myc antibody (Santa Cruz Biotechnology sc-764). qPCR was performed using one positive control primer pair (Mybbp1a) and a negative control primer pair that amplifies a region in a gene desert on chromosome 6 (Untr6), as well as the regions spanning E-boxes in genes of interest.

Immune-system mediated liver damage: Age-matched adult mice were injected intravenously with Concanavalin A (Sigma-Aldrich) at 15 mg/kg or vehicle. Injections took place 24, 48, 72, 96, and 120 hr before tissue collection. All mice were culled simultaneously and their livers were collected and processed for flow-cytometry based BH3 Profiling as outlined above.

## Supplemental References

Bauer, M., Cheng, S., Jain, M., Ngoy, S., Theodoropoulos, C., Trujillo, A., Lin, F.C., and Liao, R. (2011). Echocardiographic speckle-tracking based strain imaging for rapid cardiovascular phenotyping in mice. *Circ. Res.* 108, 908–916.

Kaech, S., and Banker, G. (2006). Culturing hippocampal neurons. *Nat. Protoc.* 1, 2406–2415.

Kim, M.-S., Pinto, S.M., Getnet, D., Nirujogi, R.S., Manda, S.S., Chaerkady, R., Madugundu, A.K., Kelkar, D.S., Isserlin, R., Jain, S., et al. (2014). A draft map of the human proteome. *Nature* 509, 575–581.

Lindsten, T., Ross, a J., King, a, Zong, W.X., Rathmell, J.C., Shiels, H. a, Ulrich, E., Waymire, K.G., Mahar, P., Frauwirth, K., et al. (2000). The combined functions of proapoptotic Bcl-2 family members bak and bax are essential for normal development of multiple tissues. *Mol. Cell* 6, 1389–1399.

Miller, J. a, Ding, S.-L., Sunkin, S.M., Smith, K. a, Ng, L., Szafer, A., Ebbert, A., Riley, Z.L., Royall, J.J., Aiona, K., et al. (2014). Transcriptional landscape of the prenatal human brain. *Nature* 508, 199–206.

Minogue, A.M., Stubbs, A.K., Frigerio, C.S., Boland, B., Fadeeva, J. V, Tang, J., Selkoe,



D.J., and Walsh, D.M. (2009). gamma-secretase processing of APLP1 leads to the production of a p3-like peptide that does not aggregate and is not toxic to neurons. *Brain Res.* 1262, 89–99.

Montero, J., Sarosiek, K.A., DeAngelo, J.D., Maertens, O., Ryan, J., Ercan, D., Piao, H., Horowitz, N.S., Berkowitz, R.S., Matulonis, U., et al. (2015). Drug-Induced Death Signaling Strategy Rapidly Predicts Cancer Response to Chemotherapy. *Cell* 160, 977–989.

Ryan, J., and Letai, A. (2013). BH3 profiling in whole cells by fluorimeter or FACS. *Methods*.

Suzuki, M., Youle, R.J., and Tjandra, N. (2000). Structure of Bax: coregulation of dimer formation and intracellular localization. *Cell* 103, 645–654.

Walsh, D.M., Thulin, E., Minogue, A.M., Gustavsson, N., Pang, E., Teplow, D.B., and Linse, S. (2009). A facile method for expression and purification of the Alzheimer's disease-associated amyloid beta-peptide. *FEBS J.* 276, 1266–1281.

Zha, J. (2000). Posttranslational N-Myristoylation of BID as a Molecular Switch for Targeting Mitochondria and Apoptosis. *Science* (80-. ). 290, 1761–1765.
